# Supplementary material
Source: PubMed Central journal article supplement (PMC6852619)
Supplement: NIHMS1040224-supplement-Supplement.pdf [file NIHMS1040224-supplement-Supplement.pdf]

## Supplemental Information

|                                                                                                                             |           |
|-----------------------------------------------------------------------------------------------------------------------------|-----------|
| <b>Section 1: Tractography-Level Quality Control .....</b>                                                                  | <b>2</b>  |
| <i>Table 1.1. Quality Control: Rates of Failure and Tract Properties</i>                                                    | 2         |
| <i>Figure 1.1. Visualizations of neonatal and pediatric (1 and 2-year) atlas tracts.</i>                                    | 3         |
| <b>Section 2: Mediation Analyses .....</b>                                                                                  | <b>4</b>  |
| <i>Figure 2.1. Mediation Model</i>                                                                                          | 4         |
| <i>Table 2.1. FA Mediation Model</i>                                                                                        | 5         |
| <i>Table 2.2. AD Mediation Model</i>                                                                                        | 6         |
| <i>Table 2.3. RD Mediation Model</i>                                                                                        | 7         |
| <b>Section 3: Preterm vs. Full-term Samples.....</b>                                                                        | <b>8</b>  |
| <i>Figure 3.1. Unadjusted Correlations between WM at Birth and Cognition at 1 and 2 in Full-term and Preterm Samples</i>    | 8         |
| <i>Figure 3.2. Adjusted Correlations between WM at Birth and Cognition at 1 in Full-term and Preterm Samples</i>            | 9         |
| <i>Figure 3.3. Unadjusted Correlations between WM at Age 1 and Cognition at 1 in Full-term and Preterm Samples</i>          | 10        |
| <i>Figure 3.4. Adjusted Correlations between WM at Age 1 and Cognition at 1 in Full-term and Preterm Samples</i>            | 11        |
| <i>Table 3.1. Longitudinal Mixed Model Results in the Preterm Sample</i>                                                    | 12        |
| <i>Table 3.2. Longitudinal Mixed Model Results in the Full-term Sample</i>                                                  | 12        |
| <b>Section 4: Twin versus Singleton Samples .....</b>                                                                       | <b>13</b> |
| <i>Figure 4.1. Unadjusted Correlations between WM at Birth and Cognition at 1 and 2 in Twin and Singleton Samples</i>       | 13        |
| <i>Figure 4.2. Unadjusted Correlations between WM at Age 1 and Cognition at 1 and 2 in Twin and Singleton Samples</i>       | 14        |
| <i>Figure 4.3. Unadjusted Correlations between WM at Age 2 and Cognition at 2 in Twin and Singleton Samples</i>             | 15        |
| <b>Section 5: Mixed Effects Models.....</b>                                                                                 | <b>16</b> |
| <i>Figure 5.1. Mixed Model Findings between WM in Neonates, 1-yr-olds, and 2-yr-olds and Cognition at 1</i>                 | 16        |
| <b>Section 6: Correcting Correlations between WM and Cognition for Age and Sex Only.....</b>                                | <b>17</b> |
| <i>Table 6.1.a: Comparison between Age-Sex Corrected and Unadjusted Correlations – AD at birth and MSEL Scores at age 1</i> | 17        |
| <i>Table 6.1.b: Comparison between Age-Sex Corrected and Unadjusted Correlations – RD at birth and MSEL Scores at age 1</i> | 18        |
| <i>Table 6.1.c: Comparison between Age-Sex Corrected and Unadjusted Correlations – FA at birth and MSEL Scores at age 1</i> | 19        |
| <i>Table 6.2.a: Comparison between Age-Sex Corrected and Unadjusted Correlations – AD at birth and MSEL Scores at age 2</i> | 20        |
| <i>Table 6.2.b: Comparison between Age-Sex Corrected and Unadjusted Correlations – RD at birth and MSEL Scores at age 2</i> | 21        |
| <i>Table 6.2.c: Comparison between Age-Sex Corrected and Unadjusted Correlations –FA at birth and MSEL Scores at age 2</i>  | 22        |
| <i>Table 6.3.a: Comparison between Age-Sex Corrected and Unadjusted Correlations –AD at age 1 and MSEL Scores at age 1</i>  | 23        |
| <i>Table 6.3.b: Comparison between Age-Sex Corrected and Unadjusted Correlations –RD at age 1 and MSEL Scores at age 1</i>  | 24        |
| <i>Table 6.3.c: Comparison between Age-Sex Corrected and Unadjusted Correlations –FA at age 1 and MSEL Scores at age 1</i>  | 25        |
| <i>Table 6.4.a: Comparison between Age-Sex Corrected and Unadjusted Correlations –AD at age 1 and MSEL Scores at age 2</i>  | 26        |
| <i>Table 6.4.b: Comparison between Age-Sex Corrected and Unadjusted Correlations –RD at age 1 and MSEL Scores at age 2</i>  | 27        |
| <i>Table 6.4.c: Comparison between Age-Sex Corrected and Unadjusted Correlations –FA at age 1 and MSEL Scores at age 2</i>  | 28        |
| <i>Table 6.5.a: Comparison between Age-Sex Corrected and Unadjusted Correlations –AD at age 2 and MSEL Scores at age 2</i>  | 29        |
| <i>Table 6.5.b: Comparison between Age-Sex Corrected and Unadjusted Correlations –RD at age 2 and MSEL Scores at age 2</i>  | 30        |
| <i>Table 6.5.c: Comparison between Age-Sex Corrected and Unadjusted Correlations –FA at age 2 and MSEL Scores at age 2</i>  | 31        |

**Section 1: Tractography-Level Quality Control**

Tract-based failure rates for the entire subject sample with images in our study are reported below in *Table 1.1*. Terminal arc lengths were not included in the tract average calculations of FA, AD, and RD for tracts with high noise. Visualizations of excluded portions of the tracts can be seen in *Figure 1.1*.

*Table 1.1. Quality Control: Rates of Failure and Tract Properties*

|                   | Neonates (N=662) |               | 1-year (N=435) |               | 2-year (N=325) |               |
|-------------------|------------------|---------------|----------------|---------------|----------------|---------------|
|                   | % Failures       | Cropped (Y/N) | % Failures     | Cropped (Y/N) | % Failures     | Cropped (Y/N) |
| <b>ARC-FP (L)</b> | 8%               |               | 0%             |               | 0%             |               |
| <b>ARC-FP (R)</b> | 20%              |               | 0%             |               | 0%             |               |
| <b>ARC-FT (L)</b> | 3%               |               | 1%             |               | 0%             |               |
| <b>ARC-FT (R)</b> | 2%               |               | 3%             |               | 2%             |               |
| <b>ARC-TP (L)</b> | 38%              |               | 1%             |               | 0%             |               |
| <b>ARC-TP (R)</b> | 1%               | Y             | 1%             |               | 0%             |               |
| <b>CF-M (L)</b>   | 0%               | Y             | 5%             |               | 0%             |               |
| <b>CF-M (R)</b>   | 0%               | Y             | 1%             |               | 0%             |               |
| <b>CGC (L)</b>    | 0%               |               | 0%             |               | 1%             |               |
| <b>CGC (R)</b>    | 0%               | Y             | 0%             | Y             | 0%             | Y             |
| <b>CT-M (L)</b>   | 0%               |               | 0%             | Y             | 0%             | Y             |
| <b>CT-M (R)</b>   | 3%               |               | 0%             |               | 0%             |               |
| <b>CT-Par (L)</b> | 12%              |               | 0%             |               | 0%             |               |
| <b>CT-Par (R)</b> | 0%               |               | 0%             |               | 0%             |               |
| <b>CT-PFC (L)</b> | 0%               |               | 0%             |               | 0%             |               |
| <b>CT-PFC (R)</b> | 0%               | Y             | 0%             |               | 0%             |               |
| <b>CT-PM (L)</b>  | 0%               |               | 0%             |               | 0%             |               |
| <b>CT-PM (R)</b>  | 0%               |               | 0%             |               | 0%             |               |
| <b>IFOF (L)</b>   | 0%               |               | 1%             |               | 0%             |               |
| <b>IFOF (R)</b>   | 0%               |               | 0%             |               | 0%             |               |
| <b>ILF (L)</b>    | 0%               |               | 0%             |               | 0%             |               |
| <b>ILF (R)</b>    | 0%               |               | 0%             |               | 0%             |               |
| <b>SLF (L)</b>    | 0%               | Y             | 1%             |               | 0%             |               |
| <b>SLF (R)</b>    | 1%               |               | 2%             |               | 2%             |               |
| <b>UNC (L)</b>    | 0%               |               | 1%             |               | 1%             |               |
| <b>UNC (R)</b>    | 7%               |               | 1%             |               | 0%             |               |
| <b>Genu</b>       | 16%              |               | 1%             |               | 1%             |               |
| <b>Rostrum</b>    | 1%               |               | 1%             |               | 0%             |               |
| <b>Splenium</b>   | 1%               | Y             | 0%             |               | 0%             |               |

Figure 1.1. Visualizations of neonatal and pediatric (1 and 2-year) atlas tracts.

Black segments denote those which were excluded. A) ARC-TP-L, (B) Genu (indicated by black arrow, very small area of cropping), (C) Rostrum, (D) IFOF, (E) CF-M-L, (F) CT-Par-L, (G) UNC-R, (H) CF-M-L, (I) CF-M-R. The coloring of the tracts (green to yellow to red) is associated with the value of the arc length (location) along the tract; it is arbitrary (in that the value bears no influence on how the data were measured) but does span a positive-to-negative spectrum where the values invert at the center of the tract.

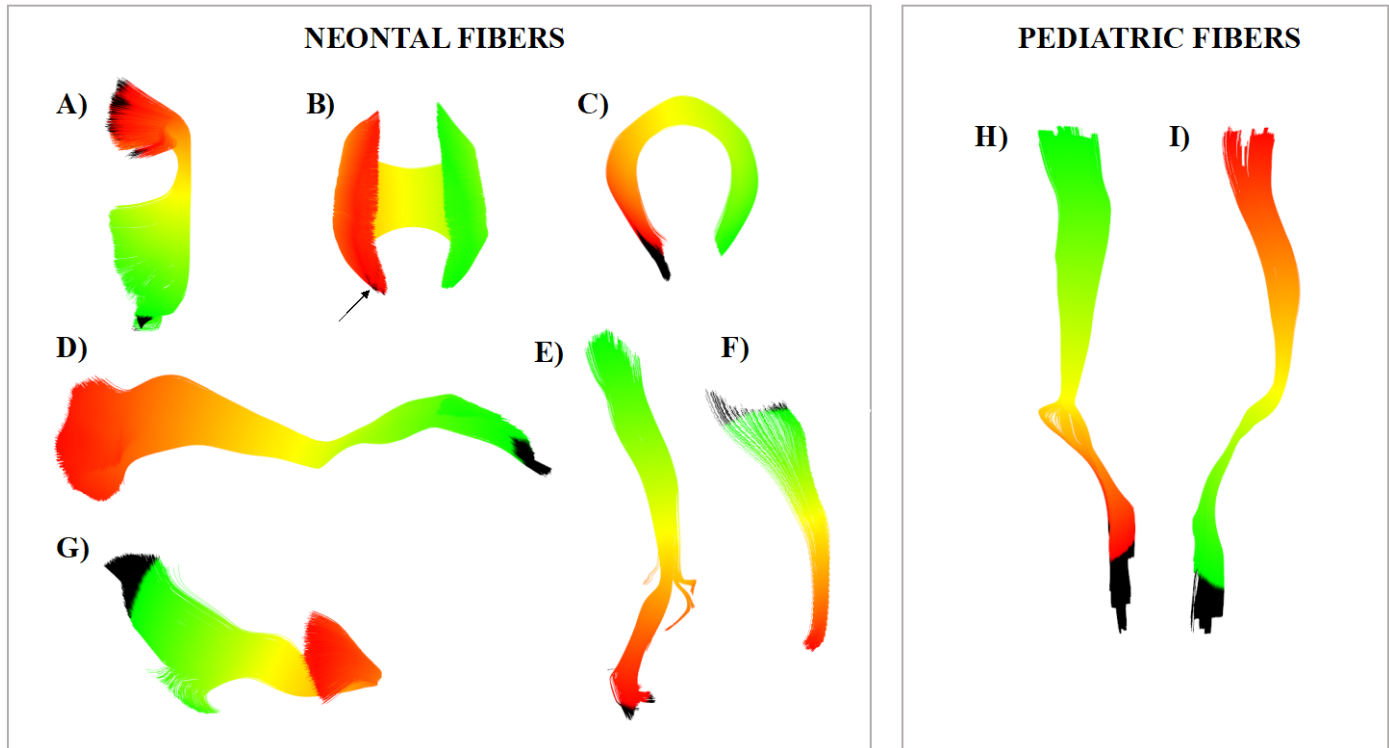

**Section 2: Mediation Analyses**

Mediation analyses were conducted as shown below in *Figure 2.1*. The model estimates  $a$ ,  $b$ , and  $c'$  and their standard errors (SE) are reported along with Sobel test statistics in Tables 2.1 – 2.3 for FA, AD, and RD respectively.

*Figure 2.1. Mediation Model*

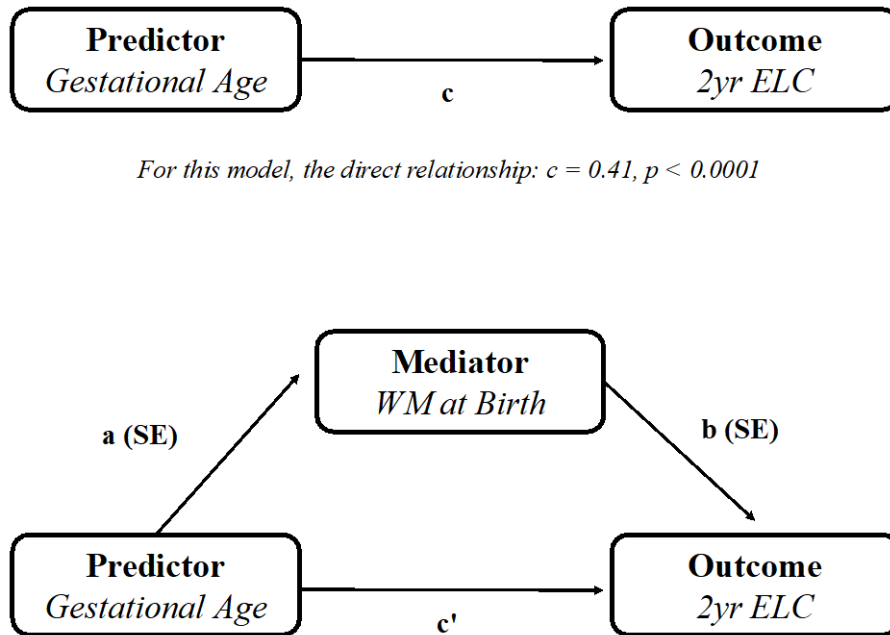

Table 2.1. FA Mediation Model

| Tract           | Full Model |              |                 | GA and FA0 |             |                 | FA0 and ELC2 (with GA) |             |                 | Sobel Test   |           |             |
|-----------------|------------|--------------|-----------------|------------|-------------|-----------------|------------------------|-------------|-----------------|--------------|-----------|-------------|
|                 | <i>c'</i>  | <i>c' SE</i> | <i>fdr pval</i> | <i>a</i>   | <i>a SE</i> | <i>fdr pval</i> | <i>b</i>               | <i>b SE</i> | <i>fdr pval</i> | <i>Tstat</i> | <i>SE</i> | <i>pval</i> |
| <i>ARC_FP_L</i> | 0.43       | 0.08         | 3.1E-07         | 6.1E-04    | 8.9E-05     | 2.8E-10         | 36.22                  | 49.63       | 0.77            | 0.73         | 0.03      | 0.47        |
| <i>ARC_FP_R</i> | 0.42       | 0.08         | 5.4E-07         | 4.3E-04    | 1.0E-04     | 3.7E-05         | 37.65                  | 48.30       | 0.77            | 0.77         | 0.02      | 0.44        |
| <i>ARC_FT_L</i> | 0.43       | 0.08         | 1.1E-07         | 4.1E-04    | 7.6E-05     | 1.5E-07         | -36.14                 | 54.48       | 0.77            | -0.66        | 0.02      | 0.51        |
| <i>ARC_FT_R</i> | 0.42       | 0.08         | 2.4E-07         | 4.9E-04    | 8.3E-05     | 1.7E-08         | 27.04                  | 50.78       | 0.85            | 0.53         | 0.03      | 0.60        |
| <i>ARC_TP_L</i> | 0.48       | 0.09         | 3.1E-07         | 3.5E-04    | 6.9E-05     | 9.8E-07         | -62.61                 | 85.47       | 0.77            | -0.73        | 0.03      | 0.47        |
| <i>ARC_TP_R</i> | 0.40       | 0.07         | 2.6E-07         | 3.3E-04    | 5.8E-05     | 7.7E-08         | 69.69                  | 69.93       | 0.77            | 0.98         | 0.02      | 0.33        |
| <i>CF_M_L</i>   | 0.43       | 0.07         | 1.0E-07         | 4.1E-04    | 8.8E-05     | 4.8E-06         | 5.42                   | 45.99       | 0.97            | 0.12         | 0.02      | 0.91        |
| <i>CF_M_R</i>   | 0.41       | 0.07         | 1.6E-07         | 4.4E-04    | 8.8E-05     | 1.1E-06         | 41.61                  | 44.86       | 0.77            | 0.91         | 0.02      | 0.36        |
| <i>Cing_L</i>   | 0.43       | 0.07         | 5.0E-08         | 1.1E-04    | 8.7E-05     | 1.9E-01         | -3.11                  | 48.26       | 0.97            | -0.06        | 0.01      | 0.95        |
| <i>Cing_R</i>   | 0.46       | 0.07         | 4.0E-08         | 1.9E-04    | 9.3E-05     | 3.9E-02         | -86.71                 | 45.02       | 0.77            | -1.42        | 0.01      | 0.16        |
| <i>CT_M_L</i>   | 0.43       | 0.07         | 1.0E-07         | 4.2E-04    | 7.9E-05     | 3.7E-07         | -4.67                  | 52.19       | 0.97            | -0.09        | 0.02      | 0.93        |
| <i>CT_M_R</i>   | 0.40       | 0.08         | 3.1E-07         | 4.8E-04    | 8.0E-05     | 1.2E-08         | 52.47                  | 51.35       | 0.77            | 1.01         | 0.03      | 0.31        |
| <i>CT_Par_L</i> | 0.42       | 0.07         | 1.1E-07         | 4.5E-04    | 9.2E-05     | 1.7E-06         | 18.80                  | 43.59       | 0.85            | 0.43         | 0.02      | 0.67        |
| <i>CT_Par_R</i> | 0.41       | 0.07         | 1.5E-07         | 5.1E-04    | 9.3E-05     | 1.5E-07         | 29.40                  | 42.78       | 0.77            | 0.68         | 0.02      | 0.50        |
| <i>CT_PFC_L</i> | 0.44       | 0.08         | 1.1E-07         | 5.3E-04    | 8.3E-05     | 1.5E-09         | -21.74                 | 52.70       | 0.85            | -0.41        | 0.03      | 0.68        |
| <i>CT_PFC_R</i> | 0.42       | 0.08         | 2.7E-07         | 5.4E-04    | 7.9E-05     | 2.2E-10         | 20.10                  | 52.86       | 0.85            | 0.38         | 0.03      | 0.70        |
| <i>CT_PM_L</i>  | 0.42       | 0.07         | 1.4E-07         | 4.0E-04    | 8.3E-05     | 3.3E-06         | 23.61                  | 50.17       | 0.85            | 0.47         | 0.02      | 0.64        |
| <i>CT_PM_R</i>  | 0.41       | 0.08         | 2.4E-07         | 5.0E-04    | 8.8E-05     | 6.5E-08         | 32.71                  | 46.84       | 0.77            | 0.69         | 0.02      | 0.49        |
| <i>IFOF_L</i>   | 0.39       | 0.08         | 1.5E-06         | 7.0E-04    | 9.5E-05     | 1.3E-11         | 54.33                  | 44.81       | 0.77            | 1.20         | 0.03      | 0.23        |
| <i>IFOF_R</i>   | 0.39       | 0.08         | 1.3E-06         | 6.9E-04    | 9.2E-05     | 5.5E-12         | 35.87                  | 46.53       | 0.77            | 0.77         | 0.03      | 0.44        |
| <i>ILF_L</i>    | 0.39       | 0.08         | 6.2E-07         | 5.9E-04    | 1.0E-04     | 1.9E-08         | 57.85                  | 42.50       | 0.77            | 1.33         | 0.03      | 0.18        |
| <i>ILF_R</i>    | 0.40       | 0.07         | 3.1E-07         | 5.5E-04    | 9.0E-05     | 1.2E-08         | 64.24                  | 45.72       | 0.77            | 1.37         | 0.03      | 0.17        |
| <i>SLF_L</i>    | 0.44       | 0.07         | 8.3E-08         | 3.8E-04    | 8.1E-05     | 5.8E-06         | -8.25                  | 50.90       | 0.97            | -0.16        | 0.02      | 0.87        |
| <i>SLF_R</i>    | 0.40       | 0.08         | 4.5E-07         | 2.6E-04    | 8.5E-05     | 2.4E-03         | 72.96                  | 53.10       | 0.77            | 1.26         | 0.02      | 0.21        |
| <i>UNC_L</i>    | 0.38       | 0.08         | 4.6E-06         | 6.9E-04    | 8.7E-05     | 7.9E-13         | 57.68                  | 49.52       | 0.77            | 1.15         | 0.03      | 0.25        |
| <i>UNC_R</i>    | 0.39       | 0.08         | 1.5E-06         | 7.4E-04    | 8.8E-05     | 4.1E-14         | 35.28                  | 47.71       | 0.77            | 0.74         | 0.04      | 0.46        |
| <i>Genu</i>     | 0.43       | 0.08         | 1.5E-07         | 8.3E-04    | 1.2E-04     | 2.6E-10         | -1.20                  | 34.21       | 0.97            | -0.04        | 0.03      | 0.97        |
| <i>Rost</i>     | 0.45       | 0.08         | 8.3E-08         | 8.6E-04    | 1.3E-04     | 1.1E-09         | -23.21                 | 31.15       | 0.77            | -0.74        | 0.03      | 0.46        |
| <i>Splen</i>    | 0.39       | 0.07         | 2.2E-07         | 3.3E-04    | 1.0E-04     | 1.8E-03         | 89.37                  | 37.99       | 0.56            | 1.89         | 0.02      | 0.06        |

Table 2.2. AD Mediation Model

| Tract           | Full Model |              |                 | GA and AD0 |             |                 | AD0 and ELC2 (with GA) |             |                 | Sobel Test   |           |             |
|-----------------|------------|--------------|-----------------|------------|-------------|-----------------|------------------------|-------------|-----------------|--------------|-----------|-------------|
|                 | <i>c'</i>  | <i>c' SE</i> | <i>fdr pval</i> | <i>a</i>   | <i>a SE</i> | <i>fdr pval</i> | <i>b</i>               | <i>b SE</i> | <i>fdr pval</i> | <i>Tstat</i> | <i>SE</i> | <i>pval</i> |
| <i>ARC_FP_L</i> | 0.43       | 0.08         | 3.1E-07         | -2.2E-06   | 3.2E-07     | 1.7E-10         | -1.9E+04               | 1.3E+04     | 0.75            | 1.40         | 0.03      | 0.16        |
| <i>ARC_FP_R</i> | 0.42       | 0.08         | 5.4E-07         | -1.7E-06   | 3.4E-07     | 7.5E-07         | -1.6E+04               | 1.4E+04     | 0.75            | 1.12         | 0.02      | 0.26        |
| <i>ARC_FT_L</i> | 0.43       | 0.08         | 1.1E-07         | -2.2E-06   | 3.3E-07     | 5.5E-10         | -2.4E+04               | 1.2E+04     | 0.75            | 1.88         | 0.03      | 0.06        |
| <i>ARC_FT_R</i> | 0.42       | 0.08         | 2.4E-07         | -1.9E-06   | 3.0E-07     | 5.5E-10         | -1.9E+04               | 1.4E+04     | 0.75            | 1.36         | 0.03      | 0.17        |
| <i>ARC_TP_L</i> | 0.48       | 0.09         | 3.1E-07         | -2.3E-06   | 3.8E-07     | 1.1E-08         | 4.0E+03                | 1.5E+04     | 0.92            | -0.26        | 0.03      | 0.79        |
| <i>ARC_TP_R</i> | 0.40       | 0.07         | 2.6E-07         | -2.2E-06   | 3.1E-07     | 1.1E-11         | -2.0E+04               | 1.3E+04     | 0.75            | 1.55         | 0.03      | 0.12        |
| <i>CF_M_L</i>   | 0.43       | 0.07         | 1.0E-07         | -1.2E-06   | 2.0E-07     | 3.3E-08         | -1.2E+04               | 2.1E+04     | 0.92            | 0.56         | 0.02      | 0.58        |
| <i>CF_M_R</i>   | 0.41       | 0.07         | 1.6E-07         | -1.1E-06   | 2.0E-07     | 3.5E-08         | -1.0E+04               | 2.0E+04     | 0.92            | 0.49         | 0.02      | 0.63        |
| <i>Cing_L</i>   | 0.43       | 0.07         | 5.0E-08         | -2.4E-06   | 3.5E-07     | 7.0E-11         | -2.0E+03               | 1.2E+04     | 0.92            | 0.17         | 0.03      | 0.87        |
| <i>Cing_R</i>   | 0.46       | 0.07         | 4.0E-08         | -2.3E-06   | 3.8E-07     | 9.1E-09         | -1.6E+04               | 1.1E+04     | 0.75            | 1.41         | 0.03      | 0.16        |
| <i>CT_M_L</i>   | 0.43       | 0.07         | 1.0E-07         | -1.5E-06   | 2.2E-07     | 1.4E-10         | -2.7E+04               | 1.9E+04     | 0.75            | 1.38         | 0.03      | 0.17        |
| <i>CT_M_R</i>   | 0.40       | 0.08         | 3.1E-07         | -1.5E-06   | 2.2E-07     | 9.4E-11         | -9.2E+03               | 1.9E+04     | 0.92            | 0.48         | 0.03      | 0.63        |
| <i>CT_Par_L</i> | 0.42       | 0.07         | 1.1E-07         | -1.3E-06   | 2.3E-07     | 2.1E-08         | -1.8E+04               | 1.8E+04     | 0.79            | 0.97         | 0.02      | 0.33        |
| <i>CT_Par_R</i> | 0.41       | 0.07         | 1.5E-07         | -1.5E-06   | 2.3E-07     | 7.1E-10         | -1.4E+04               | 1.8E+04     | 0.88            | 0.79         | 0.03      | 0.43        |
| <i>CT_PFC_L</i> | 0.44       | 0.08         | 1.1E-07         | -2.1E-06   | 2.8E-07     | 4.8E-13         | -4.1E+03               | 1.5E+04     | 0.92            | 0.28         | 0.03      | 0.78        |
| <i>CT_PFC_R</i> | 0.42       | 0.08         | 2.7E-07         | -2.2E-06   | 2.9E-07     | 1.2E-12         | -2.0E+03               | 1.4E+04     | 0.92            | 0.14         | 0.03      | 0.88        |
| <i>CT_PM_L</i>  | 0.42       | 0.07         | 1.4E-07         | -1.8E-06   | 2.3E-07     | 2.5E-12         | -2.2E+04               | 1.8E+04     | 0.75            | 1.25         | 0.03      | 0.21        |
| <i>CT_PM_R</i>  | 0.41       | 0.08         | 2.4E-07         | -1.8E-06   | 2.3E-07     | 4.8E-13         | -7.8E+03               | 1.8E+04     | 0.92            | 0.45         | 0.03      | 0.66        |
| <i>IFOF_L</i>   | 0.39       | 0.08         | 1.5E-06         | -2.2E-06   | 3.2E-07     | 1.7E-10         | 3.1E+03                | 1.2E+04     | 0.92            | -0.26        | 0.03      | 0.80        |
| <i>IFOF_R</i>   | 0.39       | 0.08         | 1.3E-06         | -2.3E-06   | 3.2E-07     | 1.0E-11         | -4.2E+03               | 1.2E+04     | 0.92            | 0.34         | 0.03      | 0.73        |
| <i>ILF_L</i>    | 0.39       | 0.08         | 6.2E-07         | -2.0E-06   | 3.5E-07     | 6.6E-08         | -4.2E+03               | 1.1E+04     | 0.92            | 0.37         | 0.02      | 0.71        |
| <i>ILF_R</i>    | 0.40       | 0.07         | 3.1E-07         | -2.0E-06   | 3.2E-07     | 3.1E-09         | -1.7E+04               | 1.2E+04     | 0.75            | 1.31         | 0.03      | 0.19        |
| <i>SLF_L</i>    | 0.44       | 0.07         | 8.3E-08         | -1.8E-06   | 2.9E-07     | 6.2E-09         | -1.6E+04               | 1.4E+04     | 0.75            | 1.12         | 0.03      | 0.26        |
| <i>SLF_R</i>    | 0.40       | 0.08         | 4.5E-07         | -1.8E-06   | 2.8E-07     | 5.5E-10         | -1.7E+04               | 1.7E+04     | 0.79            | 0.98         | 0.03      | 0.33        |
| <i>UNC_L</i>    | 0.38       | 0.08         | 4.6E-06         | -3.0E-06   | 3.0E-07     | 6.5E-19         | -2.3E+03               | 1.4E+04     | 0.92            | 0.16         | 0.04      | 0.87        |
| <i>UNC_R</i>    | 0.39       | 0.08         | 1.5E-06         | -2.9E-06   | 3.0E-07     | 4.7E-19         | -1.1E+04               | 1.3E+04     | 0.88            | 0.81         | 0.04      | 0.42        |
| <i>Genu</i>     | 0.43       | 0.08         | 1.5E-07         | -2.6E-06   | 3.1E-07     | 1.5E-14         | -9.4E+03               | 1.3E+04     | 0.89            | 0.74         | 0.03      | 0.46        |
| <i>Rost</i>     | 0.45       | 0.08         | 8.3E-08         | -3.1E-06   | 3.2E-07     | 4.4E-18         | -7.1E+03               | 1.2E+04     | 0.92            | 0.58         | 0.04      | 0.56        |
| <i>Splen</i>    | 0.39       | 0.07         | 2.2E-07         | -1.7E-06   | 3.0E-07     | 5.2E-08         | 7.3E+02                | 1.3E+04     | 0.95            | -0.06        | 0.02      | 0.95        |

Table 2.3. RD Mediation Model

| Tract           | Full Model |              |                 | GA and RD0 |             |                 | RD0 and ELC2 (with GA) |             |                 | Sobel Test   |           |             |
|-----------------|------------|--------------|-----------------|------------|-------------|-----------------|------------------------|-------------|-----------------|--------------|-----------|-------------|
|                 | <i>c'</i>  | <i>c' SE</i> | <i>fdr pval</i> | <i>a</i>   | <i>a SE</i> | <i>fdr pval</i> | <i>b</i>               | <i>b SE</i> | <i>fdr pval</i> | <i>Tstat</i> | <i>SE</i> | <i>pval</i> |
| <i>ARC_FP_L</i> | 0.43       | 0.08         | 3.1E-07         | -2.8E-06   | 3.8E-07     | 1.6E-12         | -1.4E+04               | 1.1E+04     | 0.70            | 1.26         | 0.03      | 0.21        |
| <i>ARC_FP_R</i> | 0.42       | 0.08         | 5.4E-07         | -2.2E-06   | 4.0E-07     | 1.0E-07         | -1.4E+04               | 1.2E+04     | 0.70            | 1.10         | 0.03      | 0.27        |
| <i>ARC_FT_L</i> | 0.43       | 0.08         | 1.1E-07         | -2.5E-06   | 3.4E-07     | 7.2E-12         | -1.3E+04               | 1.2E+04     | 0.70            | 1.07         | 0.03      | 0.29        |
| <i>ARC_FT_R</i> | 0.42       | 0.08         | 2.4E-07         | -2.4E-06   | 3.4E-07     | 7.6E-12         | -1.2E+04               | 1.2E+04     | 0.70            | 0.98         | 0.03      | 0.33        |
| <i>ARC_TP_L</i> | 0.48       | 0.09         | 3.1E-07         | -2.5E-06   | 3.7E-07     | 1.2E-10         | 8.6E+03                | 1.6E+04     | 0.74            | -0.54        | 0.04      | 0.59        |
| <i>ARC_TP_R</i> | 0.40       | 0.07         | 2.6E-07         | -2.5E-06   | 3.2E-07     | 2.5E-13         | -1.7E+04               | 1.2E+04     | 0.70            | 1.35         | 0.03      | 0.18        |
| <i>CF_M_L</i>   | 0.43       | 0.07         | 1.0E-07         | -1.5E-06   | 2.2E-07     | 3.3E-11         | -9.8E+03               | 1.9E+04     | 0.74            | 0.52         | 0.03      | 0.60        |
| <i>CF_M_R</i>   | 0.41       | 0.07         | 1.6E-07         | -1.6E-06   | 2.2E-07     | 7.1E-12         | -1.9E+04               | 1.9E+04     | 0.70            | 0.99         | 0.03      | 0.32        |
| <i>Cing_L</i>   | 0.43       | 0.07         | 5.0E-08         | -1.9E-06   | 2.9E-07     | 3.3E-10         | -2.7E+03               | 1.4E+04     | 0.95            | 0.19         | 0.03      | 0.85        |
| <i>Cing_R</i>   | 0.46       | 0.07         | 4.0E-08         | -2.0E-06   | 2.9E-07     | 1.5E-10         | -1.6E+03               | 1.5E+04     | 0.98            | 0.11         | 0.03      | 0.92        |
| <i>CT_M_L</i>   | 0.43       | 0.07         | 1.0E-07         | -1.8E-06   | 2.4E-07     | 1.3E-12         | -1.4E+04               | 1.8E+04     | 0.70            | 0.81         | 0.03      | 0.42        |
| <i>CT_M_R</i>   | 0.40       | 0.08         | 3.1E-07         | -2.0E-06   | 2.5E-07     | 1.2E-13         | -1.7E+04               | 1.7E+04     | 0.70            | 1.01         | 0.03      | 0.31        |
| <i>CT_Par_L</i> | 0.42       | 0.07         | 1.1E-07         | -1.7E-06   | 2.6E-07     | 1.5E-10         | -1.3E+04               | 1.6E+04     | 0.70            | 0.83         | 0.03      | 0.41        |
| <i>CT_Par_R</i> | 0.41       | 0.07         | 1.5E-07         | -2.0E-06   | 2.7E-07     | 2.7E-12         | -1.6E+04               | 1.5E+04     | 0.70            | 1.07         | 0.03      | 0.29        |
| <i>CT_PFC_L</i> | 0.44       | 0.08         | 1.1E-07         | -2.8E-06   | 3.3E-07     | 1.1E-14         | 6.4E+02                | 1.2E+04     | 0.99            | -0.05        | 0.03      | 0.96        |
| <i>CT_PFC_R</i> | 0.42       | 0.08         | 2.7E-07         | -2.8E-06   | 3.4E-07     | 1.3E-14         | -3.8E+03               | 1.2E+04     | 0.88            | 0.31         | 0.03      | 0.76        |
| <i>CT_PM_L</i>  | 0.42       | 0.07         | 1.4E-07         | -2.1E-06   | 2.7E-07     | 2.5E-13         | -1.8E+04               | 1.6E+04     | 0.70            | 1.13         | 0.03      | 0.26        |
| <i>CT_PM_R</i>  | 0.41       | 0.08         | 2.4E-07         | -2.3E-06   | 2.7E-07     | 1.1E-14         | -1.2E+04               | 1.5E+04     | 0.70            | 0.80         | 0.03      | 0.42        |
| <i>IFOF_L</i>   | 0.39       | 0.08         | 1.5E-06         | -3.0E-06   | 3.5E-07     | 2.1E-15         | -6.1E+03               | 1.2E+04     | 0.74            | 0.51         | 0.04      | 0.61        |
| <i>IFOF_R</i>   | 0.39       | 0.08         | 1.3E-06         | -3.0E-06   | 3.4E-07     | 1.2E-15         | -7.0E+03               | 1.2E+04     | 0.74            | 0.59         | 0.04      | 0.56        |
| <i>ILF_L</i>    | 0.39       | 0.08         | 6.2E-07         | -2.7E-06   | 3.5E-07     | 3.2E-13         | -1.1E+04               | 1.2E+04     | 0.70            | 0.95         | 0.03      | 0.34        |
| <i>ILF_R</i>    | 0.40       | 0.07         | 3.1E-07         | -2.6E-06   | 3.2E-07     | 1.5E-14         | -2.3E+04               | 1.3E+04     | 0.70            | 1.75         | 0.03      | 0.08        |
| <i>SLF_L</i>    | 0.44       | 0.07         | 8.3E-08         | -2.1E-06   | 3.1E-07     | 6.8E-11         | -8.2E+03               | 1.3E+04     | 0.74            | 0.60         | 0.03      | 0.55        |
| <i>SLF_R</i>    | 0.40       | 0.08         | 4.5E-07         | -2.0E-06   | 3.1E-07     | 1.4E-09         | -2.1E+04               | 1.5E+04     | 0.70            | 1.38         | 0.03      | 0.17        |
| <i>UNC_L</i>    | 0.38       | 0.08         | 4.6E-06         | -3.6E-06   | 3.5E-07     | 3.5E-20         | -9.4E+03               | 1.2E+04     | 0.70            | 0.78         | 0.04      | 0.43        |
| <i>UNC_R</i>    | 0.39       | 0.08         | 1.5E-06         | -3.6E-06   | 3.4E-07     | 2.1E-21         | -1.0E+04               | 1.2E+04     | 0.70            | 0.87         | 0.04      | 0.38        |
| <i>Genu</i>     | 0.43       | 0.08         | 1.5E-07         | -3.7E-06   | 4.3E-07     | 1.3E-15         | -4.9E+03               | 9.5E+03     | 0.74            | 0.52         | 0.04      | 0.61        |
| <i>Rost</i>     | 0.45       | 0.08         | 8.3E-08         | -3.9E-06   | 4.2E-07     | 1.5E-17         | 1.6E+02                | 9.7E+03     | 0.99            | -0.02        | 0.04      | 0.99        |
| <i>Splen</i>    | 0.39       | 0.07         | 2.2E-07         | -1.8E-06   | 3.2E-07     | 1.3E-08         | -2.0E+04               | 1.3E+04     | 0.70            | 1.48         | 0.02      | 0.14        |

### Section 3: Preterm vs. Full-term Samples

The sample was split by full-term ( $\geq 37$  weeks gestation) and preterm ( $< 37$  weeks gestation) and results are compared.

Figure 3.1. Unadjusted Correlations between WM at Birth and Cognition at 1 and 2 in Full-term and Preterm Samples  
 Unadjusted (raw) correlations between WM at birth and MSEL scores at ages 1 and 2 are shown for full-term (FT) and preterm (PT) samples. Correlations are presented in order to compare the direction and magnitude of effect sizes can be visualized; very few results survive FDR correction.

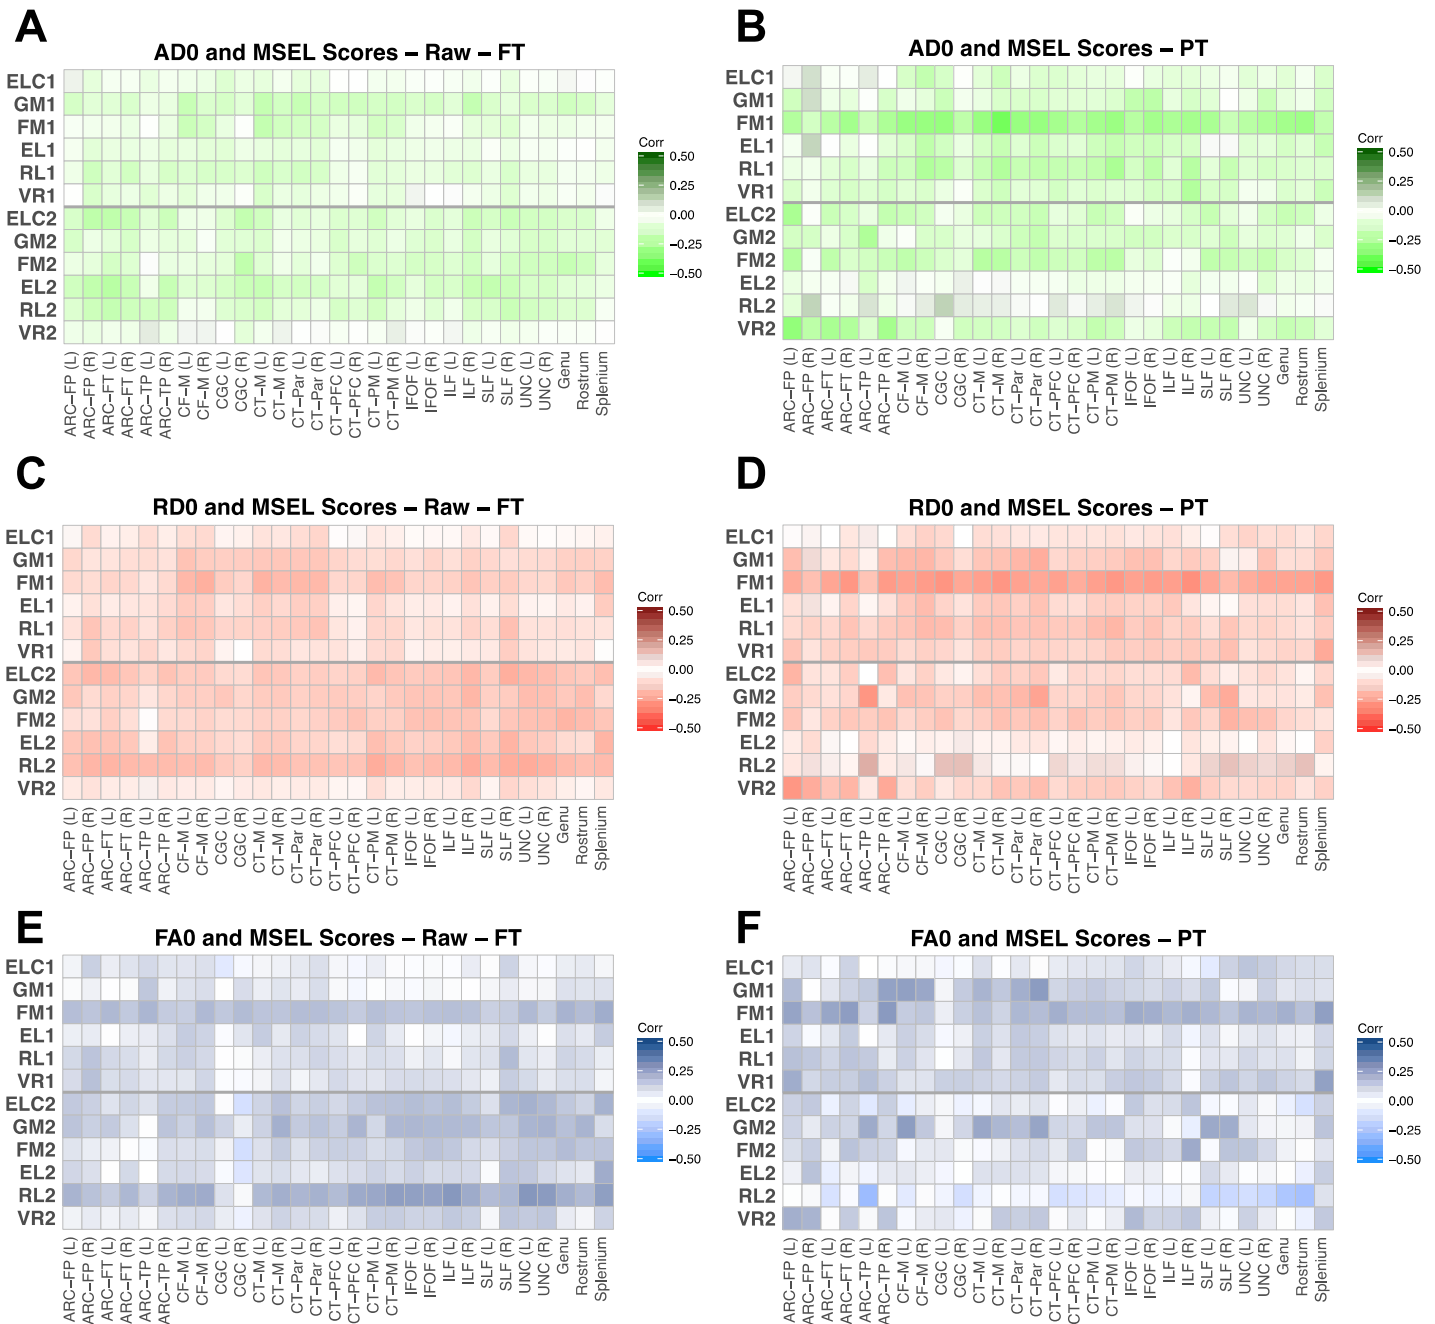



**Figure 3.2. Adjusted Correlations between WM at Birth and Cognition at 1 in Full-term and Preterm Samples**  
 Adjusted correlations (corrected for gestational age at birth, sex, gestation number, maternal education, age at testing, MSEL test date, and scanner variables) between WM at birth and MSEL scores at ages 1 are shown for full-term (FT) and preterm (PT) samples. Correlations are presented in order to compare the direction and magnitude of effect sizes can be visualized; very few results survive FDR correction.

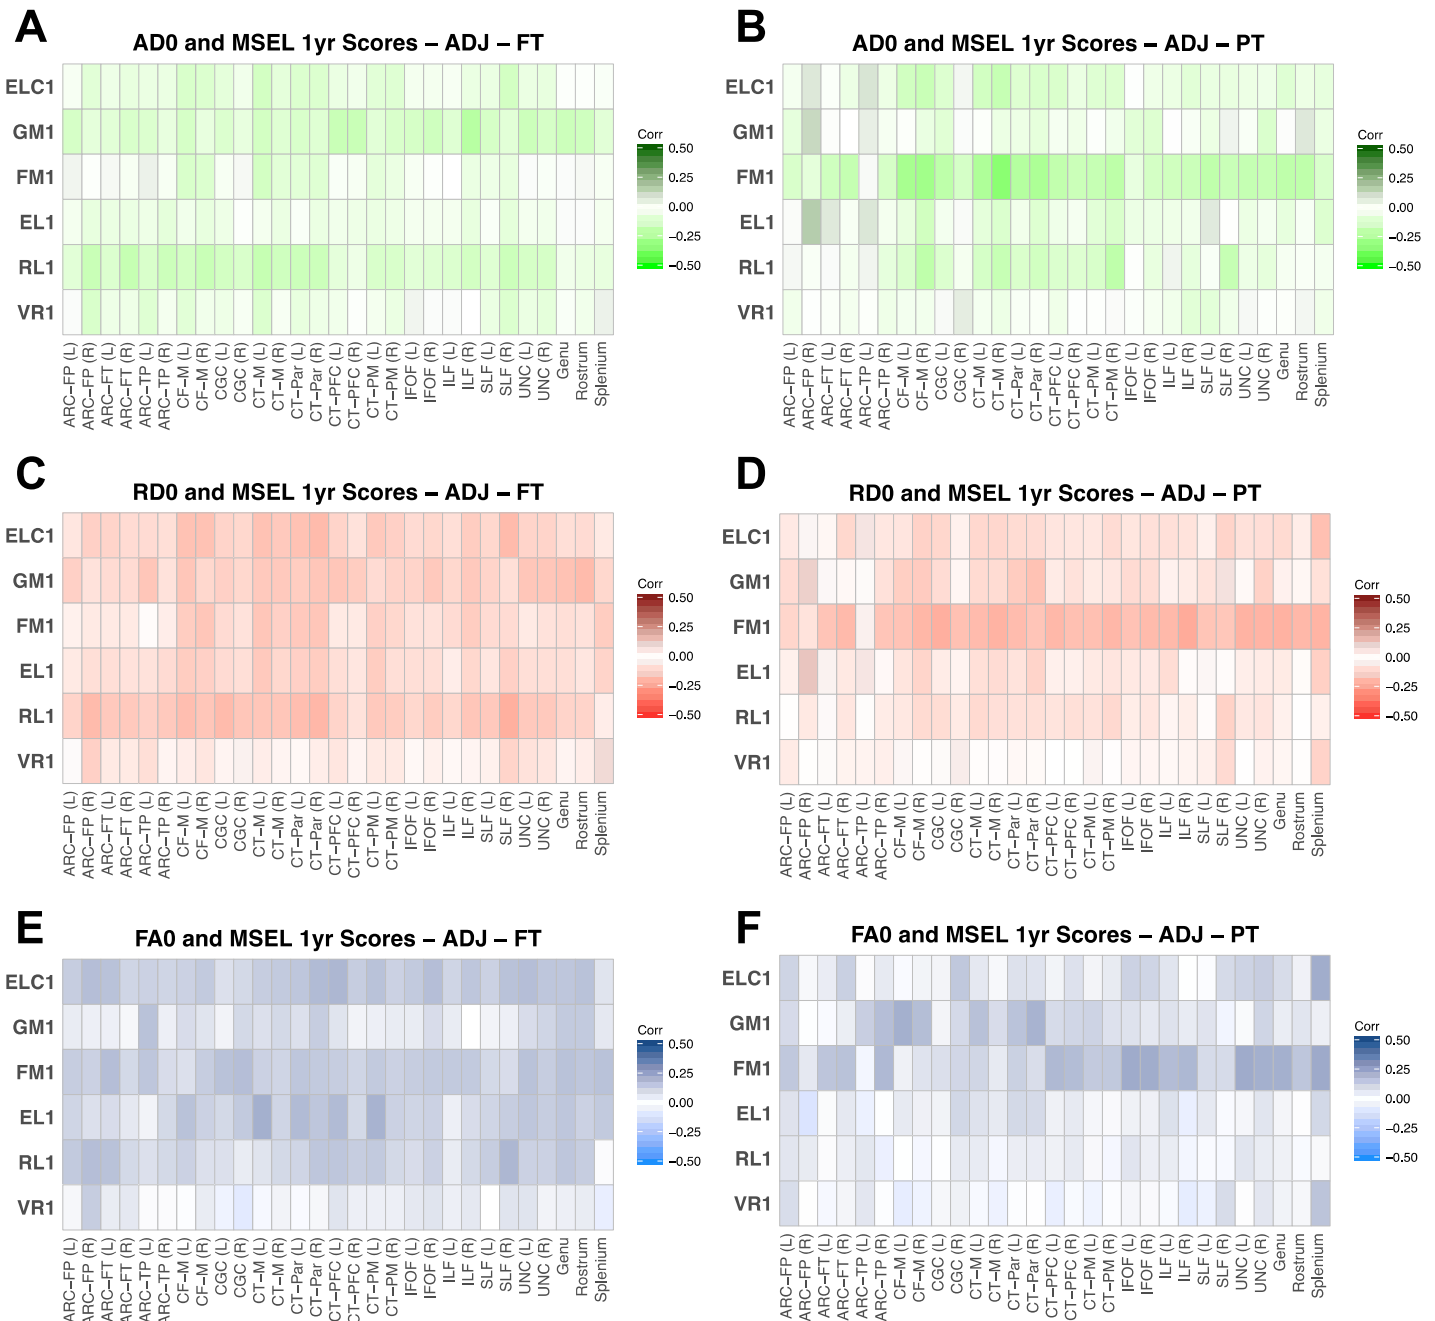

**Figure 3.3. Unadjusted Correlations between WM at Age 1 and Cognition at 1 in Full-term and Preterm Samples**  
 Unadjusted (raw) correlations between WM at age 1 and MSEL scores at age 1 are shown for full-term (FT) and preterm (PT) samples. Correlations are presented in order to compare the direction and magnitude of effect sizes can be visualized; very few results survive FDR correction.

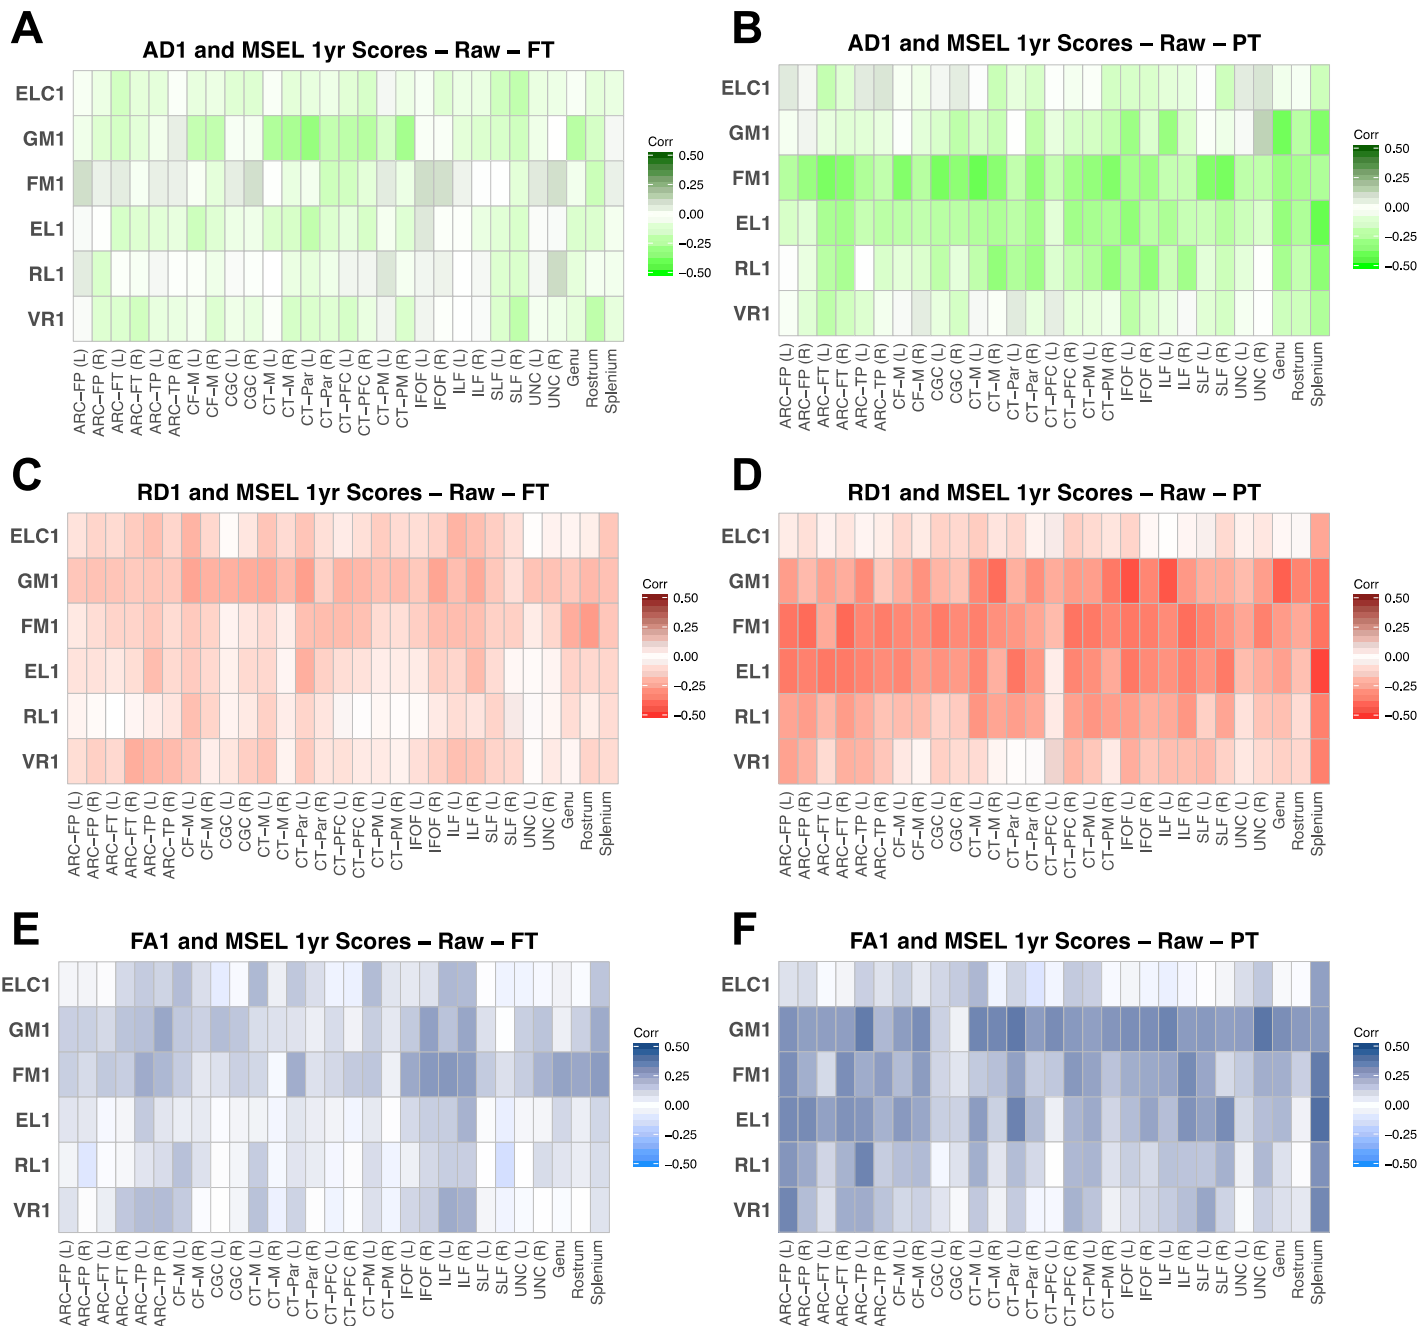

**Figure 3.4. Adjusted Correlations between WM at Age 1 and Cognition at 1 in Full-term and Preterm Samples**  
 Adjusted correlations (corrected for gestational age at birth, sex, gestation number, maternal education, age at testing, MSEL test date, and scanner variables) between WM at age 1 and MSEL scores at ages 1 are shown for full-term (FT) and preterm (PT) samples. Correlations are presented in order to compare the direction and magnitude of effect sizes can be visualized; very few results survive FDR correction.

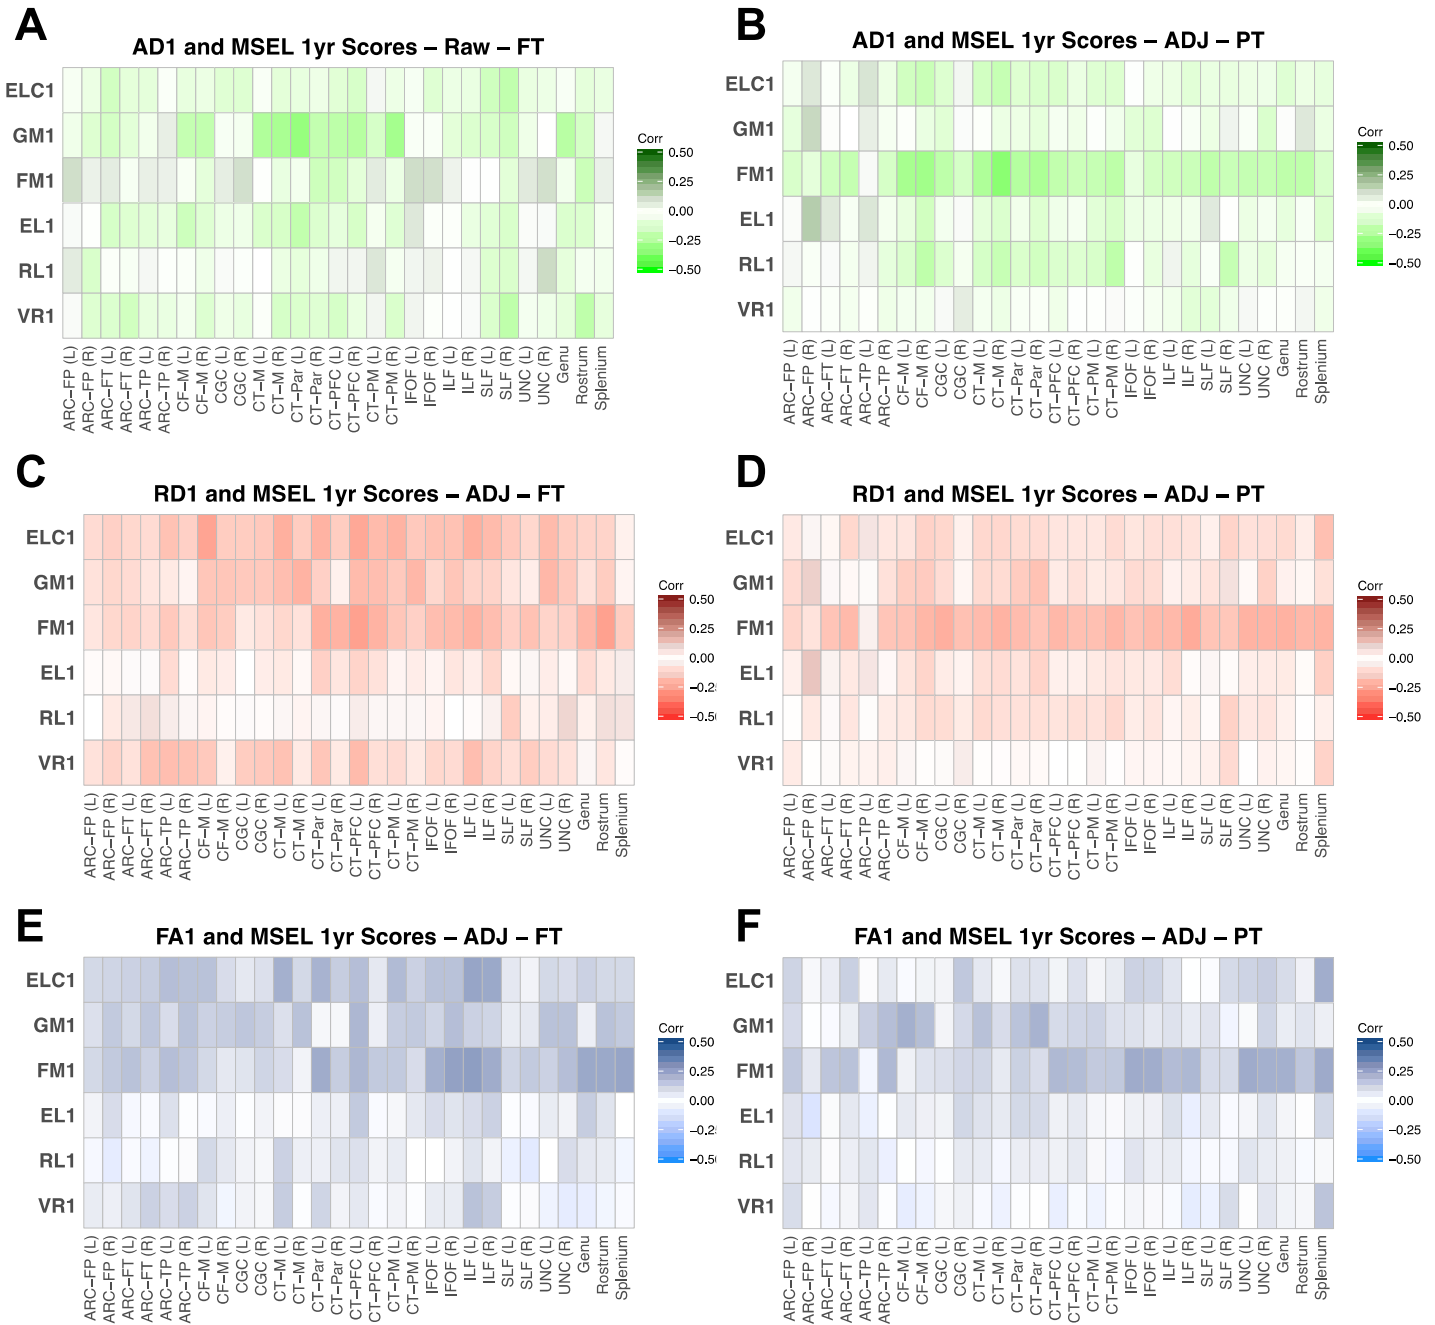

Table 3.1. Longitudinal Mixed Model Results in the Preterm Sample

Mixed models predicting MSEL scores at age 2 from longitudinal tract-based WM were conducted. Findings which were significant for the full sample are shown below for the preterm-only sample for comparison. Models were corrected for gestational age at birth, sex, gestation number, maternal education, age at testing, MSEL test date, and scanner variables. No results survived FDR correction.

| Tract      | MSEL Score | Effect             | Estimate <sup>a</sup> | Trend <sup>b</sup>            | Preterm                 |                 |                       |                     |                    |
|------------|------------|--------------------|-----------------------|-------------------------------|-------------------------|-----------------|-----------------------|---------------------|--------------------|
|            |            |                    |                       |                               | Std. Error <sup>c</sup> | DF <sup>d</sup> | FDR Pval <sup>f</sup> | N Subs <sup>g</sup> | N Obs <sup>h</sup> |
| SLF (R)    | ELC2       | dAD <sub>2,1</sub> | 3.50E+05              | Slower Decrease, Higher Score | 8.86E+04                | 9               | 0.10                  | 23                  | 21                 |
| UNC (L)    | GM2        | dFA <sub>1,0</sub> | -3.31E+01             | Slower Increase, Higher Score | 2.97E+01                | 13              | 0.94                  | 28                  | 26                 |
| ARC-FT (L) | RL2        | dRD <sub>2,1</sub> | -2.95E+04             | Faster Decrease, Higher Score | 5.39E+04                | 13              | 0.88                  | 28                  | 26                 |
| ARC-FT (R) | RL2        | dRD <sub>2,1</sub> | 4.90E+03              | Slower Decrease, Higher Score | 5.00E+04                | 11              | 0.96                  | 26                  | 24                 |
| ARC-TP (R) | RL2        | dRD <sub>2,1</sub> | 2.83E+04              | Slower Decrease, Higher Score | 3.35E+04                | 13              | 0.88                  | 28                  | 26                 |
| CF-M (L)   | RL2        | dRD <sub>2,1</sub> | -3.19E+04             | Faster Decrease, Higher Score | 2.12E+04                | 13              | 0.88                  | 28                  | 26                 |
| CF-M (R)   | RL2        | dRD <sub>2,1</sub> | -1.18E+05             | Faster Decrease, Higher Score | 4.43E+04                | 13              | 0.57                  | 28                  | 26                 |
| CGC (L)    | RL2        | dRD <sub>2,1</sub> | -2.36E+04             | Faster Decrease, Higher Score | 3.54E+04                | 13              | 0.88                  | 28                  | 26                 |
| CT-M (L)   | RL2        | dRD <sub>2,1</sub> | -2.62E+04             | Faster Decrease, Higher Score | 3.26E+04                | 13              | 0.88                  | 28                  | 26                 |
| CT-M (R)   | RL2        | dRD <sub>2,1</sub> | -1.55E+04             | Faster Decrease, Higher Score | 3.23E+04                | 13              | 0.88                  | 28                  | 26                 |
| CT-Par (R) | RL2        | dRD <sub>2,1</sub> | -5.32E+04             | Faster Decrease, Higher Score | 4.26E+04                | 13              | 0.88                  | 28                  | 26                 |
| CT-PM (R)  | RL2        | dRD <sub>2,1</sub> | -1.22E+04             | Faster Decrease, Higher Score | 3.01E+04                | 13              | 0.88                  | 28                  | 26                 |
| IFOF (L)   | RL2        | dRD <sub>2,1</sub> | 2.31E+04              | Slower Decrease, Higher Score | 4.25E+04                | 13              | 0.88                  | 28                  | 26                 |
| ILF (L)    | RL2        | dRD <sub>2,1</sub> | 1.15E+04              | Slower Decrease, Higher Score | 5.89E+04                | 10              | 0.96                  | 25                  | 23                 |
| SLF (L)    | RL2        | dRD <sub>2,1</sub> | -3.37E+04             | Faster Decrease, Higher Score | 3.79E+04                | 12              | 0.88                  | 27                  | 25                 |
| CT-PFC (L) | RL2        | dRD <sub>2,1</sub> | 1.13E+04              | Slower Decrease, Higher Score | 2.51E+04                | 13              | 0.88                  | 28                  | 26                 |

Table 3.2. Longitudinal Mixed Model Results in the Full-term Sample

Mixed models predicting MSEL scores at age 2 from longitudinal tract-based WM were conducted. Findings which were significant for the full sample are shown below for the full-term-only sample for comparison. Models were corrected for gestational age at birth, sex, gestation number, maternal education, age at testing, MSEL test date, and scanner variables. No results survived FDR correction.

| Tract      | MSEL Score | Effect             | Estimate <sup>a</sup> | Trend <sup>b</sup>            | Full-Term               |                 |                       |                     |                    |
|------------|------------|--------------------|-----------------------|-------------------------------|-------------------------|-----------------|-----------------------|---------------------|--------------------|
|            |            |                    |                       |                               | Std. Error <sup>c</sup> | DF <sup>d</sup> | FDR Pval <sup>f</sup> | N Subs <sup>g</sup> | N Obs <sup>h</sup> |
| SLF (R)    | ELC2       | dAD <sub>2,1</sub> | 9.87E+04              | Slower Decrease, Higher Score | 7.61E+04                | 22              | 0.84                  | 36                  | 35                 |
| UNC (L)    | GM2        | dFA <sub>1,0</sub> | 8.87E+00              | Faster Increase, Higher Score | 3.17E+01                | 26              | 1.00                  | 40                  | 39                 |
| ARC-FT (L) | RL2        | dRD <sub>2,1</sub> | 3.86E+04              | Slower Decrease, Higher Score | 2.40E+04                | 26              | 0.71                  | 30                  | 39                 |
| ARC-FT (R) | RL2        | dRD <sub>2,1</sub> | 3.71E+04              | Slower Decrease, Higher Score | 2.57E+04                | 27              | 0.71                  | 40                  | 40                 |
| ARC-TP (R) | RL2        | dRD <sub>2,1</sub> | 3.40E+04              | Slower Decrease, Higher Score | 2.12E+04                | 27              | 0.71                  | 40                  | 40                 |
| CF-M (L)   | RL2        | dRD <sub>2,1</sub> | -1.12E+04             | Faster Decrease, Higher Score | 2.19E+04                | 26              | 0.99                  | 40                  | 39                 |
| CF-M (R)   | RL2        | dRD <sub>2,1</sub> | 1.56E+03              | Slower Decrease, Higher Score | 2.52E+04                | 26              | 0.99                  | 40                  | 39                 |
| CGC (L)    | RL2        | dRD <sub>2,1</sub> | 4.92E+04              | Slower Decrease, Higher Score | 2.41E+04                | 24              | 0.71                  | 38                  | 37                 |
| CT-M (L)   | RL2        | dRD <sub>2,1</sub> | 8.85E+03              | Slower Decrease, Higher Score | 2.62E+04                | 27              | 0.99                  | 41                  | 40                 |
| CT-M (R)   | RL2        | dRD <sub>2,1</sub> | -4.72E+03             | Faster Decrease, Higher Score | 2.49E+04                | 27              | 0.99                  | 41                  | 40                 |
| CT-Par (R) | RL2        | dRD <sub>2,1</sub> | 8.38E+03              | Slower Decrease, Higher Score | 1.62E+04                | 27              | 0.08                  | 41                  | 40                 |
| CT-PM (R)  | RL2        | dRD <sub>2,1</sub> | -1.36E+03             | Faster Decrease, Higher Score | 2.36E+04                | 27              | 0.99                  | 41                  | 40                 |
| IFOF (L)   | RL2        | dRD <sub>2,1</sub> | 1.79E+04              | Slower Decrease, Higher Score | 2.10E+04                | 27              | 0.99                  | 41                  | 40                 |
| ILF (L)    | RL2        | dRD <sub>2,1</sub> | 2.57E+04              | Slower Decrease, Higher Score | 1.93E+04                | 24              | 0.71                  | 38                  | 37                 |
| SLF (L)    | RL2        | dRD <sub>2,1</sub> | 5.99E+03              | Slower Decrease, Higher Score | 1.79E+04                | 24              | 0.99                  | 38                  | 37                 |
| CT-PFC (L) | RL2        | dRD <sub>2,1</sub> | -2.39E+04             | Faster Decrease, Higher Score | 2.06E+04                | 26              | 0.82                  | 40                  | 39                 |

<sup>a</sup>Model estimate

<sup>b</sup>Trend: higher MSEL scores at age 2 are predicted by slower decreases over time in AD or RD (positive estimates), slower increases in FA (negative estimates), faster decreases in AD or RD, or greater FA at birth (positive estimate).

<sup>c</sup>Standard error

<sup>d</sup>Degrees of freedom

<sup>f</sup>FDR-corrected p-value

<sup>g</sup>Number of unique subjects in the analysis

<sup>h</sup>Number of total subjects in the analysis, treating one twin from each pair as repeated measures

**Section 4: Twin versus Singleton Samples**

The sample was split into twins and singletons and for unadjusted correlations which are not controlled for gestation number.

*Figure 4.1. Unadjusted Correlations between WM at Birth and Cognition at 1 and 2 in Twin and Singleton Samples*  
 Unadjusted (raw) correlations between WM at birth and MSEL scores at ages 1 and 2 are shown for twins and singletons. Correlations are presented in order to compare the direction and magnitude of effect sizes can be visualized; very few results survive FDR correction.

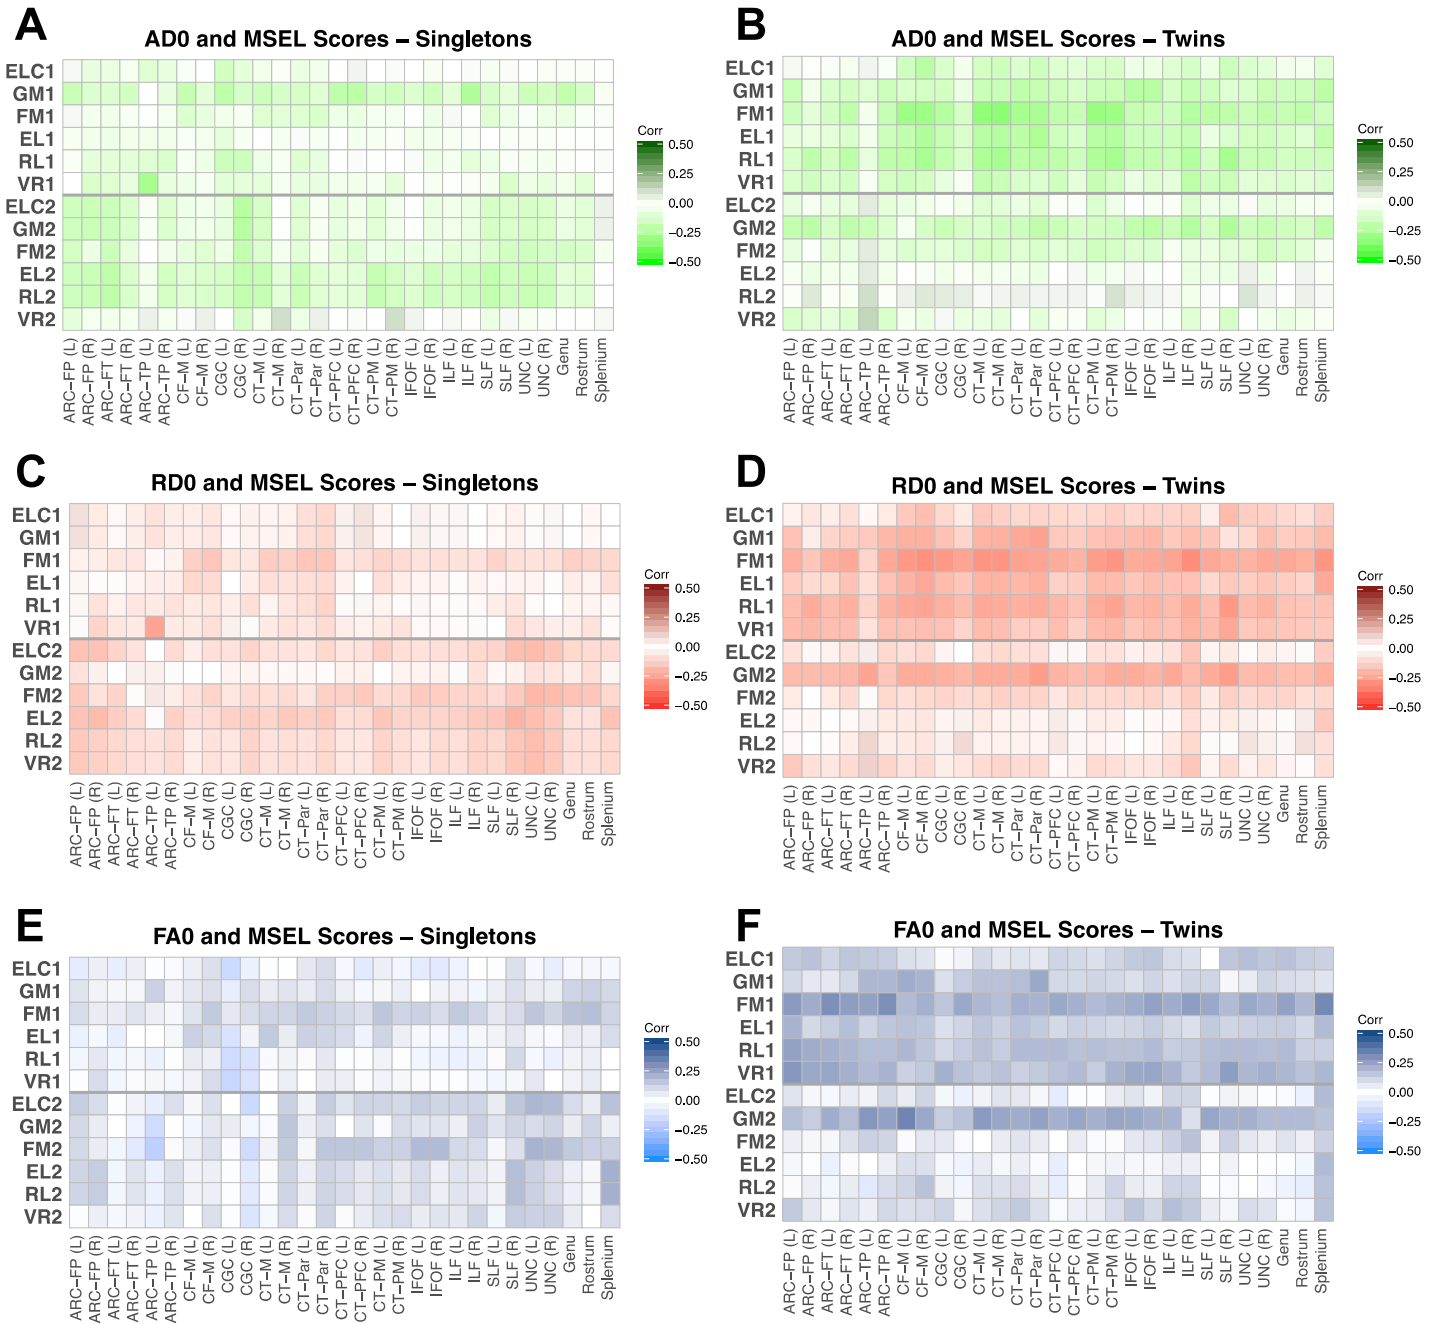

**Figure 4.2. Unadjusted Correlations between WM at Age 1 and Cognition at 1 and 2 in Twin and Singleton Samples**  
 Unadjusted (raw) correlations between WM at age 1 and MSEL scores at ages 1 and 2 are shown for twins and singletons. Correlations are presented in order to compare the direction and magnitude of effect sizes can be visualized; very few results survive FDR correction.

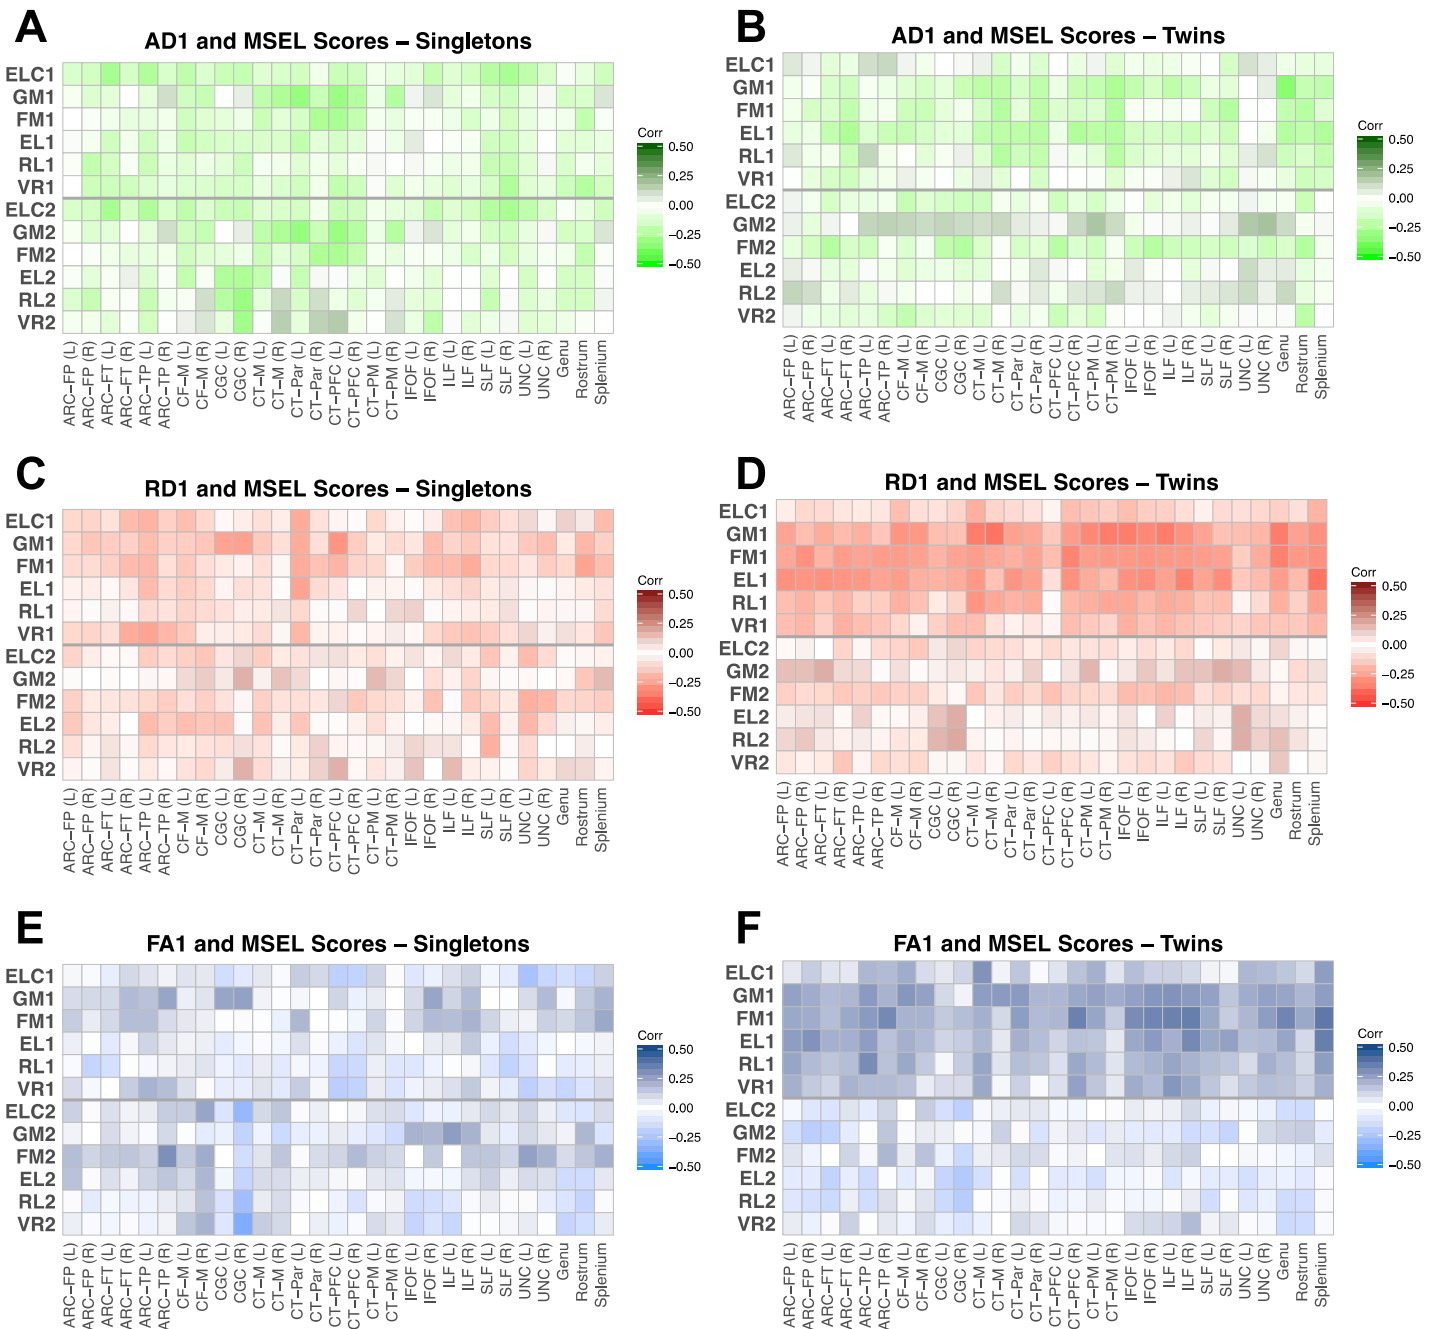

Figure 4.3. Unadjusted Correlations between WM at Age 2 and Cognition at 2 in Twin and Singleton Samples

Unadjusted (raw) correlations between WM at age 2 and MSEL scores at age 2 are shown for twins and singletons. Correlations are presented in order to compare the direction and magnitude of effect sizes can be visualized; very few results survive FDR correction.

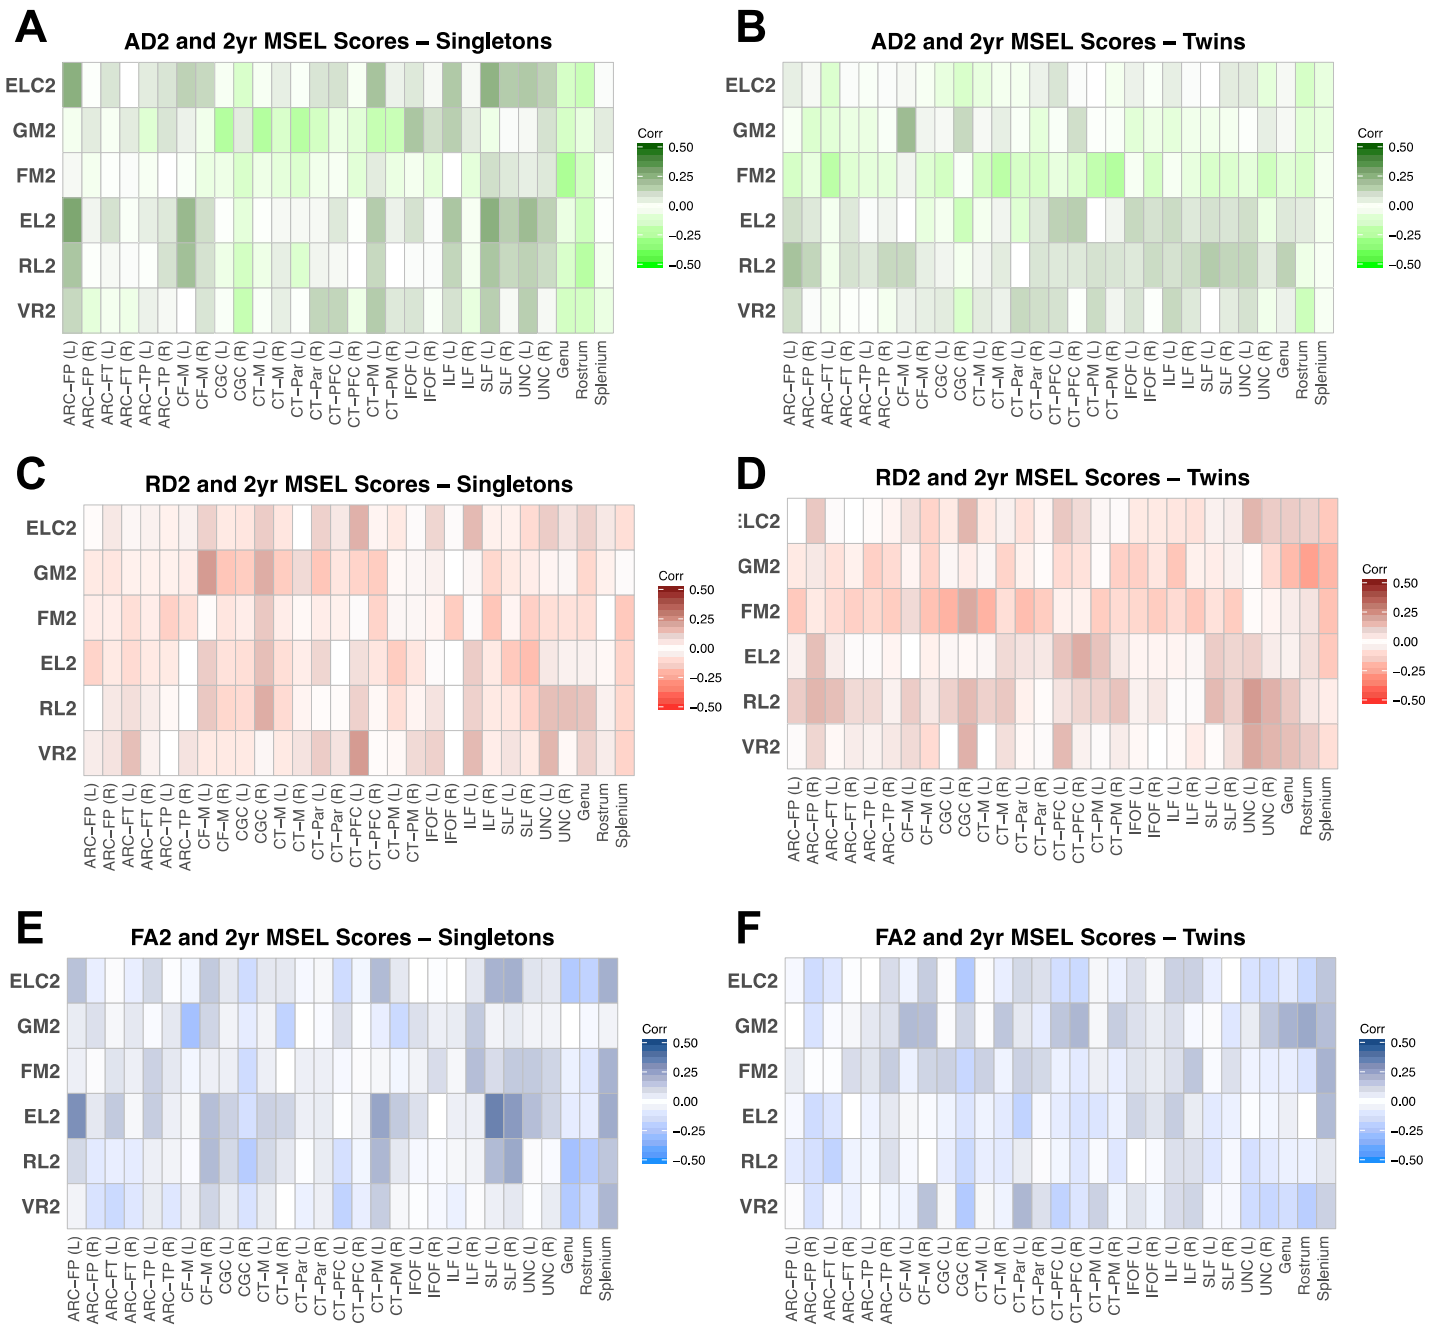

**Section 5: Mixed Effects Models**

Primary findings were replicated using mixed effects models to account for the relatedness between twin participants, as one twin from each pair is treated as a repeated measure.

*Figure 5.1. Mixed Model Findings between WM in Neonates, 1-yr-olds, and 2-yr-olds and Cognition at 1*  
Mixed effect models corrected for gestational age at birth, sex, gestation number, maternal education, age at testing, MSEL test date, and scanner variables are presented for associations between WM in neonates, 1-yr-olds and 2-yr-olds and MSEL scores at ages 1 and 2. Shaded block represent results which survive FDR correction.

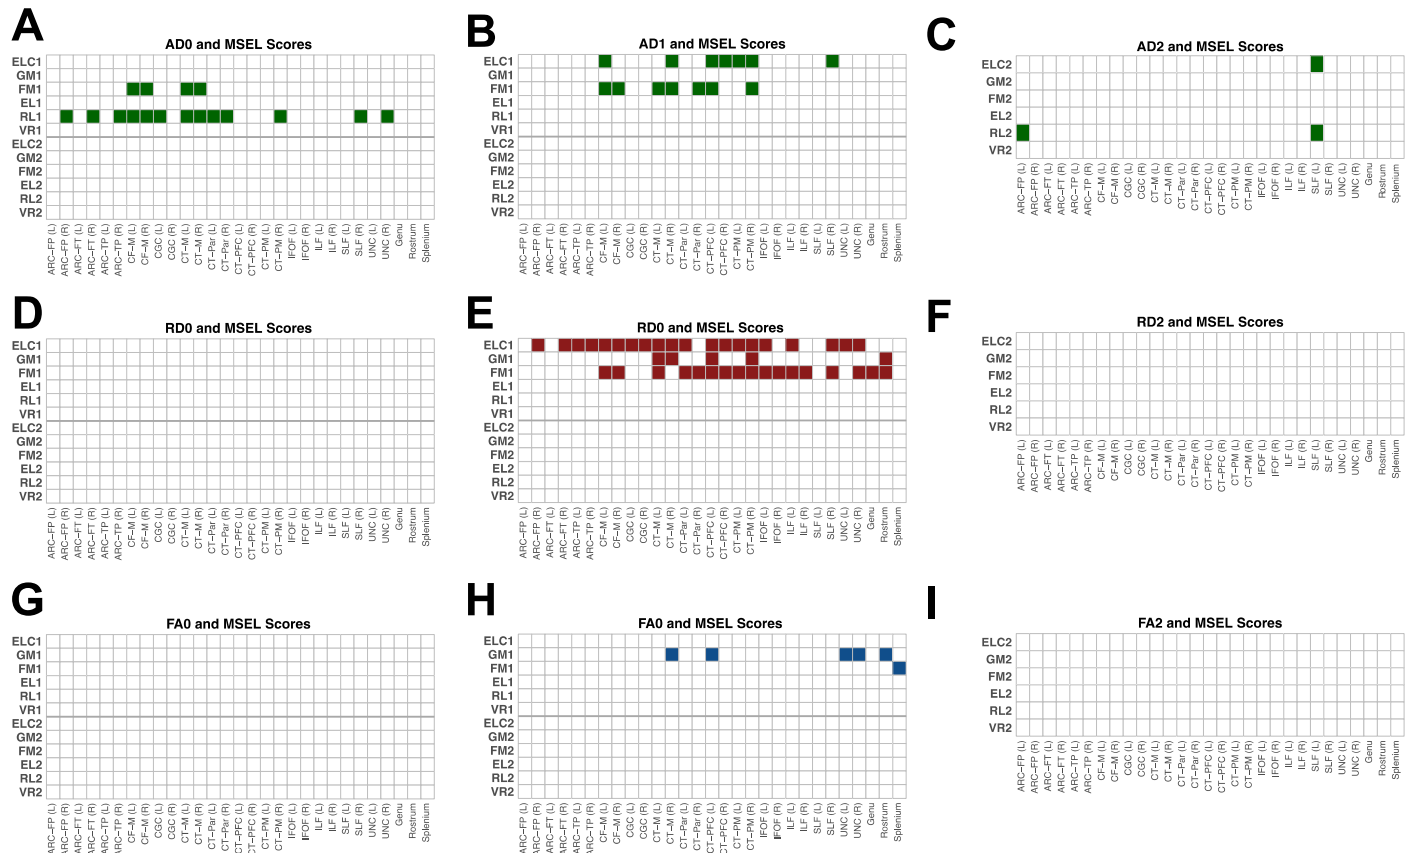



## Section 6: Correcting Correlations between WM and Cognition for Age and Sex Only

Table 6.1.a: Comparison between Age-Sex Corrected and Unadjusted Correlations – AD at birth and MSEL Scores at age 1

Tables display Pearson's correlations by each tract with FDR-corrected p-values. Age-Sex models are corrected for gestational age at birth and age at MSEL 1-year testing. Cells highlighted in yellow are significant in one model (i.e. unadjusted *or* Age-Sex), cells in yellow are significant in both models, and cells highlighted in gray are of a similar magnitude/trend to those significant in the other model.

| Tract    | Age - Sex<br>AD 0 - ELC 1 |          | Unadjusted<br>AD 0 - ELC 1 |          | Age - Sex<br>AD 0 - GM1 |          | Unadjusted<br>AD 0 - GM1 |          | Age - Sex<br>AD 0 - FM1 |          | Unadjusted<br>AD 0 - FM1 |           | Age - Sex<br>AD 0 - EL 1 |          | Unadjusted<br>AD 0 - EL 1 |          | Age - Sex<br>AD 0 - RL 1 |          | Unadjusted<br>AD 0 - RL 1 |          | Age - Sex<br>AD 0 - VR1 |          | Unadjusted<br>AD 0 - VR1 |          |
|----------|---------------------------|----------|----------------------------|----------|-------------------------|----------|--------------------------|----------|-------------------------|----------|--------------------------|-----------|--------------------------|----------|---------------------------|----------|--------------------------|----------|---------------------------|----------|-------------------------|----------|--------------------------|----------|
|          | Pearson's r               | fdr Pval | Pearson's r                | fdr Pval | Pearson's r             | fdr Pval | Pearson's r              | fdr Pval | Pearson's r             | fdr Pval | Pearson's r              | fdr Pval  | Pearson's r              | fdr Pval | Pearson's r               | fdr Pval | Pearson's r              | fdr Pval | Pearson's r               | fdr Pval | Pearson's r             | fdr Pval | Pearson's r              | fdr Pval |
| ARC_FP_L | 0.01                      | 0.83     | 0.00                       | 0.96     | 0.11                    | 0.12     | -0.13                    | 0.06     | 0.01                    | 0.85     | -0.14                    | 0.0214+   | 0.01                     | 0.88     | -0.07                     | 0.27     | 0.03                     | 0.64     | 0.07                      | 0.25     | 0.01                    | 0.91     | -0.04                    | 0.49     |
| ARC_FP_R | 0.04                      | 0.56     | -0.06                      | 0.40     | -0.04                   | 0.54     | -0.04                    | 0.50     | -0.02                   | 0.73     | -0.10                    | 0.13      | -0.03                    | 0.80     | -0.07                     | 0.29     | -0.11                    | 0.13     | -0.14                     | 0.0436+  | -0.08                   | 0.79     | -0.11                    | 0.25     |
| ARC_FT_L | -0.05                     | 0.49     | -0.06                      | 0.40     | -0.06                   | 0.30     | -0.08                    | 0.18     | -0.04                   | 0.51     | -0.14                    | 0.0193+   | -0.02                    | 0.80     | -0.08                     | 0.21     | -0.07                    | 0.25     | -0.11                     | 0.09     | -0.05                   | 0.79     | -0.09                    | 0.25     |
| ARC_FT_R | 0.05                      | 0.49     | 0.05                       | 0.40     | 0.08                    | 0.23     | -0.10                    | 0.11     | 0.07                    | 0.42     | -0.18                    | 0.0034++  | 0.04                     | 0.70     | -0.10                     | 0.11     | 0.11                     | 0.13     | -0.15                     | 0.0187+  | 0.03                    | 0.79     | -0.09                    | 0.25     |
| ARC_TP_L | 0.02                      | 0.80     | -0.06                      | 0.40     | -0.04                   | 0.57     | -0.05                    | 0.51     | 0.03                    | 0.73     | -0.08                    | 0.26      | 0.01                     | 0.94     | -0.08                     | 0.26     | -0.07                    | 0.36     | -0.08                     | 0.24     | -0.07                   | 0.79     | -0.12                    | 0.25     |
| ARC_TP_R | -0.06                     | 0.47     | -0.06                      | 0.40     | -0.06                   | 0.33     | -0.08                    | 0.16     | -0.05                   | 0.42     | -0.17                    | 0.0036++  | -0.06                    | 0.53     | -0.13                     | 0.06     | -0.12                    | 0.09     | -0.15                     | 0.0187+  | -0.03                   | 0.79     | -0.09                    | 0.25     |
| CF_M_L   | 0.12                      | 0.12     | 0.11                       | 0.24     | -0.11                   | 0.12     | -0.13                    | 0.06     | -0.16                   | 0.0274+  | -0.25                    | <0.001+++ | -0.08                    | 0.53     | -0.12                     | 0.06     | -0.11                    | 0.13     | -0.14                     | 0.0326+  | -0.05                   | 0.79     | -0.10                    | 0.25     |
| CF_M_R   | 0.15                      | 0.09     | 0.14                       | 0.17     | -0.09                   | 0.19     | -0.10                    | 0.11     | -0.17                   | 0.0274+  | -0.24                    | <0.001+++ | -0.13                    | 0.43     | -0.17                     | 0.0397+  | -0.17                    | 0.0443+  | -0.18                     | 0.0154+  | 0.05                    | 0.79     | -0.08                    | 0.27     |
| Cing_L   | -0.15                     | 0.09     | -0.15                      | 0.17     | -0.14                   | 0.10     | -0.14                    | 0.06     | -0.12                   | 0.15     | -0.19                    | 0.0018++  | -0.12                    | 0.43     | -0.15                     | 0.0397+  | -0.17                    | 0.0443+  | -0.17                     | 0.0154+  | -0.05                   | 0.79     | -0.06                    | 0.40     |
| Cing_R   | -0.06                     | 0.47     | -0.08                      | 0.34     | -0.07                   | 0.27     | -0.08                    | 0.19     | 0.04                    | 0.51     | -0.12                    | 0.0404+   | -0.06                    | 0.63     | -0.10                     | 0.14     | -0.12                    | 0.10     | -0.13                     | 0.05     | 0.01                    | 0.91     | -0.03                    | 0.61     |
| CT_M_L   | 0.14                      | 0.09     | 0.12                       | 0.21     | 0.11                    | 0.12     | -0.14                    | 0.06     | -0.16                   | 0.0274+  | -0.27                    | <0.001+++ | 0.07                     | 0.53     | -0.13                     | 0.06     | -0.14                    | 0.07     | -0.17                     | 0.0154+  | 0.07                    | 0.79     | -0.13                    | 0.25     |
| CT_M_R   | -0.14                     | 0.09     | -0.12                      | 0.21     | -0.10                   | 0.12     | -0.13                    | 0.06     | -0.18                   | 0.0274+  | -0.28                    | <0.001+++ | -0.10                    | 0.50     | -0.16                     | 0.0397+  | -0.14                    | 0.07     | -0.17                     | 0.0154+  | -0.05                   | 0.79     | -0.10                    | 0.25     |
| CT_Par_L | 0.12                      | 0.12     | 0.11                       | 0.24     | -0.13                   | 0.10     | -0.15                    | 0.06     | -0.15                   | 0.0452+  | -0.24                    | <0.001+++ | -0.07                    | 0.53     | -0.12                     | 0.06     | -0.14                    | 0.07     | -0.17                     | 0.0154+  | -0.04                   | 0.79     | -0.09                    | 0.25     |
| CT_Par_R | 0.14                      | 0.09     | 0.13                       | 0.21     | 0.11                    | 0.12     | -0.13                    | 0.06     | -0.15                   | 0.0367+  | -0.24                    | <0.001+++ | -0.11                    | 0.43     | -0.16                     | 0.0397+  | -0.15                    | 0.07     | -0.16                     | 0.0154+  | 0.04                    | 0.79     | -0.08                    | 0.27     |
| CT_PFC_L | -0.07                     | 0.47     | -0.07                      | 0.34     | -0.12                   | 0.12     | -0.13                    | 0.06     | -0.07                   | 0.42     | -0.18                    | 0.0033++  | -0.04                    | 0.70     | -0.10                     | 0.12     | -0.08                    | 0.21     | -0.11                     | 0.09     | -0.04                   | 0.79     | -0.08                    | 0.27     |
| CT_PFC_R | -0.06                     | 0.47     | -0.06                      | 0.40     | -0.12                   | 0.11     | -0.13                    | 0.06     | 0.06                    | 0.42     | -0.17                    | 0.0035++  | -0.04                    | 0.66     | -0.10                     | 0.12     | -0.06                    | 0.29     | -0.09                     | 0.14     | -0.01                   | 0.91     | -0.05                    | 0.47     |
| CT_PM_L  | 0.10                      | 0.21     | 0.09                       | 0.33     | 0.08                    | 0.19     | -0.12                    | 0.07     | 0.11                    | 0.18     | -0.23                    | 0.0001+++ | 0.09                     | 0.53     | -0.15                     | 0.0397+  | 0.10                     | 0.13     | -0.14                     | 0.0271+  | 0.03                    | 0.79     | -0.10                    | 0.25     |
| CT_PM_R  | 0.11                      | 0.20     | -0.09                      | 0.31     | -0.10                   | 0.13     | -0.12                    | 0.06     | -0.11                   | 0.18     | -0.23                    | 0.0001+++ | -0.09                    | 0.53     | -0.15                     | 0.0397+  | -0.13                    | 0.09     | -0.16                     | 0.0172+  | -0.04                   | 0.79     | -0.09                    | 0.25     |
| IFOF_L   | -0.04                     | 0.56     | -0.05                      | 0.40     | -0.13                   | 0.10     | -0.14                    | 0.06     | 0.06                    | 0.42     | -0.15                    | 0.0096++  | -0.07                    | 0.53     | -0.12                     | 0.06     | -0.08                    | 0.25     | -0.10                     | 0.09     | 0.03                    | 0.79     | -0.02                    | 0.77     |
| IFOF_R   | 0.06                      | 0.47     | 0.06                       | 0.40     | 0.14                    | 0.10     | -0.15                    | 0.06     | 0.06                    | 0.42     | -0.16                    | 0.0064++  | 0.07                     | 0.53     | -0.12                     | 0.06     | 0.10                     | 0.13     | -0.13                     | 0.0436+  | 0.00                    | 0.99     | -0.05                    | 0.47     |
| ILF_L    | -0.05                     | 0.49     | -0.07                      | 0.34     | -0.08                   | 0.22     | -0.09                    | 0.16     | 0.06                    | 0.42     | -0.13                    | 0.0259+   | -0.06                    | 0.53     | -0.11                     | 0.09     | -0.08                    | 0.21     | -0.11                     | 0.09     | 0.01                    | 0.91     | -0.04                    | 0.57     |
| ILF_R    | -0.08                     | 0.38     | -0.09                      | 0.31     | -0.15                   | 0.10     | -0.16                    | 0.06     | -0.10                   | 0.24     | -0.18                    | 0.0025++  | -0.06                    | 0.53     | -0.12                     | 0.06     | -0.12                    | 0.09     | -0.16                     | 0.0172+  | -0.05                   | 0.79     | -0.10                    | 0.25     |
| SIF_L    | 0.06                      | 0.47     | 0.06                       | 0.40     | 0.11                    | 0.12     | -0.11                    | 0.10     | 0.11                    | 0.19     | -0.19                    | 0.0025++  | 0.01                     | 0.94     | -0.04                     | 0.51     | 0.07                     | 0.26     | 0.09                      | 0.14     | 0.06                    | 0.79     | -0.09                    | 0.27     |
| SIF_R    | -0.09                     | 0.38     | -0.10                      | 0.31     | -0.06                   | 0.37     | -0.05                    | 0.40     | 0.07                    | 0.42     | -0.17                    | 0.0077++  | -0.03                    | 0.79     | -0.07                     | 0.26     | 0.13                     | 0.09     | -0.15                     | 0.0271+  | -0.10                   | 0.79     | -0.12                    | 0.25     |
| UNC_L    | -0.07                     | 0.47     | -0.08                      | 0.34     | -0.11                   | 0.12     | -0.09                    | 0.14     | -0.05                   | 0.42     | -0.16                    | 0.0074++  | -0.05                    | 0.65     | -0.10                     | 0.12     | -0.10                    | 0.13     | -0.10                     | 0.11     | -0.04                   | 0.79     | -0.05                    | 0.47     |
| UNC_R    | 0.06                      | 0.47     | 0.08                       | 0.34     | -0.13                   | 0.10     | -0.12                    | 0.07     | 0.07                    | 0.42     | -0.18                    | 0.0025++  | -0.05                    | 0.65     | -0.10                     | 0.11     | -0.11                    | 0.13     | 0.11                      | 0.09     | 0.04                    | 0.79     | -0.06                    | 0.40     |
| Genu     | 0.05                      | 0.49     | 0.05                       | 0.40     | 0.12                    | 0.12     | -0.12                    | 0.06     | 0.06                    | 0.42     | -0.18                    | 0.0034++  | -0.03                    | 0.77     | -0.09                     | 0.14     | -0.05                    | 0.40     | 0.08                      | 0.20     | 0.02                    | 0.91     | -0.06                    | 0.42     |
| Rost     | -0.04                     | 0.52     | -0.05                      | 0.40     | -0.10                   | 0.12     | -0.10                    | 0.11     | -0.05                   | 0.43     | -0.17                    | 0.0034++  | -0.02                    | 0.80     | -0.08                     | 0.19     | -0.06                    | 0.34     | -0.07                     | 0.20     | -0.04                   | 0.79     | -0.06                    | 0.40     |
| Splen    | -0.06                     | 0.47     | -0.08                      | 0.34     | -0.09                   | 0.16     | -0.10                    | 0.11     | 0.05                    | 0.42     | -0.13                    | 0.0256+   | 0.07                     | 0.53     | -0.12                     | 0.07     | 0.06                     | 0.29     | -0.09                     | 0.14     | 0.01                    | 0.91     | -0.05                    | 0.47     |

Table 6.1.b: Comparison between Age-Sex Corrected and Unadjusted Correlations – RD at birth and MSEL Scores at age 1

Tables display Pearson’s correlations by each tract with FDR-corrected p-values. Age-Sex models are corrected for gestational age at birth and age at MSEL 1-year testing. Cells highlighted in yellow are significant in one model (i.e. unadjusted *or* Age-Sex), cells in yellow are significant in both models, and cells highlighted in gray are of a similar magnitude/trend to those significant in the other model.

| Tract    | Age - Sex<br>RD 0 - ELC 1 |          | Unadjusted<br>RD 0 - ELC 1 |          | Age - Sex<br>RD 0 - GM1 |          | Unadjusted<br>RD 0 - GM1 |          | Age - Sex<br>RD 0 - FM1 |          | Unadjusted<br>RD 0 - FM1 |           | Age - Sex<br>RD 0 - EL 1 |          | Unadjusted<br>RD 0 - EL 1 |          | Age - Sex<br>RD 0 - RL 1 |          | Unadjusted<br>RD 0 - RL 1 |          | Age - Sex<br>RD 0 - VR 1 |          | Unadjusted<br>RD 0 - VR 1 |          |
|----------|---------------------------|----------|----------------------------|----------|-------------------------|----------|--------------------------|----------|-------------------------|----------|--------------------------|-----------|--------------------------|----------|---------------------------|----------|--------------------------|----------|---------------------------|----------|--------------------------|----------|---------------------------|----------|
|          | Pearson's r               | Idr Pval | Pearson's r                | Idr Pval | Pearson's r             | Idr Pval | Pearson's r              | Idr Pval | Pearson's r             | Idr Pval | Pearson's r              | Idr Pval  | Pearson's r              | Idr Pval | Pearson's r               | Idr Pval | Pearson's r              | Idr Pval | Pearson's r               | Idr Pval | Pearson's r              | Idr Pval | Pearson's r               | Idr Pval |
| ARC_IP_L | -0.04                     | 0.50     | -0.02                      | 0.78     | -0.08                   | 0.26     | -0.12                    | 0.10     | 0.05                    | 0.40     | -0.19                    | 0.0013++  | -0.03                    | 0.74     | -0.09                     | 0.15     | -0.05                    | 0.41     | -0.09                     | 0.12     | 0.01                     | 0.89     | -0.08                     | 0.22     |
| ARC_FP_R | -0.08                     | 0.29     | -0.09                      | 0.26     | -0.02                   | 0.78     | -0.03                    | 0.65     | -0.06                   | 0.40     | -0.14                    | 0.0245+   | -0.03                    | 0.74     | -0.07                     | 0.28     | -0.13                    | 0.14     | -0.16                     | 0.0263+  | -0.11                    | 0.81     | -0.13                     | 0.20     |
| ARC_FT_L | -0.07                     | 0.30     | -0.05                      | 0.39     | -0.03                   | 0.59     | -0.06                    | 0.30     | -0.08                   | 0.20     | -0.20                    | 0.0006+++ | -0.02                    | 0.78     | -0.08                     | 0.19     | -0.08                    | 0.26     | -0.11                     | 0.08     | -0.05                    | 0.81     | -0.10                     | 0.20     |
| ARC_FT_R | 0.09                      | 0.23     | 0.09                       | 0.26     | 0.06                    | 0.35     | 0.08                     | 0.17     | 0.10                    | 0.15     | -0.21                    | 0.0003+++ | 0.06                     | 0.62     | -0.12                     | 0.07     | 0.11                     | 0.15     | -0.15                     | 0.0263+  | 0.05                     | 0.81     | -0.10                     | 0.20     |
| ARC_TP_L | 0.05                      | 0.50     | 0.08                       | 0.29     | -0.07                   | 0.38     | -0.07                    | 0.30     | 0.00                    | 0.99     | -0.12                    | 0.07      | -0.01                    | 0.92     | -0.11                     | 0.15     | -0.08                    | 0.30     | -0.09                     | 0.17     | 0.08                     | 0.81     | -0.13                     | 0.20     |
| ARC_TP_R | -0.07                     | 0.29     | -0.07                      | 0.29     | -0.07                   | 0.26     | -0.10                    | 0.11     | -0.08                   | 0.20     | -0.20                    | 0.0004+++ | -0.06                    | 0.61     | -0.13                     | 0.06     | -0.10                    | 0.16     | -0.14                     | 0.0263+  | -0.04                    | 0.81     | -0.09                     | 0.21     |
| CF_M_L   | -0.14                     | 0.10     | -0.12                      | 0.22     | -0.14                   | 0.18     | -0.16                    | 0.0489+  | -0.14                   | 0.0457+  | -0.25                    | <0.001+++ | -0.12                    | 0.28     | -0.17                     | 0.0141+  | -0.13                    | 0.14     | -0.17                     | 0.0227+  | 0.04                     | 0.81     | -0.10                     | 0.20     |
| CF_M_R   | -0.16                     | 0.10     | -0.14                      | 0.22     | -0.12                   | 0.22     | -0.15                    | 0.06     | -0.17                   | 0.0457+  | -0.27                    | <0.001+++ | -0.13                    | 0.28     | -0.18                     | 0.0141+  | -0.14                    | 0.14     | -0.17                     | 0.0227+  | 0.06                     | 0.81     | -0.12                     | 0.20     |
| Cing_L   | -0.10                     | 0.21     | -0.08                      | 0.26     | -0.10                   | 0.22     | -0.13                    | 0.10     | -0.13                   | 0.07     | -0.23                    | 0.0001+++ | -0.07                    | 0.61     | -0.12                     | 0.07     | -0.12                    | 0.14     | -0.14                     | 0.0263+  | -0.01                    | 0.87     | -0.06                     | 0.27     |
| Cing_R   | 0.07                      | 0.29     | 0.07                       | 0.30     | -0.08                   | 0.26     | -0.12                    | 0.10     | 0.09                    | 0.17     | -0.21                    | 0.0005+++ | -0.07                    | 0.61     | -0.13                     | 0.07     | -0.10                    | 0.18     | -0.14                     | 0.0386+  | 0.02                     | 0.87     | -0.04                     | 0.48     |
| CT_M_L   | 0.13                      | 0.10     | 0.11                       | 0.22     | -0.11                   | 0.22     | -0.14                    | 0.06     | -0.15                   | 0.0457+  | -0.26                    | <0.001+++ | -0.11                    | 0.28     | -0.17                     | 0.0158+  | -0.11                    | 0.15     | -0.15                     | 0.0263+  | 0.05                     | 0.81     | -0.11                     | 0.20     |
| CT_M_R   | -0.13                     | 0.10     | -0.11                      | 0.23     | -0.11                   | 0.22     | -0.14                    | 0.06     | -0.14                   | 0.0457+  | -0.26                    | <0.001+++ | -0.10                    | 0.38     | -0.16                     | 0.0175+  | -0.12                    | 0.14     | -0.16                     | 0.0227+  | -0.04                    | 0.81     | -0.11                     | 0.20     |
| CT_Par_L | -0.13                     | 0.10     | -0.11                      | 0.22     | -0.13                   | 0.18     | -0.16                    | 0.0490+  | -0.15                   | 0.0457+  | -0.25                    | <0.001+++ | -0.11                    | 0.28     | -0.16                     | 0.0170+  | -0.12                    | 0.14     | -0.16                     | 0.0227+  | -0.02                    | 0.87     | -0.09                     | 0.21     |
| CT_Par_R | -0.14                     | 0.10     | -0.12                      | 0.22     | -0.14                   | 0.18     | -0.16                    | 0.0489+  | -0.14                   | 0.0457+  | -0.25                    | <0.001+++ | -0.12                    | 0.28     | -0.18                     | 0.0141+  | -0.14                    | 0.14     | -0.17                     | 0.0227+  | 0.04                     | 0.81     | -0.10                     | 0.20     |
| CT_PFC_L | -0.07                     | 0.29     | -0.06                      | 0.30     | -0.08                   | 0.26     | -0.10                    | 0.11     | -0.08                   | 0.20     | -0.20                    | 0.0004+++ | -0.03                    | 0.74     | -0.10                     | 0.11     | -0.07                    | 0.29     | -0.10                     | 0.09     | -0.04                    | 0.81     | -0.09                     | 0.21     |
| CT_PFC_R | 0.05                      | 0.43     | -0.05                      | 0.43     | -0.08                   | 0.26     | -0.10                    | 0.11     | 0.07                    | 0.22     | -0.19                    | 0.0006+++ | -0.02                    | 0.78     | -0.09                     | 0.15     | -0.05                    | 0.40     | -0.08                     | 0.14     | -0.02                    | 0.87     | -0.07                     | 0.26     |
| CT_PM_L  | 0.11                      | 0.18     | 0.09                       | 0.25     | 0.06                    | 0.34     | -0.10                    | 0.11     | 0.13                    | 0.07     | -0.24                    | <0.001+++ | 0.09                     | 0.45     | -0.15                     | 0.0254+  | 0.10                     | 0.17     | -0.14                     | 0.0263+  | 0.04                     | 0.81     | -0.11                     | 0.20     |
| CT_PM_R  | -0.11                     | 0.18     | -0.09                      | 0.25     | -0.08                   | 0.26     | -0.11                    | 0.11     | -0.12                   | 0.08     | -0.25                    | <0.001+++ | -0.07                    | 0.61     | -0.13                     | 0.05     | -0.11                    | 0.15     | -0.15                     | 0.0263+  | -0.06                    | 0.81     | -0.12                     | 0.20     |
| IFOF_L   | -0.06                     | 0.30     | -0.07                      | 0.29     | -0.08                   | 0.26     | -0.10                    | 0.11     | 0.09                    | 0.16     | -0.21                    | 0.0003+++ | -0.05                    | 0.62     | -0.12                     | 0.07     | -0.06                    | 0.29     | -0.10                     | 0.09     | -0.01                    | 0.87     | -0.07                     | 0.24     |
| IFOF_R   | 0.08                      | 0.29     | 0.08                       | 0.26     | 0.10                    | 0.22     | -0.12                    | 0.10     | 0.10                    | 0.15     | -0.21                    | 0.0003+++ | 0.05                     | 0.62     | -0.12                     | 0.07     | 0.08                     | 0.23     | 0.12                      | 0.06     | 0.02                     | 0.87     | -0.08                     | 0.21     |
| ILF_L    | -0.07                     | 0.29     | -0.08                      | 0.26     | -0.06                   | 0.33     | -0.08                    | 0.17     | -0.11                   | 0.11     | -0.21                    | 0.0003+++ | -0.05                    | 0.62     | -0.11                     | 0.08     | -0.07                    | 0.29     | -0.10                     | 0.09     | -0.02                    | 0.87     | -0.08                     | 0.22     |
| ILF_R    | -0.09                     | 0.23     | -0.09                      | 0.25     | -0.10                   | 0.24     | -0.12                    | 0.10     | -0.15                   | 0.0457+  | -0.25                    | <0.001+++ | -0.05                    | 0.62     | -0.12                     | 0.07     | -0.10                    | 0.17     | -0.13                     | 0.0335+  | -0.03                    | 0.87     | -0.09                     | 0.21     |
| SLF_L    | 0.06                      | 0.30     | 0.05                       | 0.45     | -0.09                   | 0.26     | -0.10                    | 0.11     | 0.10                    | 0.15     | -0.21                    | 0.0003+++ | -0.02                    | 0.81     | -0.07                     | 0.24     | 0.07                     | 0.28     | 0.10                      | 0.09     | 0.04                     | 0.81     | -0.09                     | 0.21     |
| SLF_R    | -0.14                     | 0.10     | -0.13                      | 0.22     | -0.04                   | 0.58     | -0.04                    | 0.52     | 0.09                    | 0.19     | -0.19                    | 0.0017++  | -0.06                    | 0.62     | -0.10                     | 0.13     | -0.16                    | 0.14     | -0.18                     | 0.0227+  | 0.13                     | 0.81     | -0.14                     | 0.20     |
| UNC_L    | -0.09                     | 0.27     | -0.09                      | 0.25     | -0.07                   | 0.33     | -0.07                    | 0.26     | -0.09                   | 0.16     | -0.20                    | 0.0004+++ | -0.04                    | 0.71     | -0.10                     | 0.11     | -0.09                    | 0.21     | -0.10                     | 0.09     | -0.06                    | 0.81     | -0.08                     | 0.21     |
| UNC_R    | 0.07                      | 0.29     | -0.08                      | 0.26     | 0.10                    | 0.22     | -0.10                    | 0.11     | 0.09                    | 0.16     | -0.21                    | 0.0003+++ | -0.04                    | 0.72     | -0.10                     | 0.11     | 0.09                     | 0.21     | -0.10                     | 0.09     | -0.05                    | 0.81     | -0.08                     | 0.21     |
| Genu     | -0.08                     | 0.29     | -0.08                      | 0.26     | -0.09                   | 0.24     | -0.10                    | 0.11     | -0.12                   | 0.09     | -0.23                    | 0.0001+++ | -0.05                    | 0.62     | -0.11                     | 0.08     | -0.08                    | 0.26     | -0.10                     | 0.09     | -0.04                    | 0.81     | -0.08                     | 0.21     |
| Rost     | -0.07                     | 0.29     | -0.08                      | 0.26     | -0.10                   | 0.22     | -0.11                    | 0.11     | -0.10                   | 0.14     | -0.22                    | 0.0002+++ | -0.03                    | 0.74     | -0.09                     | 0.13     | -0.07                    | 0.29     | -0.09                     | 0.13     | -0.05                    | 0.81     | -0.09                     | 0.21     |
| Splen    | 0.11                      | 0.18     | 0.09                       | 0.25     | -0.09                   | 0.26     | -0.12                    | 0.10     | -0.16                   | 0.0457+  | -0.25                    | <0.001+++ | -0.13                    | 0.28     | -0.18                     | 0.0141+  | -0.06                    | 0.35     | -0.11                     | 0.09     | 0.00                     | 0.96     | -0.07                     | 0.22     |

Table 6.1.c: Comparison between Age-Sex Corrected and Unadjusted Correlations – FA at birth and MSEL Scores at age 1

Tables display Pearson’s correlations by each tract with FDR-corrected p-values. Age-Sex models are corrected for gestational age at birth and age at MSEL 1-year testing. Cells highlighted in yellow are significant in one model (i.e. unadjusted *or* Age-Sex), cells in yellow are significant in both models, and cells highlighted in gray are of a similar magnitude/trend to those significant in the other model.

| Tract    | Age - Sex<br>FA 0 - ELC 1 |          | Unadjusted<br>FA 0 - ELC 1 |          | Age - Sex<br>FA 0 - GMI 1 |          | Unadjusted<br>FA 0 - GMI 1 |          | Age - Sex<br>FA 0 - FM 1 |          | Unadjusted<br>FA 0 - FM 1 |           | Age - Sex<br>FA 0 - EL 1 |          | Unadjusted<br>FA 0 - EL 1 |          | Age - Sex<br>FA 0 - RL 1 |          | Unadjusted<br>FA 0 - RL 1 |          | Age - Sex<br>FA 0 - VR 1 |          | Unadjusted<br>FA 0 - VR 1 |          |
|----------|---------------------------|----------|----------------------------|----------|---------------------------|----------|----------------------------|----------|--------------------------|----------|---------------------------|-----------|--------------------------|----------|---------------------------|----------|--------------------------|----------|---------------------------|----------|--------------------------|----------|---------------------------|----------|
|          | Pearson's r               | Idr Pval | Pearson's r                | Idr Pval | Pearson's r               | Idr Pval | Pearson's r                | Idr Pval | Pearson's r              | Idr Pval | Pearson's r               | Idr Pval  | Pearson's r              | Idr Pval | Pearson's r               | Idr Pval | Pearson's r              | Idr Pval | Pearson's r               | Idr Pval | Pearson's r              | Idr Pval | Pearson's r               | Idr Pval |
| ARC_IP_L | 0.10                      | 0.26     | 0.06                       | 0.41     | 0.01                      | 1.00     | 0.06                       | 0.73     | 0.11                     | 0.14     | 0.23                      | 0.0004+++ | 0.04                     | 0.97     | 0.10                      | 0.22     | 0.09                     | 0.63     | 0.13                      | 0.16     | 0.08                     | 0.84     | 0.13                      | 0.21     |
| ARC_FP_R | 0.14                      | 0.25     | 0.12                       | 0.41     | 0.01                      | 1.00     | 0.02                       | 0.89     | 0.10                     | 0.16     | 0.17                      | 0.0067++  | 0.02                     | 0.97     | 0.05                      | 0.49     | 0.14                     | 0.46     | 0.16                      | 0.16     | 0.13                     | 0.63     | 0.15                      | 0.21     |
| ARC_FT_L | 0.09                      | 0.26     | 0.05                       | 0.46     | -0.03                     | 1.00     | 0.01                       | 0.89     | 0.12                     | 0.14     | 0.23                      | 0.0004+++ | 0.01                     | 0.97     | 0.05                      | 0.44     | 0.08                     | 0.63     | 0.11                      | 0.19     | 0.05                     | 0.84     | 0.10                      | 0.21     |
| ARC_FT_R | 0.14                      | 0.25     | 0.11                       | 0.41     | 0.02                      | 1.00     | 0.04                       | 0.74     | 0.12                     | 0.14     | 0.22                      | 0.0004+++ | 0.06                     | 0.82     | 0.11                      | 0.19     | 0.10                     | 0.63     | 0.12                      | 0.17     | 0.08                     | 0.84     | 0.11                      | 0.21     |
| ARC_TP_L | 0.09                      | 0.32     | 0.11                       | 0.41     | 0.13                      | 0.85     | 0.14                       | 0.31     | 0.09                     | 0.25     | 0.19                      | 0.0066++  | 0.00                     | 1.00     | 0.08                      | 0.31     | 0.06                     | 0.64     | 0.08                      | 0.28     | 0.05                     | 0.84     | 0.11                      | 0.21     |
| ARC_TP_R | 0.09                      | 0.26     | 0.08                       | 0.41     | 0.06                      | 1.00     | 0.09                       | 0.41     | 0.11                     | 0.14     | 0.21                      | 0.0005+++ | 0.05                     | 0.94     | 0.10                      | 0.19     | 0.06                     | 0.64     | 0.09                      | 0.22     | 0.04                     | 0.84     | 0.08                      | 0.21     |
| CF_M_L   | 0.08                      | 0.30     | 0.07                       | 0.41     | 0.09                      | 0.85     | 0.13                       | 0.26     | 0.06                     | 0.31     | 0.15                      | 0.0079++  | 0.10                     | 0.69     | 0.15                      | 0.08     | 0.08                     | 0.63     | 0.13                      | 0.16     | 0.01                     | 1.00     | 0.07                      | 0.28     |
| CF_M_R   | 0.10                      | 0.26     | 0.08                       | 0.41     | 0.09                      | 0.85     | 0.12                       | 0.26     | 0.10                     | 0.14     | 0.20                      | 0.0007+++ | 0.08                     | 0.81     | 0.13                      | 0.11     | 0.05                     | 0.64     | 0.10                      | 0.20     | 0.04                     | 0.84     | 0.10                      | 0.21     |
| Cing_L   | 0.04                      | 0.54     | 0.07                       | 0.41     | 0.04                      | 1.00     | 0.01                       | 0.89     | 0.05                     | 0.35     | 0.12                      | 0.0381+   | 0.05                     | 0.94     | 0.01                      | 0.81     | 0.05                     | 0.64     | 0.00                      | 0.98     | 0.04                     | 0.84     | 0.03                      | 0.63     |
| Cing_R   | 0.04                      | 0.54     | 0.00                       | 0.97     | 0.05                      | 1.00     | 0.10                       | 0.41     | 0.10                     | 0.16     | 0.18                      | 0.0023++  | 0.04                     | 0.97     | 0.08                      | 0.27     | -0.02                    | 0.76     | 0.04                      | 0.56     | -0.04                    | 0.84     | 0.03                      | 0.61     |
| CT_M_L   | 0.08                      | 0.32     | 0.06                       | 0.41     | 0.06                      | 1.00     | 0.09                       | 0.41     | 0.09                     | 0.16     | 0.18                      | 0.0015++  | 0.10                     | 0.69     | 0.15                      | 0.08     | 0.04                     | 0.70     | 0.08                      | 0.22     | 0.00                     | 1.00     | 0.06                      | 0.36     |
| CT_M_R   | 0.06                      | 0.34     | 0.05                       | 0.46     | 0.04                      | 1.00     | 0.09                       | 0.41     | 0.06                     | 0.31     | 0.17                      | 0.0023++  | 0.03                     | 0.97     | 0.09                      | 0.22     | 0.03                     | 0.74     | 0.08                      | 0.22     | 0.02                     | 0.92     | 0.09                      | 0.21     |
| CT_Par_L | 0.09                      | 0.26     | 0.08                       | 0.41     | 0.06                      | 1.00     | 0.10                       | 0.41     | 0.11                     | 0.14     | 0.20                      | 0.0006+++ | 0.10                     | 0.69     | 0.15                      | 0.08     | 0.07                     | 0.64     | 0.11                      | 0.19     | 0.00                     | 1.00     | 0.06                      | 0.36     |
| CT_Par_R | 0.10                      | 0.26     | 0.08                       | 0.41     | 0.10                      | 0.85     | 0.14                       | 0.26     | 0.10                     | 0.16     | 0.20                      | 0.0007+++ | 0.07                     | 0.81     | 0.13                      | 0.11     | 0.08                     | 0.63     | 0.13                      | 0.16     | 0.02                     | 0.92     | 0.08                      | 0.21     |
| CT_PFC_L | 0.07                      | 0.33     | 0.06                       | 0.41     | 0.00                      | 1.00     | 0.04                       | 0.74     | 0.10                     | 0.15     | 0.21                      | 0.0005+++ | 0.04                     | 0.97     | 0.10                      | 0.19     | 0.06                     | 0.64     | 0.10                      | 0.20     | 0.03                     | 0.90     | 0.09                      | 0.21     |
| CT_PFC_R | 0.03                      | 0.54     | 0.03                       | 0.63     | -0.03                     | 1.00     | 0.01                       | 0.89     | 0.07                     | 0.24     | 0.19                      | 0.0013++  | -0.02                    | 0.97     | 0.05                      | 0.40     | 0.03                     | 0.71     | 0.08                      | 0.22     | 0.02                     | 0.92     | 0.08                      | 0.21     |
| CT_PM_L  | 0.08                      | 0.32     | 0.07                       | 0.41     | 0.02                      | 1.00     | 0.05                       | 0.74     | 0.11                     | 0.14     | 0.19                      | 0.0010+++ | 0.07                     | 0.81     | 0.12                      | 0.14     | 0.07                     | 0.64     | 0.10                      | 0.19     | 0.03                     | 0.90     | 0.07                      | 0.25     |
| CT_PM_R  | 0.06                      | 0.33     | 0.06                       | 0.41     | 0.00                      | 1.00     | 0.04                       | 0.74     | 0.09                     | 0.16     | 0.19                      | 0.0010+++ | 0.02                     | 0.97     | 0.08                      | 0.25     | 0.04                     | 0.71     | 0.08                      | 0.22     | 0.05                     | 0.84     | 0.10                      | 0.21     |
| IFOF_L   | 0.07                      | 0.33     | 0.06                       | 0.41     | -0.03                     | 1.00     | 0.01                       | 0.89     | 0.10                     | 0.15     | 0.21                      | 0.0005+++ | 0.01                     | 0.97     | 0.06                      | 0.39     | 0.03                     | 0.74     | 0.07                      | 0.26     | 0.06                     | 0.84     | 0.11                      | 0.21     |
| IFOF_R   | 0.07                      | 0.33     | 0.06                       | 0.41     | 0.00                      | 1.00     | 0.04                       | 0.74     | 0.11                     | 0.14     | 0.22                      | 0.0004+++ | 0.00                     | 0.99     | 0.07                      | 0.29     | 0.04                     | 0.71     | 0.08                      | 0.22     | 0.05                     | 0.84     | 0.10                      | 0.21     |
| ILF_L    | 0.05                      | 0.43     | 0.04                       | 0.56     | 0.00                      | 1.00     | 0.03                       | 0.78     | 0.10                     | 0.14     | 0.21                      | 0.0005+++ | -0.02                    | 0.97     | 0.04                      | 0.49     | 0.01                     | 0.84     | 0.05                      | 0.41     | 0.04                     | 0.84     | 0.09                      | 0.21     |
| ILF_R    | 0.06                      | 0.34     | 0.06                       | 0.41     | -0.01                     | 1.00     | 0.02                       | 0.89     | 0.13                     | 0.14     | 0.22                      | 0.0004+++ | 0.01                     | 0.97     | 0.06                      | 0.38     | 0.02                     | 0.76     | 0.05                      | 0.38     | 0.00                     | 1.00     | 0.05                      | 0.45     |
| SIF_L    | 0.04                      | 0.54     | 0.00                       | 0.97     | 0.01                      | 1.00     | 0.05                       | 0.74     | 0.06                     | 0.31     | 0.17                      | 0.0030++  | 0.03                     | 0.97     | 0.09                      | 0.25     | 0.03                     | 0.71     | 0.08                      | 0.22     | 0.01                     | 0.95     | 0.06                      | 0.33     |
| SIF_R    | 0.15                      | 0.25     | 0.13                       | 0.41     | 0.01                      | 1.00     | 0.02                       | 0.89     | 0.09                     | 0.20     | 0.15                      | 0.0101+   | 0.07                     | 0.81     | 0.09                      | 0.25     | 0.13                     | 0.46     | 0.14                      | 0.16     | 0.12                     | 0.63     | 0.14                      | 0.21     |
| UNC_L    | 0.10                      | 0.26     | 0.10                       | 0.41     | -0.01                     | 1.00     | 0.01                       | 0.89     | 0.13                     | 0.14     | 0.22                      | 0.0004+++ | 0.02                     | 0.97     | 0.08                      | 0.25     | 0.06                     | 0.64     | 0.09                      | 0.22     | 0.07                     | 0.84     | 0.10                      | 0.21     |
| UNC_R    | 0.07                      | 0.33     | 0.07                       | 0.41     | 0.02                      | 1.00     | 0.04                       | 0.74     | 0.09                     | 0.16     | 0.20                      | 0.0007+++ | 0.01                     | 0.97     | 0.07                      | 0.29     | 0.03                     | 0.71     | 0.07                      | 0.28     | 0.05                     | 0.84     | 0.08                      | 0.21     |
| Genu     | 0.10                      | 0.26     | 0.09                       | 0.41     | 0.04                      | 1.00     | 0.07                       | 0.59     | 0.15                     | 0.14     | 0.24                      | 0.0003+++ | 0.05                     | 0.94     | 0.10                      | 0.19     | 0.08                     | 0.63     | 0.11                      | 0.19     | 0.06                     | 0.84     | 0.10                      | 0.21     |
| Rost     | 0.09                      | 0.26     | 0.09                       | 0.41     | 0.05                      | 1.00     | 0.07                       | 0.59     | 0.12                     | 0.14     | 0.20                      | 0.0006+++ | 0.03                     | 0.97     | 0.08                      | 0.26     | 0.06                     | 0.64     | 0.08                      | 0.22     | 0.06                     | 0.84     | 0.09                      | 0.21     |
| Splen    | 0.09                      | 0.26     | 0.06                       | 0.41     | 0.02                      | 1.00     | 0.07                       | 0.59     | 0.17                     | 0.09     | 0.25                      | 0.0002+++ | 0.09                     | 0.69     | 0.14                      | 0.08     | 0.01                     | 0.84     | 0.07                      | 0.26     | 0.02                     | 0.92     | 0.09                      | 0.21     |

Table 6.2.a: Comparison between Age-Sex Corrected and Unadjusted Correlations – AD at birth and MSEL Scores at age 2

Tables display Pearson’s correlations by each tract with FDR-corrected p-values. Age-Sex models are corrected for gestational age at birth and age at MSEL 2-year testing. Cells highlighted in yellow are significant in one model (i.e. unadjusted *or* Age-Sex), cells in yellow are significant in both models, and cells highlighted in gray are of a similar magnitude/trend to those significant in the other model.

| Tract    | Age - Sex<br>AD 0 - ELC 2 |          | Unadjusted<br>AD 0 - ELC 2 |          | Age - Sex<br>AD 0 - GM 2 |          | Unadjusted<br>AD 0 - GM 2 |          | Age - Sex<br>AD 0 - FM 2 |          | Unadjusted<br>AD 0 - FM 2 |          | Age - Sex<br>AD 0 - EL 2 |          | Unadjusted<br>AD 0 - EL 2 |          | Age - Sex<br>AD 0 - RL 2 |          | Unadjusted<br>AD 0 - RL 2 |          | Age - Sex<br>AD 0 - VR 2 |          | Unadjusted<br>AD 0 - VR 2 |          |
|----------|---------------------------|----------|----------------------------|----------|--------------------------|----------|---------------------------|----------|--------------------------|----------|---------------------------|----------|--------------------------|----------|---------------------------|----------|--------------------------|----------|---------------------------|----------|--------------------------|----------|---------------------------|----------|
|          | Pearson's r               | fdr Pval | Pearson's r                | fdr Pval | Pearson's r              | fdr Pval | Pearson's r               | fdr Pval | Pearson's r              | fdr Pval | Pearson's r               | fdr Pval | Pearson's r              | fdr Pval | Pearson's r               | fdr Pval | Pearson's r              | fdr Pval | Pearson's r               | fdr Pval | Pearson's r              | fdr Pval | Pearson's r               | fdr Pval |
| ARC_FP_L | 0.08                      | 0.94     | -0.21                      | 0.0028++ | 0.13                     | 0.21     | -0.14                     | 0.19     | 0.05                     | 0.71     | -0.17                     | 0.0136+  | 0.04                     | 0.93     | -0.16                     | 0.0221+  | 0.03                     | 1.00     | -0.14                     | 0.10     | 0.09                     | 0.96     | -0.17                     | 0.15     |
| ARC_FP_R | -0.05                     | 0.94     | -0.19                      | 0.0090++ | 0.08                     | 0.28     | -0.08                     | 0.27     | 0.01                     | 0.93     | -0.09                     | 0.19     | -0.07                    | 0.93     | -0.19                     | 0.0186+  | 0.02                     | 1.00     | -0.12                     | 0.15     | -0.05                    | 0.96     | -0.13                     | 0.16     |
| ARC_FT_L | -0.10                     | 0.94     | -0.23                      | 0.0028++ | -0.09                    | 0.23     | -0.08                     | 0.23     | -0.07                    | 0.71     | -0.19                     | 0.0071++ | -0.09                    | 0.93     | -0.20                     | 0.0152+  | -0.07                    | 1.00     | -0.17                     | 0.10     | -0.06                    | 0.96     | -0.13                     | 0.15     |
| ARC_FT_R | 0.06                      | 0.94     | -0.22                      | 0.0028++ | 0.15                     | 0.21     | -0.13                     | 0.19     | -0.03                    | 0.77     | -0.16                     | 0.0161+  | -0.02                    | 0.93     | -0.16                     | 0.0215+  | 0.05                     | 1.00     | -0.17                     | 0.10     | 0.06                     | 0.96     | -0.15                     | 0.15     |
| ARC_TP_L | 0.03                      | 0.94     | -0.12                      | 0.11     | 0.10                     | 0.24     | -0.12                     | 0.19     | 0.05                     | 0.74     | -0.07                     | 0.38     | 0.03                     | 0.93     | -0.11                     | 0.16     | 0.00                     | 1.00     | -0.10                     | 0.24     | 0.05                     | 0.96     | -0.01                     | 0.85     |
| ARC_TP_R | -0.08                     | 0.94     | -0.21                      | 0.0028++ | -0.08                    | 0.25     | -0.08                     | 0.25     | -0.03                    | 0.77     | -0.15                     | 0.0207+  | -0.06                    | 0.93     | -0.18                     | 0.0174+  | -0.06                    | 1.00     | -0.16                     | 0.10     | -0.09                    | 0.96     | -0.16                     | 0.15     |
| CF_M_L   | 0.04                      | 0.94     | -0.15                      | 0.0195+  | 0.06                     | 0.39     | -0.06                     | 0.36     | 0.07                     | 0.71     | -0.16                     | 0.0136+  | -0.01                    | 0.93     | -0.11                     | 0.07     | 0.04                     | 1.00     | -0.06                     | 0.33     | -0.01                    | 0.96     | -0.07                     | 0.34     |
| CF_M_R   | -0.03                     | 0.94     | -0.13                      | 0.0366+  | 0.05                     | 0.43     | -0.06                     | 0.37     | -0.06                    | 0.71     | -0.15                     | 0.0173+  | -0.02                    | 0.93     | -0.12                     | 0.05     | 0.06                     | 1.00     | -0.04                     | 0.54     | -0.01                    | 0.96     | -0.07                     | 0.34     |
| Cng_L    | -0.01                     | 0.96     | -0.16                      | 0.0149+  | -0.11                    | 0.21     | -0.11                     | 0.19     | -0.03                    | 0.75     | -0.15                     | 0.0173+  | -0.04                    | 0.93     | -0.17                     | 0.0207+  | 0.04                     | 1.00     | -0.09                     | 0.21     | 0.03                     | 0.96     | -0.06                     | 0.37     |
| Cng_R    | -0.10                     | 0.94     | -0.20                      | 0.0046++ | 0.09                     | 0.23     | -0.10                     | 0.19     | -0.10                    | 0.71     | -0.20                     | 0.0071++ | 0.04                     | 0.93     | -0.16                     | 0.0233+  | 0.00                     | 1.00     | -0.11                     | 0.16     | -0.09                    | 0.96     | -0.15                     | 0.15     |
| CT_M_L   | -0.08                     | 0.94     | -0.21                      | 0.0028++ | 0.10                     | 0.21     | -0.10                     | 0.19     | -0.09                    | 0.71     | -0.20                     | 0.0071++ | -0.05                    | 0.93     | -0.18                     | 0.0174+  | 0.01                     | 1.00     | -0.13                     | 0.10     | 0.05                     | 0.96     | -0.12                     | 0.16     |
| CT_M_R   | -0.03                     | 0.94     | -0.16                      | 0.0129+  | -0.07                    | 0.31     | -0.07                     | 0.27     | -0.05                    | 0.71     | -0.17                     | 0.0136+  | -0.01                    | 0.93     | -0.13                     | 0.0413+  | 0.04                     | 1.00     | -0.08                     | 0.24     | 0.00                     | 0.97     | -0.08                     | 0.30     |
| CT_Par_L | 0.06                      | 0.94     | -0.17                      | 0.0110+  | 0.10                     | 0.23     | -0.10                     | 0.19     | 0.07                     | 0.71     | -0.16                     | 0.0136+  | -0.06                    | 0.93     | -0.16                     | 0.0221+  | 0.00                     | 1.00     | -0.09                     | 0.21     | -0.02                    | 0.96     | -0.08                     | 0.30     |
| CT_Par_R | 0.04                      | 0.94     | -0.17                      | 0.0110+  | 0.11                     | 0.21     | -0.11                     | 0.19     | 0.05                     | 0.71     | -0.15                     | 0.0173+  | -0.05                    | 0.93     | -0.15                     | 0.0221+  | 0.03                     | 1.00     | -0.08                     | 0.25     | -0.02                    | 0.96     | -0.09                     | 0.23     |
| CT_PFC_L | -0.02                     | 0.96     | -0.16                      | 0.0122+  | -0.12                    | 0.21     | -0.13                     | 0.19     | -0.04                    | 0.74     | -0.17                     | 0.0136+  | 0.01                     | 0.93     | -0.13                     | 0.0433+  | 0.00                     | 1.00     | -0.12                     | 0.11     | -0.01                    | 0.96     | -0.10                     | 0.22     |
| CT_PFC_R | -0.01                     | 0.96     | -0.15                      | 0.0217+  | -0.09                    | 0.23     | -0.09                     | 0.20     | -0.07                    | 0.71     | -0.19                     | 0.0071++ | 0.02                     | 0.93     | -0.12                     | 0.07     | 0.02                     | 1.00     | -0.10                     | 0.19     | 0.01                     | 0.96     | -0.08                     | 0.31     |
| CT_PM_L  | 0.07                      | 0.94     | -0.20                      | 0.0028++ | 0.11                     | 0.21     | -0.11                     | 0.19     | 0.07                     | 0.71     | -0.19                     | 0.0071++ | 0.06                     | 0.93     | -0.19                     | 0.0152+  | 0.00                     | 1.00     | -0.12                     | 0.12     | 0.04                     | 0.96     | -0.12                     | 0.16     |
| CT_PM_R  | -0.02                     | 0.94     | -0.16                      | 0.0129+  | 0.08                     | 0.24     | -0.08                     | 0.23     | -0.07                    | 0.71     | -0.19                     | 0.0071++ | -0.04                    | 0.93     | -0.16                     | 0.0219+  | 0.06                     | 1.00     | -0.06                     | 0.33     | 0.02                     | 0.96     | -0.06                     | 0.37     |
| IFOF_L   | 0.03                      | 0.94     | -0.12                      | 0.06     | -0.12                    | 0.21     | -0.12                     | 0.19     | -0.04                    | 0.74     | -0.16                     | 0.0136+  | 0.02                     | 0.93     | -0.11                     | 0.07     | 0.05                     | 1.00     | -0.07                     | 0.31     | 0.04                     | 0.96     | -0.06                     | 0.37     |
| IFOF_R   | 0.01                      | 0.96     | -0.16                      | 0.0149+  | 0.13                     | 0.21     | -0.13                     | 0.19     | 0.04                     | 0.74     | -0.17                     | 0.0136+  | -0.02                    | 0.93     | -0.15                     | 0.0221+  | 0.02                     | 1.00     | -0.10                     | 0.16     | 0.02                     | 0.96     | -0.08                     | 0.30     |
| ILF_L    | 0.00                      | 0.99     | -0.13                      | 0.0354+  | -0.09                    | 0.23     | -0.09                     | 0.21     | 0.00                     | 0.98     | -0.12                     | 0.06     | -0.02                    | 0.93     | -0.13                     | 0.0455+  | 0.02                     | 1.00     | -0.08                     | 0.25     | 0.02                     | 0.96     | -0.07                     | 0.34     |
| ILF_R    | -0.06                     | 0.94     | -0.21                      | 0.0028++ | -0.15                    | 0.21     | -0.14                     | 0.19     | -0.02                    | 0.84     | -0.15                     | 0.0173+  | -0.06                    | 0.93     | -0.19                     | 0.0152+  | -0.03                    | 1.00     | -0.15                     | 0.10     | -0.05                    | 0.96     | -0.13                     | 0.15     |
| SIF_L    | -0.07                     | 0.94     | -0.19                      | 0.0061++ | 0.08                     | 0.25     | -0.08                     | 0.23     | -0.05                    | 0.73     | -0.15                     | 0.0173+  | -0.07                    | 0.93     | -0.19                     | 0.0154+  | 0.02                     | 1.00     | -0.12                     | 0.12     | -0.03                    | 0.96     | -0.10                     | 0.21     |
| SIF_R    | 0.06                      | 0.94     | -0.19                      | 0.0076++ | 0.11                     | 0.21     | -0.11                     | 0.19     | -0.06                    | 0.71     | -0.18                     | 0.0136+  | -0.04                    | 0.93     | -0.18                     | 0.0186+  | 0.03                     | 1.00     | -0.15                     | 0.10     | -0.04                    | 0.96     | -0.11                     | 0.19     |
| UNC_L    | -0.01                     | 0.96     | -0.19                      | 0.0051++ | -0.12                    | 0.21     | -0.12                     | 0.19     | -0.06                    | 0.71     | -0.21                     | 0.0069++ | 0.01                     | 0.93     | -0.15                     | 0.0221+  | 0.02                     | 1.00     | -0.13                     | 0.10     | 0.01                     | 0.96     | -0.10                     | 0.22     |
| UNC_R    | -0.05                     | 0.94     | -0.22                      | 0.0028++ | 0.13                     | 0.21     | -0.13                     | 0.19     | -0.08                    | 0.71     | -0.22                     | 0.0069++ | -0.04                    | 0.93     | -0.19                     | 0.0152+  | 0.00                     | 1.00     | -0.14                     | 0.10     | -0.01                    | 0.96     | -0.11                     | 0.17     |
| Genu     | -0.05                     | 0.94     | -0.19                      | 0.0046++ | 0.10                     | 0.23     | -0.10                     | 0.19     | 0.08                     | 0.71     | -0.21                     | 0.0069++ | 0.01                     | 0.93     | -0.13                     | 0.0430+  | 0.01                     | 1.00     | -0.13                     | 0.10     | -0.03                    | 0.96     | -0.11                     | 0.17     |
| Rost     | -0.04                     | 0.94     | -0.20                      | 0.0028++ | -0.09                    | 0.23     | -0.09                     | 0.21     | -0.06                    | 0.71     | -0.20                     | 0.0071++ | 0.01                     | 0.93     | -0.14                     | 0.0329+  | 0.00                     | 1.00     | -0.14                     | 0.10     | -0.03                    | 0.96     | -0.12                     | 0.16     |
| Splen    | 0.02                      | 0.94     | -0.09                      | 0.13     | 0.11                     | 0.21     | -0.11                     | 0.19     | 0.00                     | 0.98     | -0.10                     | 0.11     | 0.01                     | 0.93     | -0.08                     | 0.17     | 0.05                     | 1.00     | -0.04                     | 0.54     | 0.01                     | 0.96     | -0.06                     | 0.37     |

Table 6.2.b: Comparison between Age-Sex Corrected and Unadjusted Correlations – RD at birth and MSEL Scores at age 2

Tables display Pearson’s correlations by each tract with FDR-corrected p-values. Age-Sex models are corrected for gestational age at birth and age at MSEL 2-year testing. Cells highlighted in yellow are significant in one model (i.e. unadjusted *or* Age-Sex), cells in yellow are significant in both models, and cells highlighted in gray are of a similar magnitude/trend to those significant in the other model.

| Tract    | Age - Sex<br>RD 0 - ELC 2 |          | Unadjusted<br>RD 0 - ELC 2 |           | Age - Sex<br>RD 0 - GM 2 |          | Unadjusted<br>RD 0 - GM2 |          | Age - Sex<br>RD 0 - FM 2 |          | Unadjusted<br>RD 0 - FM2 |          | Age - Sex<br>RD 0 - EL 2 |          | Unadjusted<br>RD 0 - EL2 |          | Age - Sex<br>RD 0 - RL 2 |          | Unadjusted<br>RD 0 - RL2 |          | Age - Sex<br>RD 0 - VR 2 |          | Unadjusted<br>RD 0 - VR2 |          |
|----------|---------------------------|----------|----------------------------|-----------|--------------------------|----------|--------------------------|----------|--------------------------|----------|--------------------------|----------|--------------------------|----------|--------------------------|----------|--------------------------|----------|--------------------------|----------|--------------------------|----------|--------------------------|----------|
|          | Pearson's r               | fdr Pval | Pearson's r                | fdr Pval  | Pearson's r              | fdr Pval | Pearson's r              | fdr Pval | Pearson's r              | fdr Pval | Pearson's r              | fdr Pval | Pearson's r              | fdr Pval | Pearson's r              | fdr Pval | Pearson's r              | fdr Pval | Pearson's r              | fdr Pval | Pearson's r              | fdr Pval | Pearson's r              | fdr Pval |
| ARC_FP_L | 0.07                      | 0.75     | -0.22                      | 0.0025++  | -0.15                    | 0.0493+  | -0.15                    | 0.0444+  | 0.03                     | 0.73     | -0.16                    | 0.0157+  | -0.02                    | 0.94     | -0.16                    | 0.0210+  | 0.05                     | 0.92     | -0.17                    | 0.0245+  | 0.09                     | 0.81     | -0.18                    | 0.07     |
| ARC_FP_R | -0.07                     | 0.75     | -0.18                      | 0.0079++  | 0.10                     | 0.15     | -0.10                    | 0.15     | 0.00                     | 0.98     | -0.09                    | 0.19     | -0.06                    | 0.94     | -0.17                    | 0.0210+  | 0.06                     | 0.92     | -0.15                    | 0.0401+  | -0.07                    | 0.81     | -0.13                    | 0.08     |
| ARC_FT_L | -0.05                     | 0.75     | -0.19                      | 0.0029++  | 0.12                     | 0.07     | -0.11                    | 0.08     | -0.04                    | 0.73     | -0.16                    | 0.0110+  | -0.02                    | 0.94     | -0.15                    | 0.0233+  | -0.05                    | 0.92     | -0.16                    | 0.0245+  | -0.04                    | 0.81     | -0.12                    | 0.08     |
| ARC_FT_R | 0.06                      | 0.75     | -0.20                      | 0.0029++  | 0.12                     | 0.07     | -0.11                    | 0.08     | -0.03                    | 0.73     | -0.15                    | 0.0157+  | -0.01                    | 0.94     | -0.15                    | 0.0250+  | 0.06                     | 0.92     | -0.17                    | 0.0245+  | 0.06                     | 0.81     | -0.14                    | 0.08     |
| ARC_TP_L | 0.05                      | 0.78     | -0.13                      | 0.08      | 0.11                     | 0.15     | -0.14                    | 0.08     | 0.05                     | 0.73     | -0.09                    | 0.25     | 0.05                     | 0.94     | -0.12                    | 0.12     | 0.02                     | 0.92     | -0.11                    | 0.16     | 0.05                     | 0.81     | -0.03                    | 0.71     |
| ARC_TP_R | -0.08                     | 0.75     | -0.22                      | 0.0025++  | -0.09                    | 0.15     | -0.09                    | 0.13     | -0.04                    | 0.73     | -0.17                    | 0.0091++ | -0.04                    | 0.94     | -0.17                    | 0.0210+  | -0.06                    | 0.92     | -0.17                    | 0.0245+  | -0.08                    | 0.81     | -0.15                    | 0.08     |
| CF_M_L   | 0.04                      | 0.78     | -0.17                      | 0.0073++  | -0.14                    | 0.0493+  | -0.14                    | 0.0444+  | 0.02                     | 0.78     | -0.15                    | 0.0165+  | -0.01                    | 0.94     | -0.14                    | 0.0251+  | 0.02                     | 0.92     | -0.14                    | 0.0332+  | 0.03                     | 0.90     | -0.11                    | 0.11     |
| CF_M_R   | -0.07                     | 0.75     | -0.20                      | 0.0029++  | 0.13                     | 0.06     | -0.14                    | 0.0467+  | -0.05                    | 0.73     | -0.18                    | 0.0078++ | -0.02                    | 0.94     | -0.16                    | 0.0210+  | 0.04                     | 0.92     | -0.16                    | 0.0245+  | -0.05                    | 0.81     | -0.13                    | 0.08     |
| Cng_L    | -0.02                     | 0.86     | -0.16                      | 0.0130+   | -0.14                    | 0.05     | -0.14                    | 0.0444+  | -0.05                    | 0.73     | -0.17                    | 0.0091++ | 0.00                     | 0.94     | -0.15                    | 0.0251+  | 0.02                     | 0.92     | -0.11                    | 0.08     | -0.01                    | 0.96     | -0.09                    | 0.15     |
| Cng_R    | -0.02                     | 0.86     | -0.14                      | 0.0286+   | 0.11                     | 0.10     | -0.13                    | 0.06     | -0.03                    | 0.73     | -0.16                    | 0.0157+  | 0.03                     | 0.94     | -0.12                    | 0.07     | 0.03                     | 0.92     | -0.09                    | 0.15     | -0.04                    | 0.81     | -0.11                    | 0.10     |
| CT_M_L   | -0.05                     | 0.75     | -0.19                      | 0.0029++  | -0.15                    | 0.0493+  | -0.15                    | 0.0444+  | 0.04                     | 0.73     | -0.17                    | 0.0078++ | -0.02                    | 0.94     | -0.16                    | 0.0210+  | 0.03                     | 0.92     | -0.15                    | 0.0266+  | 0.04                     | 0.81     | -0.13                    | 0.08     |
| CT_M_R   | -0.06                     | 0.75     | -0.21                      | 0.0025++  | -0.15                    | 0.0493+  | -0.15                    | 0.0444+  | -0.06                    | 0.73     | -0.19                    | 0.0046++ | -0.01                    | 0.94     | -0.16                    | 0.0210+  | -0.03                    | 0.92     | -0.15                    | 0.0262+  | -0.05                    | 0.81     | -0.14                    | 0.08     |
| CT_Par_L | -0.05                     | 0.75     | -0.18                      | 0.0042++  | -0.14                    | 0.0493+  | -0.15                    | 0.0444+  | -0.05                    | 0.73     | -0.17                    | 0.0078++ | -0.02                    | 0.94     | -0.15                    | 0.0214+  | -0.03                    | 0.92     | -0.14                    | 0.0319+  | -0.05                    | 0.81     | -0.13                    | 0.08     |
| CT_Par_R | 0.07                      | 0.75     | -0.20                      | 0.0028++  | -0.17                    | 0.0493+  | -0.17                    | 0.0444+  | -0.07                    | 0.73     | -0.19                    | 0.0046++ | -0.01                    | 0.94     | -0.16                    | 0.0210+  | 0.03                     | 0.92     | -0.15                    | 0.0262+  | 0.07                     | 0.81     | -0.15                    | 0.08     |
| CT_PFC_L | 0.01                      | 0.94     | -0.15                      | 0.0130+   | -0.13                    | 0.06     | -0.13                    | 0.05     | -0.03                    | 0.73     | -0.18                    | 0.0078++ | 0.05                     | 0.94     | -0.12                    | 0.06     | 0.01                     | 0.93     | -0.12                    | 0.05     | 0.01                     | 0.96     | -0.09                    | 0.14     |
| CT_PFC_R | -0.02                     | 0.86     | -0.17                      | 0.0071++  | -0.12                    | 0.07     | -0.13                    | 0.06     | -0.06                    | 0.73     | -0.20                    | 0.0044++ | 0.03                     | 0.94     | -0.13                    | 0.0416+  | 0.00                     | 0.96     | -0.13                    | 0.0443+  | 0.00                     | 0.96     | -0.10                    | 0.13     |
| CT_PM_L  | 0.07                      | 0.75     | -0.21                      | 0.0025++  | 0.12                     | 0.07     | 0.12                     | 0.06     | 0.04                     | 0.73     | -0.17                    | 0.0078++ | 0.03                     | 0.94     | -0.18                    | 0.0210+  | 0.05                     | 0.92     | -0.16                    | 0.0245+  | 0.06                     | 0.81     | -0.14                    | 0.08     |
| CT_PM_R  | -0.05                     | 0.75     | -0.20                      | 0.0029++  | -0.15                    | 0.0493+  | -0.14                    | 0.0444+  | -0.04                    | 0.73     | -0.19                    | 0.0066++ | -0.01                    | 0.94     | -0.17                    | 0.0210+  | -0.02                    | 0.92     | -0.15                    | 0.0262+  | -0.03                    | 0.85     | -0.13                    | 0.08     |
| IFOF_L   | -0.02                     | 0.85     | -0.19                      | 0.0031++  | -0.14                    | 0.0493+  | -0.14                    | 0.0444+  | -0.05                    | 0.73     | -0.20                    | 0.0044++ | 0.01                     | 0.94     | -0.15                    | 0.0210+  | -0.01                    | 0.93     | -0.15                    | 0.0304+  | -0.02                    | 0.90     | -0.12                    | 0.08     |
| IFOF_R   | 0.02                      | 0.85     | -0.19                      | 0.0029++  | -0.14                    | 0.0493+  | -0.14                    | 0.0444+  | 0.05                     | 0.73     | -0.21                    | 0.0040++ | 0.01                     | 0.94     | -0.16                    | 0.0210+  | 0.02                     | 0.92     | -0.16                    | 0.0245+  | 0.02                     | 0.90     | -0.12                    | 0.08     |
| ILF_L    | -0.05                     | 0.75     | -0.20                      | 0.0029++  | 0.13                     | 0.06     | -0.13                    | 0.05     | -0.04                    | 0.73     | -0.18                    | 0.0078++ | -0.01                    | 0.94     | -0.15                    | 0.0210+  | -0.05                    | 0.92     | -0.17                    | 0.0245+  | -0.05                    | 0.81     | -0.14                    | 0.08     |
| ILF_R    | -0.10                     | 0.75     | -0.25                      | 0.0009+++ | -0.14                    | 0.0493+  | -0.14                    | 0.0444+  | -0.06                    | 0.73     | -0.21                    | 0.0040++ | -0.05                    | 0.94     | -0.20                    | 0.0122+  | -0.09                    | 0.92     | -0.22                    | 0.0124+  | -0.10                    | 0.81     | -0.18                    | 0.07     |
| SIF_L    | -0.04                     | 0.78     | -0.17                      | 0.0088++  | -0.14                    | 0.0493+  | -0.14                    | 0.0444+  | -0.02                    | 0.75     | -0.14                    | 0.0285+  | 0.03                     | 0.94     | -0.16                    | 0.0210+  | 0.02                     | 0.92     | -0.13                    | 0.0446+  | -0.02                    | 0.90     | -0.10                    | 0.14     |
| SIF_R    | 0.10                      | 0.75     | -0.21                      | 0.0029++  | -0.16                    | 0.0493+  | -0.16                    | 0.0444+  | -0.10                    | 0.73     | -0.19                    | 0.0078++ | -0.08                    | 0.94     | -0.20                    | 0.0210+  | 0.05                     | 0.92     | -0.15                    | 0.0321+  | 0.08                     | 0.81     | -0.13                    | 0.08     |
| UNC_L    | -0.05                     | 0.75     | -0.22                      | 0.0025++  | -0.15                    | 0.0493+  | -0.14                    | 0.0444+  | -0.07                    | 0.73     | -0.22                    | 0.0040++ | 0.01                     | 0.94     | -0.16                    | 0.0210+  | -0.02                    | 0.92     | -0.17                    | 0.0245+  | -0.04                    | 0.81     | -0.15                    | 0.08     |
| UNC_R    | -0.05                     | 0.75     | -0.23                      | 0.0025++  | -0.15                    | 0.0493+  | -0.14                    | 0.0444+  | -0.07                    | 0.73     | -0.23                    | 0.0040++ | -0.01                    | 0.94     | -0.18                    | 0.0210+  | -0.02                    | 0.92     | -0.17                    | 0.0245+  | -0.04                    | 0.81     | -0.14                    | 0.08     |
| Genu     | -0.03                     | 0.79     | -0.19                      | 0.0030++  | 0.12                     | 0.07     | -0.12                    | 0.06     | 0.08                     | 0.73     | -0.21                    | 0.0040++ | 0.03                     | 0.94     | -0.13                    | 0.0416+  | 0.01                     | 0.94     | -0.14                    | 0.0332+  | -0.02                    | 0.90     | -0.11                    | 0.09     |
| Rost     | 0.00                      | 0.99     | -0.17                      | 0.0066++  | -0.14                    | 0.0493+  | -0.14                    | 0.0444+  | -0.06                    | 0.73     | -0.20                    | 0.0044++ | 0.05                     | 0.94     | -0.12                    | 0.06     | 0.02                     | 0.92     | -0.12                    | 0.05     | 0.01                     | 0.96     | -0.09                    | 0.14     |
| Splen    | -0.09                     | 0.75     | -0.21                      | 0.0025++  | 0.12                     | 0.07     | -0.12                    | 0.06     | -0.05                    | 0.73     | -0.17                    | 0.0078++ | -0.11                    | 0.94     | -0.22                    | 0.0085++ | 0.07                     | 0.92     | -0.17                    | 0.0245+  | -0.05                    | 0.81     | -0.13                    | 0.08     |

Table 6.2.c: Comparison between Age-Sex Corrected and Unadjusted Correlations –FA at birth and MSEL Scores at age 2

Tables display Pearson’s correlations by each tract with FDR-corrected p-values. Age-Sex models are corrected for gestational age at birth and age at MSEL 2-year testing. Cells highlighted in yellow are significant in one model (i.e. unadjusted *or* Age-Sex), cells in yellow are significant in both models, and cells highlighted in gray are of a similar magnitude/trend to those significant in the other model.

| Tract    | Age - Sex    |          | Unadjusted   |          | Age - Sex   |          | Unadjusted  |          | Age - Sex   |          | Unadjusted  |          | Age - Sex   |          | Unadjusted  |          | Age - Sex   |          | Unadjusted  |          |             |          |             |          |             |          |
|----------|--------------|----------|--------------|----------|-------------|----------|-------------|----------|-------------|----------|-------------|----------|-------------|----------|-------------|----------|-------------|----------|-------------|----------|-------------|----------|-------------|----------|-------------|----------|
|          | FA 0 - ELC 2 |          | FA 0 - ELC 2 |          | FA 0 - GM 2 |          | FA 0 - GM2  |          | FA 0 - FM2  |          | FA 0 - FM2  |          | FA 0 - EL 2 |          | FA 0 - EL2  |          | FA 0 - RL 2 |          | FA 0 - RL2  |          | FA 0 - VR 2 |          | FA 0 - VR2  |          |             |          |
|          | Pearson's r  | fdr Pval | Pearson's r  | fdr Pval | Pearson's r | fdr Pval | Pearson's r | fdr Pval | Pearson's r | fdr Pval | Pearson's r | fdr Pval | Pearson's r | fdr Pval | Pearson's r | fdr Pval | Pearson's r | fdr Pval | Pearson's r | fdr Pval | Pearson's r | fdr Pval | Pearson's r | fdr Pval | Pearson's r | fdr Pval |
| ARC_FP_L | 0.05         | 0.75     | 0.19         | 0.0078++ | 0.14        | 0.05     | 0.14        | 0.0497+  | 0.01        | 0.99     | 0.12        | 0.08     | 0.00        | 0.98     | 0.14        | 0.12     | 0.06        | 0.55     | 0.18        | 0.0138+  | 0.06        | 0.64     | 0.14        | 0.06     |             |          |
| ARC_FP_R | 0.07         | 0.75     | 0.13         | 0.07     | 0.11        | 0.15     | 0.10        | 0.16     | 0.03        | 0.99     | 0.09        | 0.29     | 0.05        | 0.98     | 0.11        | 0.14     | 0.07        | 0.55     | 0.12        | 0.10     | 0.07        | 0.60     | 0.10        | 0.22     |             |          |
| ARC_FT_L | -0.04        | 0.78     | 0.07         | 0.25     | 0.13        | 0.06     | 0.13        | 0.06     | -0.03       | 0.99     | 0.07        | 0.32     | -0.08       | 0.98     | 0.03        | 0.09     | -0.01       | 0.95     | 0.08        | 0.21     | 0.00        | 0.99     | 0.06        | 0.41     |             |          |
| ARC_FT_R | 0.05         | 0.75     | 0.14         | 0.0395+  | 0.09        | 0.20     | 0.09        | 0.17     | 0.00        | 0.99     | 0.09        | 0.19     | 0.02        | 0.98     | 0.11        | 0.13     | 0.06        | 0.55     | 0.14        | 0.0397+  | 0.06        | 0.60     | 0.11        | 0.13     |             |          |
| ARC_TP_L | -0.06        | 0.75     | 0.09         | 0.25     | 0.03        | 0.66     | 0.07        | 0.34     | -0.04       | 0.99     | 0.07        | 0.39     | -0.09       | 0.98     | 0.07        | 0.43     | -0.08       | 0.55     | 0.04        | 0.58     | 0.00        | 0.99     | 0.06        | 0.47     |             |          |
| ARC_TP_R | 0.07         | 0.75     | 0.18         | 0.0101+  | 0.13        | 0.06     | 0.14        | 0.0461+  | 0.03        | 0.99     | 0.13        | 0.06     | 0.02        | 0.98     | 0.13        | 0.12     | 0.08        | 0.55     | 0.17        | 0.0138+  | 0.08        | 0.60     | 0.14        | 0.06     |             |          |
| CF_M_L   | 0.01         | 1.00     | 0.11         | 0.09     | 0.15        | 0.0466+  | 0.16        | 0.0350+  | -0.04       | 0.99     | 0.07        | 0.29     | 0.01        | 0.98     | 0.11        | 0.12     | 0.07        | 0.55     | 0.15        | 0.0287+  | 0.02        | 0.92     | 0.09        | 0.22     |             |          |
| CF_M_R   | 0.07         | 0.75     | 0.17         | 0.0131+  | 0.15        | 0.0466+  | 0.16        | 0.0350+  | 0.01        | 0.99     | 0.12        | 0.08     | 0.01        | 0.98     | 0.13        | 0.12     | 0.11        | 0.55     | 0.20        | 0.0070++ | 0.06        | 0.60     | 0.13        | 0.07     |             |          |
| Cing_L   | 0.00         | 1.00     | 0.03         | 0.65     | 0.08        | 0.21     | 0.09        | 0.17     | 0.02        | 0.99     | 0.05        | 0.41     | -0.05       | 0.98     | -0.01       | 0.89     | 0.02        | 0.79     | 0.05        | 0.47     | 0.04        | 0.71     | 0.06        | 0.37     |             |          |
| Cing_R   | -0.11        | 0.64     | -0.06        | 0.36     | 0.06        | 0.36     | 0.07        | 0.27     | -0.10       | 0.99     | -0.05       | 0.48     | -0.10       | 0.98     | -0.04       | 0.60     | -0.05       | 0.60     | 0.00        | 0.97     | -0.05       | 0.64     | -0.02       | 0.75     |             |          |
| CT_M_L   | 0.00         | 1.00     | 0.11         | 0.09     | 0.14        | 0.0466+  | 0.15        | 0.0350+  | -0.04       | 0.99     | 0.08        | 0.28     | -0.01       | 0.98     | 0.11        | 0.13     | 0.05        | 0.60     | 0.14        | 0.0421+  | 0.02        | 0.90     | 0.09        | 0.21     |             |          |
| CT_M_R   | 0.06         | 0.75     | 0.19         | 0.0078++ | 0.20        | 0.0441+  | 0.20        | 0.0350+  | 0.02        | 0.99     | 0.14        | 0.05     | 0.00        | 0.98     | 0.13        | 0.12     | 0.08        | 0.55     | 0.18        | 0.0104+  | 0.09        | 0.60     | 0.16        | 0.0396+  |             |          |
| CT_Par_L | 0.03         | 0.78     | 0.13         | 0.0448+  | 0.14        | 0.06     | 0.15        | 0.0350+  | 0.00        | 0.99     | 0.11        | 0.11     | -0.02       | 0.98     | 0.11        | 0.13     | 0.06        | 0.56     | 0.15        | 0.0263+  | 0.07        | 0.60     | 0.13        | 0.06     |             |          |
| CT_Par_R | 0.05         | 0.75     | 0.16         | 0.0214+  | 0.17        | 0.0466+  | 0.18        | 0.0350+  | 0.04        | 0.99     | 0.15        | 0.05     | -0.03       | 0.98     | 0.10        | 0.14     | 0.07        | 0.55     | 0.17        | 0.0138+  | 0.08        | 0.60     | 0.14        | 0.06     |             |          |
| CT_PFC_L | -0.03        | 0.80     | 0.11         | 0.09     | 0.11        | 0.10     | 0.12        | 0.07     | -0.01       | 0.99     | 0.13        | 0.06     | -0.06       | 0.98     | 0.09        | 0.16     | 0.00        | 0.95     | 0.11        | 0.10     | -0.03       | 0.87     | 0.07        | 0.36     |             |          |
| CT_PFC_R | 0.02         | 0.89     | 0.16         | 0.0185+  | 0.16        | 0.0466+  | 0.16        | 0.0350+  | 0.02        | 0.99     | 0.16        | 0.0294+  | -0.04       | 0.98     | 0.12        | 0.12     | 0.05        | 0.60     | 0.16        | 0.0162+  | 0.02        | 0.90     | 0.11        | 0.12     |             |          |
| CT_PM_L  | 0.03         | 0.78     | 0.13         | 0.0448+  | 0.10        | 0.13     | 0.11        | 0.08     | -0.02       | 0.99     | 0.09        | 0.20     | 0.00        | 0.98     | 0.11        | 0.12     | 0.08        | 0.55     | 0.16        | 0.0184+  | 0.05        | 0.64     | 0.12        | 0.11     |             |          |
| CT_PM_R  | 0.05         | 0.75     | 0.17         | 0.0131+  | 0.17        | 0.0466+  | 0.17        | 0.0350+  | -0.01       | 0.99     | 0.12        | 0.08     | -0.02       | 0.98     | 0.12        | 0.12     | 0.10        | 0.55     | 0.20        | 0.0070++ | 0.07        | 0.60     | 0.15        | 0.0469+  |             |          |
| IFOF_L   | 0.08         | 0.75     | 0.21         | 0.0073++ | 0.15        | 0.0466+  | 0.15        | 0.0350+  | 0.04        | 0.99     | 0.18        | 0.0263+  | -0.01       | 0.98     | 0.14        | 0.12     | 0.09        | 0.55     | 0.19        | 0.0070++ | 0.09        | 0.60     | 0.17        | 0.0396+  |             |          |
| IFOF_R   | 0.05         | 0.75     | 0.19         | 0.0078++ | 0.14        | 0.0466+  | 0.15        | 0.0350+  | 0.04        | 0.99     | 0.19        | 0.0236+  | -0.03       | 0.98     | 0.13        | 0.12     | 0.08        | 0.55     | 0.19        | 0.0082++ | 0.07        | 0.60     | 0.15        | 0.0438+  |             |          |
| ILF_L    | 0.10         | 0.64     | 0.20         | 0.0078++ | 0.12        | 0.08     | 0.13        | 0.05     | 0.07        | 0.99     | 0.17        | 0.0294+  | 0.00        | 0.98     | 0.12        | 0.12     | 0.13        | 0.55     | 0.21        | 0.0070++ | 0.12        | 0.60     | 0.17        | 0.0396+  |             |          |
| ILF_R    | 0.10         | 0.64     | 0.19         | 0.0078++ | 0.09        | 0.18     | 0.10        | 0.12     | 0.08        | 0.99     | 0.19        | 0.0236+  | 0.00        | 0.98     | 0.12        | 0.12     | 0.11        | 0.55     | 0.19        | 0.0070++ | 0.11        | 0.60     | 0.17        | 0.0396+  |             |          |
| SIF_L    | 0.00         | 1.00     | 0.08         | 0.23     | 0.16        | 0.0466+  | 0.17        | 0.0350+  | -0.01       | 0.99     | 0.07        | 0.29     | -0.03       | 0.98     | 0.07        | 0.35     | 0.03        | 0.79     | 0.10        | 0.14     | 0.00        | 0.99     | 0.05        | 0.47     |             |          |
| SIF_R    | 0.11         | 0.64     | 0.15         | 0.0448+  | 0.16        | 0.0466+  | 0.17        | 0.0350+  | 0.11        | 0.99     | 0.15        | 0.06     | -0.09       | 0.98     | 0.14        | 0.12     | 0.05        | 0.60     | 0.10        | 0.17     | 0.10        | 0.60     | 0.11        | 0.15     |             |          |
| UNC_L    | 0.07         | 0.75     | 0.22         | 0.0067++ | 0.16        | 0.0466+  | 0.16        | 0.0350+  | 0.04        | 0.99     | 0.19        | 0.0236+  | -0.01       | 0.98     | 0.15        | 0.12     | 0.08        | 0.55     | 0.19        | 0.0070++ | 0.09        | 0.60     | 0.17        | 0.0396+  |             |          |
| UNC_R    | 0.05         | 0.75     | 0.19         | 0.0078++ | 0.14        | 0.0466+  | 0.15        | 0.0350+  | 0.03        | 0.99     | 0.18        | 0.0263+  | -0.03       | 0.98     | 0.13        | 0.12     | 0.05        | 0.60     | 0.17        | 0.0138+  | 0.08        | 0.60     | 0.16        | 0.0396+  |             |          |
| Genu     | 0.00         | 1.00     | 0.14         | 0.0448+  | 0.12        | 0.08     | 0.12        | 0.07     | 0.05        | 0.99     | 0.16        | 0.0294+  | -0.04       | 0.98     | 0.10        | 0.14     | 0.00        | 0.95     | 0.12        | 0.08     | 0.00        | 0.99     | 0.08        | 0.27     |             |          |
| Rost     | -0.04        | 0.75     | 0.09         | 0.16     | 0.15        | 0.0466+  | 0.15        | 0.0350+  | 0.02        | 0.99     | 0.13        | 0.06     | -0.07       | 0.98     | 0.07        | 0.32     | -0.03       | 0.79     | 0.08        | 0.21     | -0.04       | 0.71     | 0.04        | 0.52     |             |          |
| Splen    | 0.15         | 0.37     | 0.22         | 0.0067++ | 0.09        | 0.16     | 0.11        | 0.10     | 0.07        | 0.99     | 0.15        | 0.0407+  | 0.15        | 0.53     | 0.23        | 0.0046++ | 0.16        | 0.24     | 0.23        | 0.0054++ | 0.10        | 0.60     | 0.16        | 0.0396+  |             |          |



Table 6.3.a: Comparison between Age-Sex Corrected and Unadjusted Correlations –AD at age 1 and MSEL Scores at age 1

Tables display Pearson’s correlations by each tract with FDR-corrected p-values. Age-Sex models are corrected for age at 1-year visit. Cells highlighted in yellow are significant in one model (i.e. unadjusted or Age-Sex), cells in yellow are significant in both models, and cells highlighted in gray are of a similar magnitude/trend to those significant in the other model.

| Tract    | Age - Sex<br>AD 1 - ELC 1 |           | Unadjusted<br>AD 1 - ELC 1 |           | Age - Sex<br>AD 1 - GM 1 |           | Unadjusted<br>AD 1 - GM 1 |           | Age - Sex<br>AD 1 - FM 1 |           | Unadjusted<br>AD 1 - FM 1 |           | Age - Sex<br>AD 1 - EL 1 |           | Unadjusted<br>AD 1 - EL 1 |           | Age - Sex<br>AD 1 - RL 1 |           | Unadjusted<br>AD 1 - RL 1 |           | Age - Sex<br>AD 1 - VR 1 |           | Unadjusted<br>AD 1 - VR 1 |           |
|----------|---------------------------|-----------|----------------------------|-----------|--------------------------|-----------|---------------------------|-----------|--------------------------|-----------|---------------------------|-----------|--------------------------|-----------|---------------------------|-----------|--------------------------|-----------|---------------------------|-----------|--------------------------|-----------|---------------------------|-----------|
|          | Pearson's r               | ltdr Pval | Pearson's r                | ltdr Pval | Pearson's r              | ltdr Pval | Pearson's r               | ltdr Pval | Pearson's r              | ltdr Pval | Pearson's r               | ltdr Pval | Pearson's r              | ltdr Pval | Pearson's r               | ltdr Pval | Pearson's r              | ltdr Pval | Pearson's r               | ltdr Pval | Pearson's r              | ltdr Pval | Pearson's r               | ltdr Pval |
| ARC_FP_L | 0.01                      | 0.91      | 0.01                       | 0.89      | 0.04                     | 0.63      | 0.04                      | 0.58      | 0.01                     | 0.93      | -0.02                     | 0.86      | 0.03                     | 0.61      | -0.04                     | 0.57      | 0.05                     | 0.71      | 0.04                      | 0.60      | 0.00                     | 0.96      | 0.00                      | 0.98      |
| ARC_FP_R | 0.06                      | 0.49      | -0.04                      | 0.65      | -0.03                    | 0.67      | -0.06                     | 0.44      | -0.08                    | 0.38      | -0.10                     | 0.21      | -0.03                    | 0.63      | -0.05                     | 0.47      | -0.09                    | 0.66      | -0.11                     | 0.26      | -0.09                    | 0.59      | -0.12                     | 0.26      |
| ARC_FT_L | 0.17                      | 0.09      | -0.17                      | 0.10      | -0.10                    | 0.24      | -0.12                     | 0.10      | -0.08                    | 0.37      | -0.09                     | 0.32      | -0.17                    | 0.07      | -0.18                     | 0.0216+   | -0.07                    | 0.70      | -0.09                     | 0.42      | -0.13                    | 0.51      | -0.15                     | 0.13      |
| ARC_FT_R | 0.11                      | 0.24      | -0.09                      | 0.41      | 0.03                     | 0.67      | -0.10                     | 0.18      | -0.09                    | 0.37      | -0.14                     | 0.09      | -0.13                    | 0.12      | -0.17                     | 0.0216+   | -0.07                    | 0.70      | -0.12                     | 0.21      | -0.10                    | 0.59      | -0.15                     | 0.13      |
| ARC_TP_L | 0.05                      | 0.49      | -0.05                      | 0.64      | 0.04                     | 0.63      | -0.06                     | 0.44      | -0.05                    | 0.73      | -0.06                     | 0.49      | -0.12                    | 0.12      | -0.13                     | 0.07      | 0.03                     | 0.87      | 0.01                      | 0.84      | -0.08                    | 0.66      | -0.09                     | 0.30      |
| ARC_TP_R | 0.00                      | 0.95      | 0.02                       | 0.89      | 0.06                     | 0.48      | 0.01                      | 0.90      | 0.01                     | 0.93      | -0.04                     | 0.70      | -0.09                    | 0.21      | -0.12                     | 0.09      | -0.01                    | 0.96      | -0.05                     | 0.54      | -0.02                    | 0.90      | -0.06                     | 0.50      |
| CF_M_L   | 0.08                      | 0.36      | -0.07                      | 0.44      | 0.11                     | 0.22      | -0.13                     | 0.07      | 0.13                     | 0.17      | -0.15                     | 0.07      | -0.17                    | 0.07      | -0.19                     | 0.0216+   | -0.02                    | 0.96      | -0.04                     | 0.59      | 0.00                     | 0.96      | -0.03                     | 0.78      |
| CF_M_R   | 0.08                      | 0.36      | -0.07                      | 0.44      | -0.13                    | 0.10      | -0.16                     | 0.0249+   | 0.13                     | 0.17      | -0.14                     | 0.07      | -0.12                    | 0.12      | -0.14                     | 0.0457+   | -0.05                    | 0.71      | -0.08                     | 0.43      | 0.03                     | 0.79      | 0.07                      | 0.46      |
| Cing_L   | -0.07                     | 0.40      | -0.08                      | 0.44      | -0.04                    | 0.63      | -0.05                     | 0.51      | -0.08                    | 0.37      | -0.08                     | 0.36      | -0.11                    | 0.16      | -0.11                     | 0.11      | -0.05                    | 0.71      | -0.06                     | 0.53      | -0.06                    | 0.76      | -0.07                     | 0.46      |
| Cing_R   | 0.07                      | 0.40      | -0.07                      | 0.44      | 0.06                     | 0.48      | -0.08                     | 0.26      | 0.04                     | 0.75      | -0.05                     | 0.58      | 0.10                     | 0.18      | -0.11                     | 0.11      | -0.02                    | 0.96      | -0.04                     | 0.60      | -0.08                    | 0.66      | -0.10                     | 0.26      |
| CT_M_L   | 0.03                      | 0.68      | -0.01                      | 0.89      | -0.18                    | 0.0220+   | -0.22                     | 0.0027++  | 0.10                     | 0.28      | -0.14                     | 0.08      | -0.14                    | 0.10      | -0.17                     | 0.0216+   | -0.03                    | 0.86      | -0.07                     | 0.45      | 0.04                     | 0.76      | -0.01                     | 0.96      |
| CT_M_R   | -0.15                     | 0.18      | -0.13                      | 0.40      | -0.20                    | 0.0151+   | -0.24                     | 0.0012++  | -0.15                    | 0.14      | -0.17                     | 0.0268+   | -0.15                    | 0.09      | -0.18                     | 0.0216+   | -0.13                    | 0.59      | -0.17                     | 0.10      | -0.06                    | 0.76      | -0.10                     | 0.26      |
| CT_Par_L | 0.10                      | 0.25      | -0.09                      | 0.41      | -0.20                    | 0.0151+   | -0.22                     | 0.0027++  | -0.08                    | 0.37      | -0.11                     | 0.19      | -0.19                    | 0.05      | -0.21                     | 0.0190+   | -0.12                    | 0.59      | -0.14                     | 0.10      | -0.04                    | 0.76      | -0.07                     | 0.44      |
| CT_Par_R | 0.12                      | 0.24      | -0.09                      | 0.41      | -0.14                    | 0.08      | -0.19                     | 0.0077++  | -0.20                    | 0.0314+   | -0.23                     | 0.0051++  | -0.15                    | 0.10      | -0.18                     | 0.0216+   | -0.10                    | 0.62      | -0.14                     | 0.10      | 0.05                     | 0.76      | 0.11                      | 0.26      |
| CT_PFC_L | -0.09                     | 0.30      | -0.08                      | 0.44      | -0.15                    | 0.07      | -0.17                     | 0.0226+   | -0.16                    | 0.11      | -0.18                     | 0.0268+   | -0.08                    | 0.27      | -0.10                     | 0.17      | 0.01                     | 0.97      | -0.02                     | 0.80      | -0.06                    | 0.76      | -0.09                     | 0.33      |
| CT_PFC_R | 0.13                      | 0.23      | -0.11                      | 0.41      | -0.18                    | 0.0231+   | -0.21                     | 0.0040++  | -0.11                    | 0.23      | -0.15                     | 0.07      | -0.15                    | 0.09      | -0.18                     | 0.0216+   | -0.01                    | 0.97      | -0.04                     | 0.59      | -0.04                    | 0.79      | -0.08                     | 0.44      |
| CT_PM_L  | 0.01                      | 0.93      | 0.01                       | 0.89      | 0.09                     | 0.28      | 0.14                      | 0.06      | 0.03                     | 0.77      | -0.07                     | 0.45      | 0.08                     | 0.26      | 0.11                      | 0.11      | 0.00                     | 0.97      | -0.04                     | 0.59      | 0.05                     | 0.76      | 0.01                      | 0.96      |
| CT_PM_R  | -0.12                     | 0.23      | -0.09                      | 0.41      | -0.20                    | 0.0151+   | -0.25                     | 0.0007+++ | -0.13                    | 0.17      | -0.17                     | 0.0268+   | -0.13                    | 0.12      | -0.17                     | 0.0216+   | -0.10                    | 0.61      | -0.15                     | 0.10      | -0.05                    | 0.76      | -0.10                     | 0.26      |
| IFOF_L   | -0.06                     | 0.46      | -0.06                      | 0.49      | -0.09                    | 0.30      | -0.10                     | 0.18      | -0.01                    | 0.93      | -0.01                     | 0.86      | -0.04                    | 0.58      | -0.05                     | 0.47      | -0.05                    | 0.71      | -0.06                     | 0.47      | -0.02                    | 0.88      | -0.04                     | 0.69      |
| IFOF_R   | 0.11                      | 0.24      | 0.12                       | 0.41      | 0.05                     | 0.63      | -0.04                     | 0.58      | 0.04                     | 0.75      | -0.02                     | 0.79      | 0.08                     | 0.26      | -0.08                     | 0.28      | -0.08                    | 0.66      | -0.07                     | 0.45      | 0.05                     | 0.76      | 0.04                      | 0.68      |
| ILF_L    | -0.07                     | 0.40      | -0.07                      | 0.44      | -0.14                    | 0.08      | -0.16                     | 0.0325+   | -0.04                    | 0.77      | -0.04                     | 0.68      | -0.08                    | 0.27      | -0.09                     | 0.20      | -0.05                    | 0.71      | -0.07                     | 0.47      | -0.01                    | 0.96      | -0.02                     | 0.82      |
| ILF_R    | -0.07                     | 0.40      | -0.08                      | 0.44      | -0.11                    | 0.19      | -0.12                     | 0.10      | -0.07                    | 0.47      | -0.06                     | 0.49      | -0.11                    | 0.16      | -0.11                     | 0.12      | -0.07                    | 0.70      | -0.08                     | 0.42      | 0.03                     | 0.82      | 0.01                      | 0.95      |
| SLF_L    | 0.13                      | 0.23      | -0.11                      | 0.41      | 0.07                     | 0.45      | -0.10                     | 0.18      | 0.10                     | 0.28      | -0.13                     | 0.11      | 0.11                     | 0.15      | -0.13                     | 0.07      | 0.08                     | 0.66      | -0.11                     | 0.26      | -0.10                    | 0.59      | -0.12                     | 0.26      |
| SLF_R    | -0.22                     | 0.0168+   | -0.19                      | 0.07      | 0.09                     | 0.28      | -0.13                     | 0.08      | -0.16                    | 0.11      | -0.19                     | 0.0235+   | -0.14                    | 0.10      | -0.16                     | 0.0232+   | -0.11                    | 0.59      | -0.14                     | 0.10      | -0.16                    | 0.34      | -0.19                     | 0.0334+   |
| UNC_L    | -0.04                     | 0.63      | -0.04                      | 0.69      | -0.03                    | 0.68      | -0.03                     | 0.61      | -0.03                    | 0.79      | -0.03                     | 0.74      | -0.04                    | 0.55      | -0.05                     | 0.47      | -0.01                    | 0.96      | -0.02                     | 0.82      | -0.04                    | 0.79      | -0.04                     | 0.69      |
| UNC_R    | 0.02                      | 0.78      | -0.02                      | 0.83      | 0.03                     | 0.69      | 0.04                      | 0.59      | 0.00                     | 0.96      | 0.00                      | 0.98      | 0.04                     | 0.58      | -0.03                     | 0.63      | 0.06                     | 0.71      | 0.07                      | 0.46      | 0.06                     | 0.76      | 0.05                      | 0.68      |
| Genu     | -0.07                     | 0.40      | -0.03                      | 0.79      | -0.20                    | 0.0189+   | -0.27                     | 0.0007+++ | -0.03                    | 0.77      | -0.11                     | 0.18      | -0.12                    | 0.14      | -0.18                     | 0.0216+   | -0.07                    | 0.70      | -0.15                     | 0.10      | -0.02                    | 0.90      | -0.11                     | 0.26      |
| Rost     | -0.11                     | 0.24      | -0.07                      | 0.44      | -0.09                    | 0.30      | -0.17                     | 0.0249+   | -0.14                    | 0.17      | -0.20                     | 0.0215+   | -0.10                    | 0.16      | -0.16                     | 0.0271+   | -0.01                    | 0.96      | -0.09                     | 0.40      | -0.12                    | 0.55      | -0.19                     | 0.0334+   |
| Spken    | 0.12                      | 0.23      | -0.10                      | 0.41      | -0.04                    | 0.63      | -0.10                     | 0.18      | -0.03                    | 0.77      | -0.06                     | 0.49      | -0.14                    | 0.10      | -0.17                     | 0.0216+   | -0.12                    | 0.59      | -0.16                     | 0.10      | -0.09                    | 0.59      | -0.14                     | 0.16      |

Table 6.3.b: Comparison between Age-Sex Corrected and Unadjusted Correlations –RD at age 1 and MSEL Scores at age 1

Tables display Pearson’s correlations by each tract with FDR-corrected p-values. Age-Sex models are corrected for age at 1-year visit. Cells highlighted in yellow are significant in one model (i.e. unadjusted or Age-Sex), cells in yellow are significant in both models, and cells highlighted in gray are of a similar magnitude/trend to those significant in the other model.

| Tract    | Age - Sex    |          | Unadjusted   |          | Age - Sex    |          | Unadjusted   |           | Age - Sex   |          | Unadjusted  |           | Age - Sex   |          | Unadjusted  |           | Age - Sex   |          | Unadjusted  |          | Age - Sex   |          | Unadjusted  |          |
|----------|--------------|----------|--------------|----------|--------------|----------|--------------|-----------|-------------|----------|-------------|-----------|-------------|----------|-------------|-----------|-------------|----------|-------------|----------|-------------|----------|-------------|----------|
|          | RD 1 - ELC 1 |          | RD 1 - ELC 1 |          | RD 1 - GAM 1 |          | RD 1 - GAM 1 |           | RD 1 - FM 1 |          | RD 1 - FM 1 |           | RD 1 - EL 1 |          | RD 1 - EL 1 |           | RD 1 - RL 1 |          | RD 1 - RL 1 |          | RD 1 - VR 1 |          | RD 1 - VR 1 |          |
|          | Pearson's r  | Idr Pval  | Pearson's r | Idr Pval | Pearson's r | Idr Pval  | Pearson's r | Idr Pval | Pearson's r | Idr Pval  | Pearson's r | Idr Pval | Pearson's r | Idr Pval | Pearson's r | Idr Pval | Pearson's r | Idr Pval |
| ARC_FP_L | 0.11         | 0.13     | 0.07         | 0.31     | -0.12        | 0.06     | -0.19        | 0.0035++  | -0.12       | 0.06     | -0.18       | 0.0058++  | -0.14       | 0.06     | -0.18       | 0.0109+   | -0.06       | 0.61     | -0.12       | 0.12     | -0.08       | 0.41     | -0.15       | 0.06     |
| ARC_FP_R | 0.14         | 0.07     | -0.11        | 0.22     | -0.11        | 0.10     | -0.17        | 0.0064++  | -0.15       | 0.0248+  | -0.20       | 0.0023++  | -0.13       | 0.07     | -0.17       | 0.0134+   | -0.05       | 0.62     | -0.11       | 0.13     | -0.10       | 0.40     | -0.16       | 0.0462+  |
| ARC_FT_L | 0.10         | 0.13     | 0.09         | 0.26     | -0.15        | 0.0299+  | -0.19        | 0.0041++  | -0.13       | 0.0432+  | -0.17       | 0.0098++  | -0.14       | 0.06     | -0.17       | 0.0139+   | -0.03       | 0.70     | -0.07       | 0.30     | -0.07       | 0.55     | -0.11       | 0.14     |
| ARC_FT_R | -0.16        | 0.0484+  | -0.11        | 0.22     | 0.09         | 0.16     | -0.17        | 0.0075++  | -0.14       | 0.0350+  | -0.22       | 0.0014++  | -0.14       | 0.06     | -0.19       | 0.0093++  | -0.06       | 0.61     | -0.13       | 0.12     | -0.15       | 0.34     | -0.22       | 0.0144+  |
| ARC_IP_L | -0.16        | 0.0459+  | -0.13        | 0.15     | -0.14        | 0.0352+  | -0.20        | 0.0019++  | -0.17       | 0.0153+  | -0.22       | 0.0013++  | -0.20       | 0.0108+  | -0.24       | 0.0011++  | -0.06       | 0.61     | -0.12       | 0.12     | -0.15       | 0.34     | -0.21       | 0.0144+  |
| ARC_IP_R | 0.13         | 0.10     | 0.09         | 0.23     | 0.08         | 0.19     | -0.15        | 0.0203+   | -0.14       | 0.0350+  | -0.19       | 0.0033++  | -0.14       | 0.06     | -0.18       | 0.0117+   | -0.05       | 0.62     | -0.11       | 0.13     | -0.12       | 0.37     | -0.18       | 0.0297+  |
| CF_M_L   | -0.20        | 0.0196+  | -0.18        | 0.06     | -0.21        | 0.0037++ | -0.23        | 0.0005+++ | -0.20       | 0.0070++ | -0.22       | 0.0012++  | -0.20       | 0.0108+  | -0.21       | 0.0033++  | -0.16       | 0.20     | -0.18       | 0.0394+  | -0.10       | 0.39     | -0.13       | 0.09     |
| CF_M_R   | -0.12        | 0.11     | -0.10        | 0.23     | -0.22        | 0.0037++ | -0.23        | 0.0005+++ | -0.18       | 0.0111+  | -0.20       | 0.0023++  | -0.15       | 0.0460+  | -0.17       | 0.0134+   | -0.12       | 0.28     | -0.15       | 0.09     | -0.02       | 0.85     | -0.05       | 0.53     |
| Cng_L    | 0.08         | 0.23     | 0.06         | 0.44     | -0.18        | 0.0102+  | -0.21        | 0.0014++  | -0.11       | 0.09     | -0.15       | 0.0193+   | -0.10       | 0.12     | -0.13       | 0.0496+   | -0.03       | 0.70     | -0.07       | 0.33     | 0.05        | 0.56     | 0.09        | 0.19     |
| Cng_R    | 0.12         | 0.11     | -0.09        | 0.26     | -0.17        | 0.0147+  | -0.21        | 0.0014++  | -0.11       | 0.08     | -0.16       | 0.0119+   | -0.13       | 0.06     | -0.17       | 0.0139+   | -0.05       | 0.62     | -0.09       | 0.20     | -0.08       | 0.43     | -0.12       | 0.10     |
| CT_M_L   | -0.18        | 0.0340+  | -0.16        | 0.11     | -0.23        | 0.0037++ | -0.26        | 0.0004+++ | -0.16       | 0.0183+  | -0.19       | 0.0033++  | -0.16       | 0.0419+  | -0.19       | 0.0093++  | -0.16       | 0.20     | -0.19       | 0.0340+  | -0.10       | 0.39     | -0.14       | 0.06     |
| CT_M_R   | 0.10         | 0.13     | 0.10         | 0.23     | -0.24        | 0.0028++ | -0.25        | 0.0004+++ | -0.13       | 0.0432+  | -0.14       | 0.0233+   | 0.08        | 0.21     | -0.10       | 0.13      | -0.11       | 0.36     | -0.13       | 0.12     | 0.01        | 0.85     | 0.04        | 0.58     |
| CT_Par_L | -0.18        | 0.0340+  | -0.15        | 0.13     | -0.21        | 0.0037++ | -0.25        | 0.0004+++ | -0.18       | 0.0111+  | -0.22       | 0.0013++  | -0.24       | 0.0028++ | -0.27       | 0.0004+++ | -0.13       | 0.27     | -0.17       | 0.0464+  | -0.06       | 0.56     | -0.11       | 0.14     |
| CT_Par_R | 0.10         | 0.14     | -0.08        | 0.27     | -0.14        | 0.0385+  | -0.17        | 0.0064++  | -0.20       | 0.0070++ | -0.22       | 0.0012++  | -0.17       | 0.0410+  | -0.19       | 0.0093++  | -0.10       | 0.46     | -0.13       | 0.12     | -0.01       | 0.85     | -0.06       | 0.45     |
| CT_PFC_L | 0.04         | 0.51     | 0.03         | 0.67     | -0.20        | 0.0060++ | -0.21        | 0.0014++  | -0.18       | 0.0111+  | -0.20       | 0.0027++  | 0.07        | 0.28     | -0.08       | 0.19      | 0.02        | 0.82     | -0.01       | 0.93     | 0.01        | 0.85     | 0.04        | 0.58     |
| CT_PFC_R | 0.14         | 0.09     | -0.11        | 0.22     | -0.18        | 0.0113+  | -0.22        | 0.0012++  | -0.21       | 0.0070++ | -0.25       | 0.0007+++ | -0.14       | 0.06     | -0.17       | 0.0139+   | -0.05       | 0.62     | -0.09       | 0.21     | -0.06       | 0.56     | -0.11       | 0.15     |
| CT_PM_L  | -0.15        | 0.0484+  | -0.13        | 0.15     | -0.16        | 0.0147+  | -0.20        | 0.0026++  | -0.17       | 0.0132+  | -0.19       | 0.0028++  | -0.11       | 0.10     | -0.14       | 0.0377+   | -0.09       | 0.46     | -0.12       | 0.12     | -0.06       | 0.56     | -0.09       | 0.19     |
| CT_PM_R  | 0.11         | 0.13     | 0.10         | 0.23     | -0.22        | 0.0037++ | -0.24        | 0.0005+++ | -0.16       | 0.0183+  | -0.18       | 0.0058++  | 0.10        | 0.14     | -0.12       | 0.07      | -0.08       | 0.52     | -0.10       | 0.14     | 0.02        | 0.85     | 0.05        | 0.53     |
| IFOF_L   | 0.13         | 0.09     | -0.11        | 0.22     | -0.19        | 0.0090++ | -0.23        | 0.0005+++ | -0.20       | 0.0070++ | -0.22       | 0.0012++  | -0.13       | 0.07     | -0.16       | 0.0139+   | -0.06       | 0.61     | -0.11       | 0.13     | -0.08       | 0.41     | -0.14       | 0.07     |
| IFOF_R   | 0.13         | 0.10     | -0.10        | 0.23     | -0.21        | 0.0037++ | -0.26        | 0.0004+++ | -0.22       | 0.0069++ | -0.25       | 0.0005+++ | -0.16       | 0.0419+  | -0.20       | 0.0079++  | -0.06       | 0.61     | -0.12       | 0.12     | -0.09       | 0.41     | -0.15       | 0.06     |
| ILF_L    | 0.16         | 0.0459+  | 0.14         | 0.15     | -0.21        | 0.0042++ | -0.26        | 0.0004+++ | -0.20       | 0.0070++ | -0.24       | 0.0008+++ | -0.14       | 0.06     | -0.18       | 0.0109+   | -0.10       | 0.46     | -0.15       | 0.09     | -0.12       | 0.37     | -0.18       | 0.0297+  |
| ILF_R    | -0.16        | 0.0459+  | -0.13        | 0.15     | -0.18        | 0.0113+  | -0.24        | 0.0005+++ | -0.22       | 0.0069++ | -0.26       | 0.0005+++ | -0.21       | 0.0108+  | -0.25       | 0.0011++  | -0.09       | 0.46     | -0.16       | 0.08     | -0.10       | 0.39     | -0.17       | 0.0322+  |
| SLF_L    | 0.11         | 0.12     | -0.08        | 0.28     | -0.11        | 0.09     | -0.17        | 0.0064++  | -0.15       | 0.0227+  | -0.21       | 0.0021++  | -0.13       | 0.07     | -0.17       | 0.0139+   | -0.07       | 0.61     | -0.12       | 0.12     | -0.08       | 0.41     | -0.14       | 0.06     |
| SLF_R    | 0.12         | 0.11     | 0.09         | 0.23     | 0.09         | 0.16     | -0.13        | 0.0397+   | -0.15       | 0.0224+  | -0.19       | 0.0040++  | -0.11       | 0.12     | -0.13       | 0.0449+   | -0.03       | 0.70     | -0.07       | 0.33     | 0.08        | 0.43     | -0.11       | 0.13     |
| UNC_L    | -0.04        | 0.56     | -0.03        | 0.67     | -0.15        | 0.0228+  | -0.16        | 0.0108+   | -0.13       | 0.0432+  | -0.14       | 0.0301+   | -0.07       | 0.28     | -0.08       | 0.21      | 0.00        | 0.94     | -0.02       | 0.76     | -0.02       | 0.85     | -0.03       | 0.58     |
| UNC_R    | 0.07         | 0.29     | -0.06        | 0.44     | -0.16        | 0.0177+  | -0.19        | 0.0036++  | -0.18       | 0.0111+  | -0.20       | 0.0023++  | -0.08       | 0.26     | -0.10       | 0.13      | -0.04       | 0.63     | -0.07       | 0.29     | -0.04       | 0.69     | -0.08       | 0.28     |
| Genu     | 0.07         | 0.32     | 0.03         | 0.67     | -0.17        | 0.0147+  | -0.23        | 0.0009+++ | -0.18       | 0.0132+  | -0.24       | 0.0008+++ | -0.13       | 0.08     | -0.17       | 0.0146+   | -0.06       | 0.61     | -0.12       | 0.12     | 0.01        | 0.85     | -0.06       | 0.45     |
| Rost     | 0.06         | 0.38     | -0.02        | 0.72     | -0.16        | 0.0147+  | -0.23        | 0.0005+++ | -0.19       | 0.0070++ | -0.25       | 0.0005+++ | 0.07        | 0.27     | -0.12       | 0.06      | 0.01        | 0.92     | -0.06       | 0.33     | -0.04       | 0.74     | -0.11       | 0.13     |
| Splen    | -0.22        | 0.0109+  | -0.19        | 0.06     | -0.18        | 0.0113+  | -0.23        | 0.0005+++ | -0.19       | 0.0090++ | -0.23       | 0.0008+++ | -0.20       | 0.0108+  | -0.24       | 0.0011++  | -0.14       | 0.23     | -0.19       | 0.0340+  | -0.12       | 0.37     | -0.18       | 0.0297+  |



Table 6.3.c: Comparison between Age-Sex Corrected and Unadjusted Correlations –FA at age 1 and MSEL Scores at age 1

Tables display Pearson’s correlations by each tract with FDR-corrected p-values. Age-Sex models are corrected for age at 1-year visit. Cells highlighted in yellow are significant in one model (i.e. unadjusted or Age-Sex), cells in yellow are significant in both models, and cells highlighted in gray are of a similar magnitude/trend to those significant in the other model.

| Tract    | Age - Sex    |              | Unadjusted   |              | Age - Sex    |              | Unadjusted  |             | Age - Sex   |             | Unadjusted  |             | Age - Sex   |             | Unadjusted  |             | Age - Sex   |             | Unadjusted  |             |       |      |       |         |
|----------|--------------|--------------|--------------|--------------|--------------|--------------|-------------|-------------|-------------|-------------|-------------|-------------|-------------|-------------|-------------|-------------|-------------|-------------|-------------|-------------|-------|------|-------|---------|
|          | FA 1 - ELC 1 | FA 1 - ELC 1 | FA 1 - GMI 1 | FA 1 - GMI 1 | FA 1 - FMI 1 | FA 1 - FMI 1 | FA 1 - EL 1 | FA 1 - EL 1 | FA 1 - RL 1 | FA 1 - RL 1 | FA 1 - VR 1 |       |      |       |         |
|          | Pearson's r  | Idr Pval     | Pearson's r  | Idr Pval     | Pearson's r  | Idr Pval     | Pearson's r | Idr Pval    | Pearson's r | Idr Pval    | Pearson's r | Idr Pval    | Pearson's r | Idr Pval    | Pearson's r | Idr Pval    | Pearson's r | Idr Pval    | Pearson's r | Idr Pval    |       |      |       |         |
| ARC_FP_L | 0.08         | 0.46         | 0.04         | 0.87         | 0.10         | 0.13         | 0.18        | 0.0115+     | 0.13        | 0.08        | 0.19        | 0.0053++    | 0.10        | 0.24        | 0.15        | 0.07        | 0.06        | 0.83        | 0.13        | 0.16        | 0.08  | 0.53 | 0.16  | 0.05    |
| ARC_FP_R | 0.07         | 0.57         | 0.05         | 0.87         | 0.11         | 0.10         | 0.16        | 0.0187+     | 0.09        | 0.18        | 0.13        | 0.06        | 0.11        | 0.24        | 0.14        | 0.09        | -0.04       | 0.83        | 0.01        | 0.93        | 0.00  | 0.99 | 0.05  | 0.66    |
| ARC_FT_L | 0.02         | 0.87         | 0.00         | 0.95         | 0.11         | 0.11         | 0.14        | 0.0333+     | 0.10        | 0.17        | 0.13        | 0.05        | 0.03        | 0.74        | 0.06        | 0.49        | -0.01       | 0.98        | 0.03        | 0.88        | 0.02  | 0.94 | 0.06  | 0.66    |
| ARC_FT_R | 0.12         | 0.20         | 0.07         | 0.74         | 0.13         | 0.07         | 0.19        | 0.0112+     | 0.12        | 0.10        | 0.19        | 0.0055++    | 0.08        | 0.36        | 0.13        | 0.11        | 0.04        | 0.83        | 0.10        | 0.28        | 0.11  | 0.39 | 0.17  | 0.05    |
| ARC_IP_L | 0.17         | 0.0437+      | 0.13         | 0.17         | 0.15         | 0.0430+      | 0.22        | 0.0031++    | 0.17        | 0.0175+     | 0.22        | 0.0015++    | 0.14        | 0.24        | 0.18        | 0.0333+     | 0.10        | 0.50        | 0.16        | 0.07        | 0.12  | 0.31 | 0.19  | 0.0272+ |
| ARC_IP_R | 0.13         | 0.12         | 0.11         | 0.33         | 0.17         | 0.0347+      | 0.22        | 0.0031++    | 0.18        | 0.0121+     | 0.22        | 0.0017++    | 0.08        | 0.36        | 0.11        | 0.13        | 0.06        | 0.83        | 0.10        | 0.27        | 0.13  | 0.31 | 0.17  | 0.05    |
| CF_M_L   | 0.17         | 0.0393+      | 0.16         | 0.08         | 0.17         | 0.0347+      | 0.18        | 0.0112+     | 0.14        | 0.06        | 0.15        | 0.0231+     | 0.12        | 0.24        | 0.13        | 0.11        | 0.15        | 0.26        | 0.16        | 0.07        | 0.11  | 0.35 | 0.13  | 0.14    |
| CF_M_R   | 0.10         | 0.31         | 0.08         | 0.61         | 0.17         | 0.0347+      | 0.18        | 0.0112+     | 0.12        | 0.09        | 0.15        | 0.0317+     | 0.11        | 0.24        | 0.12        | 0.11        | 0.11        | 0.50        | 0.12        | 0.17        | 0.01  | 0.94 | 0.03  | 0.88    |
| Cng_L    | 0.01         | 0.93         | 0.02         | 0.93         | 0.14         | 0.05         | 0.16        | 0.0187+     | 0.04        | 0.52        | 0.09        | 0.19        | 0.01        | 0.93        | 0.03        | 0.68        | -0.04       | 0.83        | -0.01       | 0.96        | -0.01 | 0.94 | 0.02  | 0.91    |
| Cng_R    | 0.05         | 0.71         | 0.03         | 0.91         | 0.10         | 0.13         | 0.12        | 0.07        | 0.07        | 0.31        | 0.10        | 0.12        | 0.04        | 0.68        | 0.06        | 0.50        | 0.03        | 0.89        | 0.04        | 0.70        | 0.00  | 1.00 | 0.02  | 0.91    |
| CT_M_L   | 0.20         | 0.0172+      | 0.19         | 0.0401+      | 0.14         | 0.0461+      | 0.16        | 0.0187+     | 0.11        | 0.12        | 0.12        | 0.07        | 0.10        | 0.25        | 0.11        | 0.13        | 0.15        | 0.26        | 0.16        | 0.07        | 0.15  | 0.31 | 0.16  | 0.05    |
| CT_M_R   | 0.02         | 0.88         | 0.02         | 0.94         | 0.16         | 0.0420+      | 0.15        | 0.0238+     | 0.04        | 0.52        | 0.04        | 0.51        | 0.02        | 0.90        | 0.02        | 0.80        | 0.00        | 0.98        | 0.00        | 0.96        | -0.03 | 0.94 | -0.03 | 0.90    |
| CT_Par_L | 0.16         | 0.0437+      | 0.13         | 0.17         | 0.12         | 0.08         | 0.16        | 0.0187+     | 0.18        | 0.0121+     | 0.22        | 0.0014++    | 0.12        | 0.24        | 0.15        | 0.07        | 0.07        | 0.83        | 0.11        | 0.23        | 0.08  | 0.56 | 0.12  | 0.15    |
| CT_Par_R | 0.04         | 0.77         | 0.03         | 0.91         | 0.09         | 0.16         | 0.11        | 0.10        | 0.09        | 0.19        | 0.10        | 0.12        | 0.09        | 0.34        | 0.10        | 0.22        | 0.05        | 0.83        | 0.07        | 0.46        | -0.02 | 0.94 | 0.00  | 0.98    |
| CT_PFC_L | 0.04         | 0.77         | 0.05         | 0.87         | 0.15         | 0.0430+      | 0.16        | 0.0187+     | 0.10        | 0.17        | 0.12        | 0.08        | 0.02        | 0.85        | 0.03        | 0.64        | -0.04       | 0.83        | -0.02       | 0.92        | -0.06 | 0.77 | 0.04  | 0.77    |
| CT_PFC_R | 0.03         | 0.77         | 0.01         | 0.95         | 0.07         | 0.31         | 0.10        | 0.11        | 0.16        | 0.0287+     | 0.19        | 0.0053++    | 0.01        | 0.90        | 0.04        | 0.59        | 0.04        | 0.83        | 0.07        | 0.46        | 0.02  | 0.94 | 0.06  | 0.66    |
| CT_PM_L  | 0.18         | 0.0386+      | 0.17         | 0.07         | 0.15         | 0.0430+      | 0.16        | 0.0187+     | 0.18        | 0.0131+     | 0.19        | 0.0053++    | 0.10        | 0.24        | 0.11        | 0.13        | 0.11        | 0.50        | 0.12        | 0.16        | 0.09  | 0.47 | 0.11  | 0.21    |
| CT_PM_R  | 0.04         | 0.76         | 0.04         | 0.87         | 0.13         | 0.07         | 0.12        | 0.06        | 0.09        | 0.20        | 0.08        | 0.20        | 0.04        | 0.68        | 0.04        | 0.59        | 0.00        | 0.98        | 0.00        | 0.96        | -0.02 | 0.94 | -0.02 | 0.91    |
| IFOF_L   | 0.08         | 0.46         | 0.06         | 0.84         | 0.13         | 0.07         | 0.18        | 0.0112+     | 0.21        | 0.0057++    | 0.24        | 0.0008+++   | 0.09        | 0.28        | 0.13        | 0.11        | 0.02        | 0.94        | 0.07        | 0.46        | 0.05  | 0.83 | 0.10  | 0.21    |
| IFOF_R   | 0.08         | 0.47         | 0.05         | 0.87         | 0.20         | 0.0281+      | 0.26        | 0.0008+++   | 0.22        | 0.0025++    | 0.27        | 0.0001+++   | 0.12        | 0.24        | 0.17        | 0.05        | 0.03        | 0.83        | 0.10        | 0.27        | 0.05  | 0.83 | 0.12  | 0.15    |
| ILF_L    | 0.13         | 0.12         | 0.10         | 0.34         | 0.15         | 0.0430+      | 0.21        | 0.0037++    | 0.23        | 0.0025++    | 0.27        | 0.0001+++   | 0.11        | 0.24        | 0.15        | 0.08        | 0.08        | 0.71        | 0.14        | 0.16        | 0.14  | 0.31 | 0.20  | 0.0272+ |
| ILF_R    | 0.15         | 0.09         | 0.11         | 0.33         | 0.16         | 0.0386+      | 0.23        | 0.0017++    | 0.24        | 0.0020++    | 0.29        | <.0001+++   | 0.20        | 0.06        | 0.24        | 0.0036++    | 0.07        | 0.83        | 0.13        | 0.16        | 0.13  | 0.31 | 0.20  | 0.0272+ |
| SLF_L    | 0.03         | 0.83         | 0.00         | 0.95         | 0.08         | 0.24         | 0.14        | 0.0375+     | 0.12        | 0.10        | 0.17        | 0.0102+     | 0.05        | 0.68        | 0.09        | 0.23        | 0.00        | 0.98        | 0.05        | 0.60        | 0.03  | 0.94 | 0.09  | 0.28    |
| SLF_R    | 0.02         | 0.88         | 0.03         | 0.91         | 0.04         | 0.50         | 0.07        | 0.30        | 0.06        | 0.35        | 0.08        | 0.20        | 0.03        | 0.79        | 0.04        | 0.59        | -0.04       | 0.83        | -0.02       | 0.93        | -0.03 | 0.94 | 0.00  | 0.99    |
| UNC_L    | 0.01         | 0.89         | 0.01         | 0.95         | 0.15         | 0.0430+      | 0.15        | 0.0198+     | 0.14        | 0.06        | 0.15        | 0.0310+     | 0.05        | 0.68        | 0.06        | 0.50        | 0.00        | 0.98        | 0.01        | 0.93        | -0.02 | 0.94 | 0.00  | 0.98    |
| UNC_R    | 0.05         | 0.67         | 0.04         | 0.91         | 0.17         | 0.0347+      | 0.21        | 0.0031++    | 0.19        | 0.0121+     | 0.21        | 0.0017++    | 0.04        | 0.68        | 0.08        | 0.32        | 0.08        | 0.71        | 0.12        | 0.16        | -0.01 | 0.94 | 0.04  | 0.77    |
| Genu     | 0.06         | 0.66         | 0.03         | 0.91         | 0.09         | 0.20         | 0.12        | 0.07        | 0.19        | 0.0121+     | 0.24        | 0.0013++    | 0.11        | 0.24        | 0.13        | 0.11        | 0.04        | 0.83        | 0.07        | 0.46        | -0.03 | 0.94 | 0.01  | 0.92    |
| Rost     | 0.00         | 0.95         | -0.02        | 0.93         | 0.13         | 0.07         | 0.17        | 0.0170+     | 0.15        | 0.0317+     | 0.19        | 0.0053++    | 0.01        | 0.93        | 0.04        | 0.59        | -0.01       | 0.98        | 0.03        | 0.84        | -0.03 | 0.94 | 0.02  | 0.91    |
| Splen    | 0.23         | 0.0084++     | 0.19         | 0.0401+      | 0.19         | 0.0281+      | 0.24        | 0.0017++    | 0.25        | 0.0017++    | 0.30        | <.0001+++   | 0.17        | 0.08        | 0.21        | 0.0136+     | 0.13        | 0.44        | 0.17        | 0.07        | 0.10  | 0.39 | 0.15  | 0.05    |

Table 6.4.a: Comparison between Age-Sex Corrected and Unadjusted Correlations –AD at age 1 and MSEL Scores at age 2

Tables display Pearson's correlations by each tract with FDR-corrected p-values. Age-Sex models are corrected for age at 1-year MRI and age at 2-year MSEL testing. Cells highlighted in yellow are significant in one model (i.e. unadjusted *or* Age-Sex), cells in yellow are significant in both models, and cells highlighted in gray are of a similar magnitude/trend to those significant in the other model.

| Tract    | Age - Sex<br>AD 1 - ELC 2 |      | Unadjusted<br>AD 1 - ELC 2 |      | Age - Sex<br>AD 1 - GM 2 |      | Unadjusted<br>AD 1 - GM 2 |      | Age - Sex<br>AD 1 - FM 2 |      | Unadjusted<br>AD 1 - FM 2 |      | Age - Sex<br>AD 1 - EL 2 |      | Unadjusted<br>AD 1 - EL 2 |      | Age - Sex<br>AD 1 - RL 2 |      | Unadjusted<br>AD 1 - RL 2 |      | Age - Sex<br>AD 1 - VR 2 |      | Unadjusted<br>AD 1 - VR 2 |      |
|----------|---------------------------|------|----------------------------|------|--------------------------|------|---------------------------|------|--------------------------|------|---------------------------|------|--------------------------|------|---------------------------|------|--------------------------|------|---------------------------|------|--------------------------|------|---------------------------|------|
|          | Pearson's                 | fd   | Pearson's                  | fd   | Pearson's                | fd   | Pearson's                 | fd   | Pearson's                | fd   | Pearson's                 | fd   | Pearson's                | fd   | Pearson's                 | fd   | Pearson's                | fd   | Pearson's                 | fd   | Pearson's                | fd   | Pearson's                 | fd   |
| ARC_FP   | 0.04                      | 0.94 | 0.03                       | 0.97 | 0.03                     | 0.80 | 0.04                      | 0.81 | -0.02                    | 0.81 | -0.02                     | 0.86 | 0.05                     | 0.94 | 0.05                      | 0.97 | 0.04                     | 0.96 | 0.04                      | 0.94 | 0.02                     | 0.89 | 0.02                      | 0.84 |
| ARC_FP   | -0.06                     | 0.94 | -0.05                      | 0.97 | -0.04                    | 0.79 | -0.05                     | 0.75 | -0.08                    | 0.58 | -0.09                     | 0.49 | -0.02                    | 0.94 | -0.03                     | 0.97 | -0.03                    | 0.96 | -0.03                     | 0.94 | -0.05                    | 0.89 | -0.06                     | 0.84 |
| ARC_FT   | -0.04                     | 0.94 | -0.06                      | 0.97 | 0.06                     | 0.76 | 0.05                      | 0.75 | -0.12                    | 0.45 | -0.14                     | 0.37 | -0.01                    | 0.94 | -0.04                     | 0.97 | -0.02                    | 0.96 | -0.02                     | 0.94 | -0.05                    | 0.89 | -0.07                     | 0.84 |
| ARC_FT   | 0.00                      | 0.99 | -0.01                      | 0.97 | 0.03                     | 0.86 | 0.01                      | 0.94 | -0.03                    | 0.81 | -0.05                     | 0.70 | 0.02                     | 0.94 | 0.01                      | 0.97 | 0.05                     | 0.96 | 0.05                      | 0.94 | -0.03                    | 0.89 | -0.04                     | 0.84 |
| ARC_TP   | -0.09                     | 0.94 | -0.09                      | 0.96 | 0.07                     | 0.69 | 0.06                      | 0.75 | -0.11                    | 0.45 | -0.11                     | 0.39 | -0.04                    | 0.94 | -0.04                     | 0.97 | -0.12                    | 0.96 | -0.12                     | 0.86 | -0.10                    | 0.89 | -0.10                     | 0.84 |
| ARC_TP   | -0.01                     | 0.96 | 0.01                       | 0.97 | 0.15                     | 0.32 | 0.12                      | 0.52 | 0.06                     | 0.67 | 0.06                      | 0.68 | 0.00                     | 0.99 | -0.01                     | 0.97 | 0.01                     | 0.97 | 0.02                      | 0.94 | -0.06                    | 0.89 | -0.06                     | 0.84 |
| CF_M_L   | 0.07                      | 0.94 | -0.10                      | 0.96 | 0.14                     | 0.34 | 0.13                      | 0.45 | 0.03                     | 0.81 | 0.04                      | 0.73 | -0.13                    | 0.94 | -0.12                     | 0.96 | -0.01                    | 0.96 | 0.01                      | 0.94 | 0.06                     | 0.89 | -0.07                     | 0.84 |
| CF_M_R   | 0.01                      | 0.96 | -0.02                      | 0.97 | 0.11                     | 0.50 | 0.11                      | 0.52 | 0.03                     | 0.81 | 0.01                      | 0.93 | -0.04                    | 0.94 | -0.04                     | 0.97 | 0.05                     | 0.96 | 0.06                      | 0.94 | 0.00                     | 0.99 | -0.02                     | 0.84 |
| Cng_L    | -0.11                     | 0.94 | -0.15                      | 0.62 | 0.04                     | 0.80 | 0.05                      | 0.75 | -0.12                    | 0.45 | -0.15                     | 0.37 | -0.09                    | 0.94 | -0.12                     | 0.96 | -0.08                    | 0.96 | -0.10                     | 0.92 | -0.06                    | 0.89 | -0.07                     | 0.84 |
| Cng_R    | -0.20                     | 0.14 | -0.21                      | 0.09 | 0.02                     | 0.86 | 0.03                      | 0.83 | -0.19                    | 0.20 | -0.20                     | 0.12 | -0.12                    | 0.94 | -0.15                     | 0.96 | -0.16                    | 0.91 | -0.15                     | 0.86 | -0.17                    | 0.49 | -0.17                     | 0.42 |
| CT_M_L   | -0.07                     | 0.94 | -0.09                      | 0.96 | 0.08                     | 0.69 | 0.07                      | 0.73 | -0.06                    | 0.67 | -0.07                     | 0.61 | -0.11                    | 0.94 | -0.10                     | 0.97 | -0.02                    | 0.96 | -0.01                     | 0.94 | -0.03                    | 0.89 | -0.04                     | 0.84 |
| CT_M_R   | 0.07                      | 0.94 | 0.04                       | 0.97 | 0.08                     | 0.69 | 0.08                      | 0.73 | 0.02                     | 0.81 | 0.02                      | 0.86 | 0.01                     | 0.94 | 0.02                      | 0.97 | 0.12                     | 0.96 | 0.13                      | 0.86 | 0.09                     | 0.89 | 0.07                      | 0.84 |
| CT_Par_L | -0.09                     | 0.94 | -0.08                      | 0.97 | 0.06                     | 0.69 | 0.04                      | 0.75 | -0.12                    | 0.45 | -0.13                     | 0.37 | -0.09                    | 0.94 | -0.08                     | 0.97 | -0.05                    | 0.96 | -0.03                     | 0.94 | -0.06                    | 0.89 | -0.07                     | 0.84 |
| CT_Par_R | 0.05                      | 0.94 | 0.02                       | 0.97 | 0.02                     | 0.86 | 0.01                      | 0.92 | -0.05                    | 0.68 | -0.06                     | 0.61 | 0.05                     | 0.94 | 0.05                      | 0.97 | 0.07                     | 0.96 | 0.08                      | 0.94 | 0.05                     | 0.89 | 0.04                      | 0.84 |
| CT_PFC   | -0.03                     | 0.94 | -0.04                      | 0.97 | 0.05                     | 0.79 | 0.03                      | 0.81 | -0.06                    | 0.67 | -0.07                     | 0.61 | 0.02                     | 0.94 | 0.03                      | 0.97 | -0.05                    | 0.96 | -0.04                     | 0.94 | -0.02                    | 0.90 | -0.04                     | 0.84 |
| CT_PFC   | 0.03                      | 0.94 | -0.03                      | 0.97 | 0.06                     | 0.69 | 0.05                      | 0.75 | 0.05                     | 0.67 | 0.05                      | 0.68 | 0.00                     | 0.99 | 0.01                      | 0.97 | 0.00                     | 0.97 | 0.01                      | 0.94 | 0.04                     | 0.89 | -0.04                     | 0.84 |
| CT_PM_L  | -0.02                     | 0.94 | -0.04                      | 0.97 | 0.15                     | 0.32 | 0.14                      | 0.45 | -0.05                    | 0.67 | -0.07                     | 0.61 | -0.05                    | 0.94 | -0.05                     | 0.97 | 0.06                     | 0.96 | 0.06                      | 0.94 | -0.03                    | 0.89 | -0.05                     | 0.84 |
| CT_PM_R  | 0.04                      | 0.94 | 0.00                       | 0.98 | 0.04                     | 0.79 | 0.04                      | 0.75 | -0.02                    | 0.82 | -0.02                     | 0.85 | -0.02                    | 0.94 | 0.00                      | 0.97 | 0.10                     | 0.96 | 0.11                      | 0.86 | 0.06                     | 0.89 | 0.04                      | 0.84 |
| IFOB_L   | 0.00                      | 0.99 | -0.01                      | 0.97 | 0.10                     | 0.62 | 0.09                      | 0.73 | -0.10                    | 0.52 | -0.12                     | 0.37 | 0.06                     | 0.94 | 0.03                      | 0.97 | 0.02                     | 0.96 | 0.00                      | 0.97 | 0.00                     | 0.99 | -0.02                     | 0.85 |
| IFOB_R   | -0.09                     | 0.94 | -0.11                      | 0.96 | 0.07                     | 0.69 | 0.08                      | 0.73 | -0.16                    | 0.45 | -0.16                     | 0.31 | -0.03                    | 0.94 | -0.05                     | 0.97 | -0.03                    | 0.96 | -0.03                     | 0.94 | -0.09                    | 0.89 | -0.10                     | 0.84 |
| ILF_L    | 0.04                      | 0.94 | 0.01                       | 0.97 | 0.12                     | 0.50 | 0.11                      | 0.52 | -0.07                    | 0.67 | -0.10                     | 0.44 | 0.05                     | 0.94 | 0.01                      | 0.97 | 0.03                     | 0.96 | 0.01                      | 0.94 | 0.05                     | 0.89 | 0.03                      | 0.84 |
| ILF_R    | -0.04                     | 0.94 | -0.07                      | 0.97 | 0.08                     | 0.69 | 0.09                      | 0.73 | -0.11                    | 0.45 | -0.12                     | 0.37 | -0.04                    | 0.94 | -0.06                     | 0.97 | 0.02                     | 0.96 | 0.02                      | 0.94 | -0.05                    | 0.89 | -0.06                     | 0.84 |
| SLF_L    | -0.06                     | 0.94 | -0.07                      | 0.97 | 0.02                     | 0.86 | 0.02                      | 0.88 | -0.09                    | 0.58 | -0.10                     | 0.44 | -0.02                    | 0.94 | -0.03                     | 0.97 | -0.06                    | 0.96 | -0.06                     | 0.94 | -0.06                    | 0.89 | -0.07                     | 0.84 |
| SLF_R    | 0.00                      | 0.99 | 0.02                       | 0.97 | 0.02                     | 0.86 | 0.00                      | 0.96 | -0.06                    | 0.67 | -0.05                     | 0.68 | 0.02                     | 0.94 | 0.02                      | 0.97 | 0.04                     | 0.96 | 0.06                      | 0.94 | 0.00                     | 0.99 | 0.01                      | 0.93 |
| UNC_L    | -0.02                     | 0.96 | -0.02                      | 0.97 | 0.15                     | 0.32 | 0.14                      | 0.45 | 0.05                     | 0.67 | 0.07                      | 0.61 | 0.02                     | 0.94 | 0.01                      | 0.97 | 0.01                     | 0.96 | 0.01                      | 0.94 | 0.02                     | 0.91 | -0.03                     | 0.84 |
| UNC_R    | -0.04                     | 0.94 | -0.03                      | 0.97 | 0.15                     | 0.32 | 0.14                      | 0.45 | 0.11                     | 0.45 | -0.10                     | 0.44 | 0.03                     | 0.94 | 0.05                      | 0.97 | 0.01                     | 0.97 | 0.01                      | 0.94 | -0.04                    | 0.89 | -0.03                     | 0.84 |
| Genu     | 0.03                      | 0.94 | 0.02                       | 0.97 | 0.09                     | 0.69 | 0.06                      | 0.75 | -0.03                    | 0.81 | -0.03                     | 0.79 | 0.03                     | 0.94 | 0.04                      | 0.97 | 0.04                     | 0.96 | 0.05                      | 0.94 | 0.05                     | 0.89 | 0.03                      | 0.84 |
| Rost     | -0.13                     | 0.94 | -0.10                      | 0.96 | -0.01                    | 0.94 | -0.05                     | 0.75 | -0.12                    | 0.45 | -0.12                     | 0.37 | -0.09                    | 0.94 | -0.07                     | 0.97 | -0.10                    | 0.96 | -0.08                     | 0.94 | -0.09                    | 0.89 | -0.10                     | 0.84 |
| Splen    | 0.05                      | 0.94 | 0.04                       | 0.97 | 0.04                     | 0.79 | 0.02                      | 0.88 | 0.02                     | 0.81 | -0.01                     | 0.94 | 0.04                     | 0.94 | 0.01                      | 0.97 | 0.02                     | 0.96 | 0.02                      | 0.94 | 0.04                     | 0.89 | 0.02                      | 0.84 |

Table 6.4.b: Comparison between Age-Sex Corrected and Unadjusted Correlations –RD at age 1 and MSEL Scores at age 2

Tables display Pearson's correlations by each tract with FDR-corrected p-values. Age-Sex models are corrected for age at 1-year MRI and age at 2-year MSEL testing. Cells highlighted in yellow are significant in one model (i.e. unadjusted *or* Age-Sex), cells in yellow are significant in both models, and cells highlighted in gray are of a similar magnitude/trend to those significant in the other model.

| Tract    | Age - Sex<br>RD 1 - ELC 2 |          | Unadjusted<br>RD 1 - ELC 2 |          | Age - Sex<br>RD 1 - GM 2 |          | Unadjusted<br>RD 1 - GM 2 |          | Age - Sex<br>RD 1 - FM 2 |          | Unadjusted<br>RD 1 - FM 2 |          | Age - Sex<br>RD 1 - EL 2 |          | Unadjusted<br>RD 1 - EL 2 |          | Age - Sex<br>RD 1 - RL 2 |          | Unadjusted<br>RD 1 - RL 2 |          | Age - Sex<br>RD 1 - VR 2 |          | Unadjusted<br>RD 1 - VR 2 |          |
|----------|---------------------------|----------|----------------------------|----------|--------------------------|----------|---------------------------|----------|--------------------------|----------|---------------------------|----------|--------------------------|----------|---------------------------|----------|--------------------------|----------|---------------------------|----------|--------------------------|----------|---------------------------|----------|
|          | Pearson's                 | fdR Pval | Pearson's                  | fdR Pval | Pearson's                | fdR Pval | Pearson's                 | fdR Pval | Pearson's                | fdR Pval | Pearson's                 | fdR Pval | Pearson's                | fdR Pval | Pearson's                 | fdR Pval | Pearson's                | fdR Pval | Pearson's                 | fdR Pval | Pearson's                | fdR Pval | Pearson's                 | fdR Pval |
| ARC_FP   | -0.04                     | 0.91     | -0.05                      | 0.88     | 0.09                     | 0.68     | 0.09                      | 0.83     | -0.12                    | 0.32     | -0.11                     | 0.29     | -0.04                    | 0.99     | -0.03                     | 0.98     | 0.00                     | 0.96     | 0.01                      | 0.97     | -0.04                    | 0.96     | -0.04                     | 0.97     |
| ARC_FP   | 0.01                      | 0.91     | 0.03                       | 0.88     | 0.09                     | 0.68     | 0.08                      | 0.83     | -0.06                    | 0.43     | -0.05                     | 0.51     | 0.02                     | 0.99     | 0.03                      | 0.98     | 0.04                     | 0.96     | 0.07                      | 0.97     | 0.00                     | 1.00     | 0.01                      | 0.97     |
| ARC_FT   | 0.02                      | 0.91     | 0.01                       | 0.93     | 0.10                     | 0.68     | 0.10                      | 0.83     | -0.08                    | 0.36     | -0.08                     | 0.38     | 0.02                     | 0.99     | 0.03                      | 0.98     | 0.06                     | 0.96     | 0.07                      | 0.97     | 0.01                     | 1.00     | 0.00                      | 0.97     |
| ARC_FT   | -0.05                     | 0.91     | -0.03                      | 0.88     | 0.08                     | 0.68     | 0.04                      | 0.84     | -0.10                    | 0.33     | -0.09                     | 0.36     | 0.01                     | 0.99     | 0.03                      | 0.98     | -0.01                    | 0.96     | 0.02                      | 0.97     | -0.07                    | 0.96     | -0.07                     | 0.97     |
| ARC_TP   | -0.04                     | 0.91     | -0.03                      | 0.88     | 0.07                     | 0.68     | 0.05                      | 0.84     | -0.10                    | 0.33     | -0.10                     | 0.34     | -0.02                    | 0.99     | -0.02                     | 0.98     | -0.03                    | 0.96     | -0.02                     | 0.97     | -0.03                    | 0.96     | -0.03                     | 0.97     |
| ARC_TP   | -0.08                     | 0.91     | -0.07                      | 0.83     | 0.01                     | 0.89     | -0.01                     | 0.95     | -0.13                    | 0.25     | -0.13                     | 0.25     | -0.06                    | 0.99     | -0.06                     | 0.98     | -0.05                    | 0.96     | -0.03                     | 0.97     | -0.05                    | 0.96     | -0.06                     | 0.97     |
| CF_M_L   | 0.12                      | 0.91     | 0.12                       | 0.83     | 0.07                     | 0.68     | 0.07                      | 0.83     | 0.13                     | 0.24     | 0.12                      | 0.29     | 0.11                     | 0.99     | 0.09                      | 0.98     | -0.08                    | 0.96     | 0.06                      | 0.97     | 0.09                     | 0.96     | -0.08                     | 0.97     |
| CF_M_R   | -0.14                     | 0.91     | -0.15                      | 0.83     | 0.04                     | 0.87     | 0.05                      | 0.84     | -0.16                    | 0.24     | -0.14                     | 0.25     | -0.14                    | 0.99     | -0.10                     | 0.98     | -0.10                    | 0.96     | -0.07                     | 0.97     | -0.11                    | 0.96     | -0.11                     | 0.97     |
| Cng_L    | 0.01                      | 0.95     | 0.02                       | 0.88     | 0.05                     | 0.87     | 0.04                      | 0.84     | -0.07                    | 0.40     | -0.05                     | 0.53     | -0.01                    | 0.99     | 0.02                      | 0.98     | 0.05                     | 0.96     | 0.07                      | 0.97     | 0.03                     | 0.96     | 0.04                      | 0.97     |
| Cng_R    | 0.12                      | 0.91     | 0.12                       | 0.83     | 0.11                     | 0.68     | 0.10                      | 0.83     | 0.01                     | 0.87     | 0.02                      | 0.76     | 0.11                     | 0.99     | 0.14                      | 0.98     | 0.15                     | 0.96     | 0.16                      | 0.68     | 0.11                     | 0.96     | 0.10                      | 0.97     |
| CT_M_L   | -0.10                     | 0.91     | -0.11                      | 0.83     | 0.03                     | 0.87     | 0.03                      | 0.84     | -0.13                    | 0.24     | -0.13                     | 0.25     | -0.08                    | 0.99     | -0.06                     | 0.98     | -0.05                    | 0.96     | -0.04                     | 0.97     | -0.07                    | 0.96     | -0.07                     | 0.97     |
| CT_M_R   | -0.05                     | 0.91     | -0.09                      | 0.83     | -0.02                    | 0.89     | 0.01                      | 0.95     | -0.09                    | 0.34     | -0.08                     | 0.36     | -0.07                    | 0.99     | -0.05                     | 0.98     | -0.01                    | 0.96     | 0.00                      | 0.97     | 0.00                     | 1.00     | -0.01                     | 0.97     |
| CT_Par_L | -0.08                     | 0.91     | -0.06                      | 0.83     | 0.07                     | 0.68     | 0.05                      | 0.84     | -0.11                    | 0.33     | -0.10                     | 0.34     | -0.04                    | 0.99     | -0.03                     | 0.98     | -0.04                    | 0.96     | -0.02                     | 0.97     | -0.07                    | 0.96     | -0.07                     | 0.97     |
| CT_Par_R | 0.00                      | 0.95     | -0.01                      | 0.93     | 0.07                     | 0.68     | 0.06                      | 0.84     | -0.08                    | 0.35     | -0.09                     | 0.36     | 0.01                     | 0.99     | 0.01                      | 0.98     | 0.04                     | 0.96     | 0.05                      | 0.97     | 0.01                     | 1.00     | 0.00                      | 0.97     |
| CT_PFC   | -0.02                     | 0.91     | -0.03                      | 0.88     | 0.01                     | 0.89     | 0.00                      | 0.95     | -0.06                    | 0.43     | -0.07                     | 0.42     | 0.01                     | 0.99     | 0.02                      | 0.98     | -0.03                    | 0.96     | -0.02                     | 0.97     | 0.01                     | 1.00     | -0.01                     | 0.97     |
| CT_PFC   | -0.06                     | 0.91     | -0.06                      | 0.83     | 0.05                     | 0.87     | 0.03                      | 0.84     | -0.14                    | 0.24     | -0.13                     | 0.25     | -0.02                    | 0.99     | 0.00                      | 0.98     | -0.02                    | 0.96     | 0.00                      | 0.97     | 0.05                     | 0.96     | -0.06                     | 0.97     |
| CT_PM_L  | -0.05                     | 0.91     | -0.06                      | 0.83     | 0.16                     | 0.68     | 0.16                      | 0.78     | -0.10                    | 0.33     | -0.10                     | 0.34     | -0.02                    | 0.99     | 0.00                      | 0.98     | 0.01                     | 0.96     | 0.03                      | 0.97     | -0.05                    | 0.96     | -0.06                     | 0.97     |
| CT_PM_R  | -0.03                     | 0.91     | -0.06                      | 0.83     | 0.01                     | 0.89     | 0.03                      | 0.84     | -0.10                    | 0.33     | -0.09                     | 0.34     | -0.04                    | 0.99     | -0.03                     | 0.98     | 0.02                     | 0.96     | 0.03                      | 0.97     | 0.00                     | 1.00     | -0.01                     | 0.97     |
| IFOB_L   | 0.03                      | 0.91     | 0.00                       | 0.96     | 0.03                     | 0.87     | 0.03                      | 0.84     | -0.11                    | 0.33     | -0.13                     | 0.25     | 0.05                     | 0.99     | 0.04                      | 0.98     | 0.07                     | 0.96     | 0.07                      | 0.97     | 0.03                     | 0.96     | 0.01                      | 0.97     |
| IFOB_R   | -0.02                     | 0.91     | -0.05                      | 0.88     | 0.03                     | 0.87     | 0.03                      | 0.84     | -0.15                    | 0.24     | -0.16                     | 0.25     | 0.00                     | 0.99     | 0.00                      | 0.98     | 0.04                     | 0.96     | 0.06                      | 0.97     | -0.04                    | 0.96     | -0.05                     | 0.97     |
| ILF_L    | 0.04                      | 0.91     | 0.01                       | 0.93     | 0.03                     | 0.87     | 0.02                      | 0.85     | -0.09                    | 0.34     | -0.11                     | 0.29     | 0.10                     | 0.99     | 0.08                      | 0.98     | 0.03                     | 0.96     | 0.03                      | 0.97     | 0.04                     | 0.96     | 0.02                      | 0.97     |
| ILF_R    | -0.05                     | 0.91     | -0.07                      | 0.83     | 0.04                     | 0.87     | 0.03                      | 0.84     | -0.15                    | 0.24     | -0.15                     | 0.25     | -0.02                    | 0.99     | -0.02                     | 0.98     | -0.01                    | 0.96     | 0.00                      | 0.97     | -0.08                    | 0.96     | -0.09                     | 0.97     |
| SLF_L    | -0.06                     | 0.91     | -0.06                      | 0.83     | 0.09                     | 0.68     | 0.08                      | 0.83     | -0.09                    | 0.34     | -0.09                     | 0.36     | -0.06                    | 0.99     | -0.05                     | 0.98     | -0.05                    | 0.96     | -0.04                     | 0.97     | -0.06                    | 0.96     | -0.07                     | 0.97     |
| SLF_R    | -0.04                     | 0.91     | -0.03                      | 0.88     | 0.11                     | 0.68     | 0.10                      | 0.83     | -0.09                    | 0.34     | -0.08                     | 0.36     | 0.00                     | 0.99     | 0.01                      | 0.98     | -0.01                    | 0.96     | 0.01                      | 0.97     | -0.03                    | 0.96     | -0.03                     | 0.97     |
| UNC_L    | -0.06                     | 0.91     | -0.09                      | 0.83     | 0.07                     | 0.68     | 0.08                      | 0.83     | -0.16                    | 0.24     | -0.17                     | 0.25     | -0.03                    | 0.99     | -0.02                     | 0.98     | 0.02                     | 0.96     | 0.02                      | 0.97     | 0.07                     | 0.96     | -0.08                     | 0.97     |
| UNC_R    | -0.03                     | 0.91     | -0.04                      | 0.88     | 0.03                     | 0.87     | 0.03                      | 0.84     | -0.15                    | 0.24     | -0.15                     | 0.25     | -0.02                    | 0.99     | 0.01                      | 0.98     | 0.03                     | 0.96     | 0.04                      | 0.97     | -0.02                    | 0.96     | -0.03                     | 0.97     |
| Genu     | 0.08                      | 0.91     | 0.07                       | 0.83     | -0.01                    | 0.89     | -0.02                     | 0.85     | -0.05                    | 0.52     | -0.03                     | 0.67     | 0.05                     | 0.99     | 0.07                      | 0.98     | 0.07                     | 0.96     | 0.09                      | 0.97     | 0.13                     | 0.96     | 0.12                      | 0.97     |
| Rost     | 0.03                      | 0.91     | 0.04                       | 0.88     | -0.10                    | 0.68     | -0.13                     | 0.83     | -0.07                    | 0.40     | -0.07                     | 0.42     | 0.02                     | 0.99     | 0.04                      | 0.98     | 0.05                     | 0.96     | 0.07                      | 0.97     | 0.06                     | 0.96     | 0.05                      | 0.97     |
| Splen    | 0.02                      | 0.91     | 0.02                       | 0.88     | 0.11                     | 0.68     | 0.10                      | 0.83     | -0.07                    | 0.40     | -0.07                     | 0.42     | -0.01                    | 0.99     | 0.00                      | 0.98     | 0.02                     | 0.96     | 0.03                      | 0.97     | 0.02                     | 0.96     | 0.02                      | 0.97     |

Table 6.4.c: Comparison between Age-Sex Corrected and Unadjusted Correlations –FA at age 1 and MSEL Scores at age 2

Tables display Pearson's correlations by each tract with FDR-corrected p-values. Age-Sex models are corrected for age at 1-year MRI and age at 2-year MSEL testing. Cells highlighted in yellow are significant in one model (i.e. unadjusted *or* Age-Sex), cells in yellow are significant in both models, and cells highlighted in gray are of a similar magnitude/trend to those significant in the other model.

| Tract    | Age - Sex<br>FA 1 - ELC 2 |         | Unadjusted<br>FA 1 - ELC 2 |         | Age - Sex<br>FA 1 - GM 2 |      | Unadjusted<br>FA 1 - GM2 |      | Age - Sex<br>FA 1 - FM 2 |         | Unadjusted<br>FA 1 - FM2 |         | Age - Sex<br>FA 1 - EL 2 |      | Unadjusted<br>FA 1 - EL2 |      | Age - Sex<br>FA 1 - RL 2 |         | Unadjusted<br>FA 1 - RL2 |         | Age - Sex<br>FA 1 - VR 2 |      | Unadjusted<br>FA 1 - VR2 |      |           |    |   |
|----------|---------------------------|---------|----------------------------|---------|--------------------------|------|--------------------------|------|--------------------------|---------|--------------------------|---------|--------------------------|------|--------------------------|------|--------------------------|---------|--------------------------|---------|--------------------------|------|--------------------------|------|-----------|----|---|
|          | Pearson's                 | fd      | r                          | Pval    | Pearson's                | fd   | r                        | Pval | Pearson's                | fd      | r                        | Pval    | Pearson's                | fd   | r                        | Pval | Pearson's                | fd      | r                        | Pval    | Pearson's                | fd   | r                        | Pval | Pearson's | fd | r |
| ARC_FP   | 0.05                      | 0.87    | 0.05                       | 0.99    | -0.06                    | 0.87 | -0.06                    | 0.95 | 0.12                     | 0.28    | 0.12                     | 0.45    | 0.06                     | 0.93 | 0.05                     | 0.97 | -0.02                    | 0.99    | -0.03                    | 0.96    | 0.05                     | 0.90 | 0.05                     | 0.98 |           |    |   |
| ARC_FP   | -0.09                     | 0.80    | -0.08                      | 0.88    | -0.11                    | 0.74 | -0.11                    | 0.83 | -0.01                    | 0.93    | -0.01                    | 0.88    | -0.07                    | 0.93 | -0.07                    | 0.97 | -0.12                    | 0.66    | -0.13                    | 0.49    | -0.06                    | 0.90 | -0.06                    | 0.98 |           |    |   |
| ARC_FT   | -0.02                     | 0.87    | -0.02                      | 0.99    | -0.06                    | 0.87 | -0.06                    | 0.95 | 0.07                     | 0.50    | 0.05                     | 0.60    | -0.03                    | 0.93 | -0.06                    | 0.97 | -0.08                    | 0.81    | -0.10                    | 0.67    | -0.01                    | 0.95 | -0.01                    | 1.00 |           |    |   |
| ARC_FT   | 0.06                      | 0.87    | 0.02                       | 0.99    | -0.05                    | 0.87 | -0.03                    | 0.98 | 0.13                     | 0.28    | 0.10                     | 0.46    | -0.01                    | 0.93 | -0.04                    | 0.97 | 0.00                     | 0.99    | -0.03                    | 0.96    | 0.07                     | 0.90 | 0.05                     | 0.98 |           |    |   |
| ARC_TP   | -0.04                     | 0.87    | -0.03                      | 0.99    | -0.02                    | 0.90 | -0.02                    | 0.98 | 0.05                     | 0.62    | 0.05                     | 0.60    | -0.04                    | 0.93 | -0.04                    | 0.97 | -0.09                    | 0.81    | -0.10                    | 0.66    | -0.04                    | 0.90 | -0.03                    | 0.98 |           |    |   |
| ARC_TP   | 0.11                      | 0.80    | 0.12                       | 0.53    | 0.13                     | 0.74 | 0.13                     | 0.80 | 0.23                     | 0.0269+ | 0.23                     | 0.0385+ | 0.07                     | 0.93 | 0.07                     | 0.97 | 0.07                     | 0.91    | 0.06                     | 0.92    | 0.04                     | 0.90 | 0.05                     | 0.98 |           |    |   |
| CF_M_L   | 0.09                      | 0.80    | 0.07                       | 0.88    | 0.01                     | 0.97 | -0.01                    | 0.98 | 0.13                     | 0.28    | 0.09                     | 0.47    | 0.05                     | 0.93 | 0.02                     | 0.97 | 0.08                     | 0.81    | 0.06                     | 0.92    | 0.06                     | 0.90 | 0.05                     | 0.98 |           |    |   |
| CF_M_R   | 0.19                      | 0.10    | 0.18                       | 0.16    | 0.01                     | 0.94 | 0.00                     | 0.98 | 0.22                     | 0.0269+ | 0.19                     | 0.12    | 0.15                     | 0.61 | 0.10                     | 0.97 | 0.15                     | 0.42    | 0.12                     | 0.49    | 0.15                     | 0.28 | 0.14                     | 0.38 |           |    |   |
| Cng_L    | -0.08                     | 0.80    | -0.12                      | 0.53    | -0.02                    | 0.90 | 0.00                     | 0.98 | 0.00                     | 1.00    | -0.04                    | 0.63    | -0.07                    | 0.93 | -0.12                    | 0.97 | -0.11                    | 0.66    | -0.14                    | 0.47    | -0.07                    | 0.90 | -0.09                    | 0.98 |           |    |   |
| Cng_R    | -0.25                     | 0.0142+ | -0.24                      | 0.0158+ | -0.09                    | 0.74 | -0.07                    | 0.95 | -0.15                    | 0.28    | -0.16                    | 0.23    | -0.18                    | 0.37 | -0.22                    | 0.06 | -0.24                    | 0.0186+ | -0.25                    | 0.0131+ | -0.22                    | 0.06 | -0.21                    | 0.08 |           |    |   |
| CT_M_L   | 0.04                      | 0.87    | 0.03                       | 0.99    | -0.03                    | 0.90 | -0.04                    | 0.95 | 0.07                     | 0.50    | 0.06                     | 0.60    | -0.01                    | 0.93 | -0.02                    | 0.97 | 0.04                     | 0.97    | 0.02                     | 0.96    | 0.04                     | 0.90 | 0.03                     | 1.00 |           |    |   |
| CT_M_R   | 0.09                      | 0.80    | 0.11                       | 0.53    | 0.03                     | 0.90 | 0.01                     | 0.98 | 0.12                     | 0.28    | 0.11                     | 0.45    | 0.07                     | 0.93 | 0.06                     | 0.97 | 0.05                     | 0.97    | 0.05                     | 0.92    | 0.06                     | 0.90 | 0.06                     | 0.98 |           |    |   |
| CT_Par_L | 0.04                      | 0.87    | 0.03                       | 0.99    | -0.02                    | 0.90 | -0.02                    | 0.98 | 0.07                     | 0.50    | 0.05                     | 0.60    | -0.04                    | 0.93 | -0.07                    | 0.97 | 0.03                     | 0.98    | 0.01                     | 0.98    | 0.06                     | 0.90 | 0.05                     | 0.98 |           |    |   |
| CT_Par_R | 0.06                      | 0.87    | 0.05                       | 0.99    | -0.09                    | 0.74 | -0.09                    | 0.83 | 0.10                     | 0.42    | 0.09                     | 0.47    | 0.02                     | 0.93 | 0.02                     | 0.97 | 0.01                     | 0.99    | 0.00                     | 0.98    | 0.06                     | 0.90 | 0.05                     | 0.98 |           |    |   |
| CT_PFC   | -0.01                     | 0.91    | -0.01                      | 0.99    | 0.04                     | 0.90 | 0.04                     | 0.95 | 0.04                     | 0.62    | 0.04                     | 0.70    | -0.01                    | 0.93 | -0.03                    | 0.97 | -0.04                    | 0.97    | -0.05                    | 0.92    | -0.04                    | 0.90 | -0.04                    | 0.98 |           |    |   |
| CT_PFC   | 0.02                      | 0.87    | 0.01                       | 0.99    | 0.00                     | 0.98 | 0.01                     | 0.98 | 0.12                     | 0.30    | 0.10                     | 0.46    | -0.01                    | 0.93 | 0.01                     | 0.97 | -0.04                    | 0.97    | -0.05                    | 0.92    | 0.01                     | 0.95 | 0.01                     | 1.00 |           |    |   |
| CT_PM_L  | 0.06                      | 0.87    | 0.05                       | 0.99    | -0.10                    | 0.74 | -0.10                    | 0.83 | 0.08                     | 0.50    | 0.06                     | 0.60    | 0.01                     | 0.93 | -0.03                    | 0.97 | 0.04                     | 0.97    | 0.03                     | 0.96    | 0.05                     | 0.90 | 0.04                     | 0.98 |           |    |   |
| CT_PM_R  | 0.05                      | 0.87    | 0.05                       | 0.99    | -0.02                    | 0.90 | -0.03                    | 0.95 | 0.10                     | 0.37    | 0.09                     | 0.47    | 0.02                     | 0.93 | 0.01                     | 0.97 | 0.01                     | 0.99    | 0.01                     | 0.98    | 0.03                     | 0.90 | 0.03                     | 1.00 |           |    |   |
| IFOB_L   | -0.03                     | 0.87    | 0.00                       | 0.99    | 0.05                     | 0.87 | 0.03                     | 0.95 | 0.06                     | 0.55    | 0.06                     | 0.60    | -0.01                    | 0.93 | -0.02                    | 0.97 | -0.06                    | 0.95    | -0.07                    | 0.90    | -0.02                    | 0.95 | -0.01                    | 1.00 |           |    |   |
| IFOB_R   | -0.03                     | 0.87    | -0.02                      | 0.99    | 0.03                     | 0.90 | 0.03                     | 0.95 | 0.08                     | 0.50    | 0.08                     | 0.55    | -0.02                    | 0.93 | -0.03                    | 0.97 | -0.08                    | 0.87    | -0.09                    | 0.68    | -0.02                    | 0.95 | -0.01                    | 1.00 |           |    |   |
| ILF_L    | -0.02                     | 0.87    | 0.00                       | 0.99    | 0.06                     | 0.87 | 0.06                     | 0.95 | 0.06                     | 0.55    | 0.06                     | 0.60    | -0.07                    | 0.93 | -0.08                    | 0.97 | -0.03                    | 0.98    | -0.04                    | 0.93    | -0.02                    | 0.95 | 0.00                     | 1.00 |           |    |   |
| ILF_R    | 0.06                      | 0.87    | 0.06                       | 0.97    | -0.02                    | 0.90 | -0.01                    | 0.98 | 0.12                     | 0.30    | 0.12                     | 0.45    | 0.02                     | 0.93 | 0.01                     | 0.97 | 0.02                     | 0.98    | 0.01                     | 0.98    | 0.08                     | 0.90 | 0.08                     | 0.98 |           |    |   |
| SLF_L    | 0.00                      | 0.99    | 0.00                       | 0.99    | -0.06                    | 0.87 | -0.05                    | 0.95 | 0.06                     | 0.55    | 0.05                     | 0.60    | 0.02                     | 0.93 | 0.00                     | 0.99 | -0.04                    | 0.97    | -0.06                    | 0.92    | 0.00                     | 0.95 | 0.00                     | 1.00 |           |    |   |
| SLF_R    | 0.03                      | 0.87    | 0.04                       | 0.99    | -0.13                    | 0.74 | -0.12                    | 0.80 | 0.05                     | 0.60    | 0.05                     | 0.60    | -0.01                    | 0.93 | -0.02                    | 0.97 | 0.01                     | 0.99    | 0.00                     | 0.98    | 0.03                     | 0.90 | 0.04                     | 0.98 |           |    |   |
| UNC_L    | 0.06                      | 0.87    | 0.08                       | 0.87    | 0.06                     | 0.87 | 0.04                     | 0.95 | 0.16                     | 0.28    | 0.14                     | 0.32    | 0.04                     | 0.93 | 0.02                     | 0.97 | 0.00                     | 0.99    | 0.00                     | 0.98    | 0.06                     | 0.90 | 0.06                     | 0.98 |           |    |   |
| UNC_R    | 0.00                      | 0.99    | 0.02                       | 0.99    | 0.09                     | 0.74 | 0.08                     | 0.87 | 0.09                     | 0.45    | 0.09                     | 0.47    | 0.03                     | 0.93 | 0.02                     | 0.97 | -0.03                    | 0.98    | -0.04                    | 0.93    | -0.01                    | 0.95 | 0.00                     | 1.00 |           |    |   |
| Genu     | -0.11                     | 0.80    | -0.11                      | 0.53    | 0.08                     | 0.81 | 0.08                     | 0.87 | 0.04                     | 0.71    | 0.01                     | 0.88    | -0.06                    | 0.93 | -0.09                    | 0.97 | -0.11                    | 0.79    | -0.12                    | 0.49    | -0.16                    | 0.28 | -0.16                    | 0.37 |           |    |   |
| Rost     | -0.14                     | 0.56    | -0.14                      | 0.53    | 0.14                     | 0.74 | 0.15                     | 0.80 | 0.02                     | 0.89    | 0.01                     | 0.88    | -0.10                    | 0.93 | -0.12                    | 0.97 | -0.15                    | 0.42    | -0.16                    | 0.43    | -0.15                    | 0.28 | -0.15                    | 0.37 |           |    |   |
| Splen    | 0.03                      | 0.87    | 0.01                       | 0.99    | -0.10                    | 0.74 | -0.09                    | 0.83 | 0.14                     | 0.28    | 0.11                     | 0.46    | 0.05                     | 0.93 | 0.01                     | 0.97 | 0.00                     | 0.99    | -0.02                    | 0.96    | 0.01                     | 0.95 | 0.00                     | 1.00 |           |    |   |

Table 6.5.a: Comparison between Age-Sex Corrected and Unadjusted Correlations –AD at age 2 and MSEL Scores at age 2

Tables display Pearson’s correlations by each tract with FDR-corrected p-values. Age-Sex models are corrected for age at 2-year visit. Cells highlighted in yellow are significant in one model (i.e. unadjusted *or* Age-Sex), cells in yellow are significant in both models, and cells highlighted in gray are of a similar magnitude/trend to those significant in the other model.

| Tract    | Age - Sex<br>AD 2 - ELC 2 |          | Unadjusted<br>AD 2 - ELC 2 |          | Age - Sex<br>AD 2 - GM2 |          | Unadjusted<br>AD 2 - GM2 |          | Age - Sex<br>AD 2 - FM 2 |          | Unadjusted<br>AD 2 - FM2 |          | Age - Sex<br>AD 2 - EL 2 |          | Unadjusted<br>AD 2 - EL2 |          | Age - Sex<br>AD 2 - RL 2 |          | Unadjusted<br>AD 2 - RL2 |          | Age - Sex<br>AD 2 - VR 2 |          | Unadjusted<br>AD 2 - VR2 |          |
|----------|---------------------------|----------|----------------------------|----------|-------------------------|----------|--------------------------|----------|--------------------------|----------|--------------------------|----------|--------------------------|----------|--------------------------|----------|--------------------------|----------|--------------------------|----------|--------------------------|----------|--------------------------|----------|
|          | Pearson's r               | Idr Pval | Pearson's r                | Idr Pval | Pearson's r             | Idr Pval | Pearson's r              | Idr Pval | Pearson's r              | Idr Pval | Pearson's r              | Idr Pval | Pearson's r              | Idr Pval | Pearson's r              | Idr Pval | Pearson's r              | Idr Pval | Pearson's r              | Idr Pval | Pearson's r              | Idr Pval | Pearson's r              | Idr Pval |
| ARC_FP_L | 0.18                      | 0.47     | 0.17                       | 0.48     | -0.05                   | 0.98     | 0.05                     | 0.89     | -0.05                    | 0.77     | 0.06                     | 0.71     | 0.21                     | 0.17     | 0.19                     | 0.26     | 0.23                     | 0.07     | 0.21                     | 0.13     | 0.13                     | 0.47     | 0.12                     | 0.47     |
| ARC_FP_R | 0.01                      | 1.00     | -0.02                      | 0.97     | -0.03                   | 0.98     | -0.03                    | 0.95     | -0.06                    | 0.74     | -0.08                    | 0.71     | 0.05                     | 0.70     | 0.03                     | 0.80     | 0.07                     | 0.51     | 0.04                     | 0.67     | -0.04                    | 0.96     | -0.04                    | 0.94     |
| ARC_FT_L | 0.00                      | 1.00     | 0.00                       | 0.97     | -0.06                   | 0.97     | -0.08                    | 0.73     | -0.10                    | 0.72     | -0.13                    | 0.62     | 0.05                     | 0.70     | 0.04                     | 0.78     | 0.03                     | 0.77     | 0.02                     | 0.90     | -0.01                    | 0.98     | -0.02                    | 0.98     |
| ARC_FT_R | 0.02                      | 0.99     | 0.03                       | 0.92     | -0.01                   | 0.98     | 0.01                     | 0.95     | -0.03                    | 0.80     | 0.05                     | 0.72     | 0.06                     | 0.70     | 0.05                     | 0.78     | 0.09                     | 0.46     | 0.07                     | 0.48     | 0.03                     | 0.98     | 0.03                     | 0.98     |
| ARC_TP_L | 0.03                      | 0.99     | 0.04                       | 0.91     | -0.09                   | 0.97     | -0.10                    | 0.69     | -0.05                    | 0.77     | -0.05                    | 0.71     | 0.04                     | 0.70     | 0.05                     | 0.78     | 0.05                     | 0.60     | 0.05                     | 0.61     | 0.02                     | 0.98     | 0.02                     | 0.98     |
| ARC_TP_R | 0.01                      | 1.00     | 0.04                       | 0.91     | 0.03                    | 0.98     | 0.02                     | 0.95     | -0.06                    | 0.74     | -0.06                    | 0.71     | 0.04                     | 0.70     | 0.05                     | 0.78     | 0.10                     | 0.43     | 0.11                     | 0.45     | -0.02                    | 0.98     | -0.01                    | 0.98     |
| CF_M_L   | 0.07                      | 0.81     | 0.07                       | 0.76     | -0.04                   | 0.98     | 0.13                     | 0.69     | -0.07                    | 0.74     | 0.02                     | 0.89     | 0.03                     | 0.75     | 0.09                     | 0.68     | 0.10                     | 0.43     | 0.15                     | 0.33     | 0.11                     | 0.47     | 0.03                     | 0.98     |
| CF_M_R   | 0.10                      | 0.58     | 0.10                       | 0.53     | -0.01                   | 0.98     | -0.03                    | 0.95     | -0.04                    | 0.80     | -0.05                    | 0.71     | 0.05                     | 0.70     | 0.04                     | 0.78     | 0.13                     | 0.39     | 0.12                     | 0.39     | 0.11                     | 0.49     | 0.09                     | 0.68     |
| Cing_L   | -0.03                     | 0.99     | 0.00                       | 0.97     | -0.06                   | 0.97     | -0.11                    | 0.69     | -0.10                    | 0.72     | -0.09                    | 0.62     | -0.04                    | 0.70     | 0.02                     | 0.89     | 0.03                     | 0.77     | 0.05                     | 0.61     | 0.05                     | 0.90     | 0.05                     | 0.82     |
| Cing_R   | -0.16                     | 0.47     | -0.13                      | 0.48     | -0.15                   | 0.97     | 0.09                     | 0.69     | -0.16                    | 0.41     | -0.06                    | 0.71     | -0.08                    | 0.70     | -0.13                    | 0.30     | -0.11                    | 0.43     | -0.09                    | 0.45     | -0.09                    | 0.61     | -0.16                    | 0.47     |
| CT_M_L   | 0.00                      | 1.00     | 0.00                       | 0.97     | -0.10                   | 0.97     | 0.11                     | 0.69     | -0.09                    | 0.72     | 0.09                     | 0.62     | 0.01                     | 0.89     | 0.02                     | 0.89     | 0.05                     | 0.60     | 0.05                     | 0.61     | 0.06                     | 0.88     | 0.05                     | 0.82     |
| CT_M_R   | 0.02                      | 0.99     | 0.05                       | 0.91     | -0.05                   | 0.98     | -0.05                    | 0.89     | -0.16                    | 0.41     | -0.15                    | 0.62     | 0.05                     | 0.70     | 0.06                     | 0.77     | 0.08                     | 0.46     | 0.10                     | 0.45     | 0.05                     | 0.88     | 0.06                     | 0.82     |
| CT_Par_L | -0.02                     | 0.99     | 0.02                       | 0.97     | -0.12                   | 0.97     | -0.13                    | 0.69     | -0.10                    | 0.72     | -0.10                    | 0.62     | -0.04                    | 0.70     | -0.02                    | 0.88     | -0.03                    | 0.77     | -0.01                    | 0.94     | 0.08                     | 0.69     | 0.08                     | 0.68     |
| CT_Par_R | 0.08                      | 0.71     | 0.08                       | 0.75     | -0.14                   | 0.97     | 0.13                     | 0.69     | -0.09                    | 0.72     | 0.10                     | 0.62     | 0.06                     | 0.70     | 0.07                     | 0.75     | 0.08                     | 0.46     | 0.08                     | 0.45     | 0.12                     | 0.47     | 0.12                     | 0.47     |
| CT_PFC_L | 0.13                      | 0.47     | 0.11                       | 0.48     | -0.04                   | 0.98     | -0.05                    | 0.89     | -0.03                    | 0.80     | -0.05                    | 0.74     | 0.15                     | 0.32     | 0.13                     | 0.30     | 0.10                     | 0.43     | 0.08                     | 0.45     | 0.14                     | 0.47     | 0.12                     | 0.47     |
| CT_PFC_R | 0.04                      | 0.99     | 0.06                       | 0.91     | 0.00                    | 0.98     | -0.02                    | 0.95     | -0.07                    | 0.74     | -0.07                    | 0.71     | 0.15                     | 0.32     | 0.13                     | 0.30     | 0.09                     | 0.46     | 0.09                     | 0.45     | 0.01                     | 0.98     | 0.00                     | 0.99     |
| CT_PM_L  | 0.10                      | 0.57     | 0.11                       | 0.48     | -0.09                   | 0.97     | 0.10                     | 0.69     | -0.09                    | 0.72     | 0.10                     | 0.62     | 0.08                     | 0.70     | 0.09                     | 0.68     | 0.13                     | 0.39     | 0.14                     | 0.33     | 0.15                     | 0.47     | 0.14                     | 0.47     |
| CT_PM_R  | 0.03                      | 0.99     | 0.04                       | 0.91     | -0.10                   | 0.97     | -0.10                    | 0.69     | -0.16                    | 0.41     | -0.16                    | 0.62     | 0.07                     | 0.70     | 0.07                     | 0.74     | 0.09                     | 0.46     | 0.09                     | 0.45     | 0.06                     | 0.87     | 0.06                     | 0.82     |
| IFOF_L   | 0.12                      | 0.47     | 0.10                       | 0.53     | 0.04                    | 0.98     | 0.03                     | 0.95     | 0.03                     | 0.80     | -0.01                    | 0.94     | 0.15                     | 0.32     | 0.14                     | 0.30     | 0.10                     | 0.43     | 0.08                     | 0.45     | 0.12                     | 0.47     | 0.10                     | 0.63     |
| IFOF_R   | 0.00                      | 1.00     | 0.01                       | 0.97     | 0.01                    | 0.98     | 0.01                     | 0.95     | -0.11                    | 0.72     | 0.11                     | 0.62     | 0.07                     | 0.70     | 0.07                     | 0.74     | 0.07                     | 0.47     | 0.08                     | 0.45     | -0.01                    | 0.98     | -0.01                    | 0.98     |
| ILF_L    | 0.15                      | 0.47     | 0.13                       | 0.48     | 0.01                    | 0.98     | 0.01                     | 0.95     | 0.03                     | 0.80     | 0.01                     | 0.94     | 0.14                     | 0.32     | 0.16                     | 0.30     | 0.14                     | 0.39     | 0.14                     | 0.33     | 0.13                     | 0.47     | 0.12                     | 0.47     |
| ILF_R    | 0.03                      | 0.99     | 0.03                       | 0.91     | 0.00                    | 0.98     | 0.00                     | 0.97     | -0.06                    | 0.74     | -0.07                    | 0.71     | 0.05                     | 0.70     | 0.05                     | 0.78     | 0.07                     | 0.51     | 0.07                     | 0.50     | 0.01                     | 0.98     | 0.02                     | 0.98     |
| SIF_L    | 0.14                      | 0.47     | 0.14                       | 0.48     | -0.07                   | 0.97     | -0.07                    | 0.78     | -0.02                    | 0.83     | -0.03                    | 0.83     | 0.18                     | 0.30     | 0.18                     | 0.26     | 0.21                     | 0.10     | 0.20                     | 0.13     | 0.08                     | 0.69     | 0.08                     | 0.68     |
| SIF_R    | 0.12                      | 0.47     | 0.14                       | 0.48     | -0.02                   | 0.98     | -0.03                    | 0.95     | -0.03                    | 0.80     | -0.04                    | 0.79     | 0.13                     | 0.34     | 0.13                     | 0.30     | 0.15                     | 0.39     | 0.15                     | 0.33     | 0.05                     | 0.88     | 0.06                     | 0.82     |
| UNC_L    | 0.13                      | 0.47     | 0.11                       | 0.48     | 0.00                    | 0.98     | 0.00                     | 0.97     | -0.03                    | 0.80     | -0.04                    | 0.77     | 0.17                     | 0.30     | 0.15                     | 0.30     | 0.16                     | 0.39     | 0.15                     | 0.33     | 0.13                     | 0.47     | 0.12                     | 0.47     |
| UNC_R    | 0.04                      | 0.99     | 0.03                       | 0.91     | 0.07                    | 0.97     | 0.06                     | 0.85     | -0.07                    | 0.74     | -0.06                    | 0.71     | 0.05                     | 0.70     | 0.04                     | 0.79     | 0.11                     | 0.43     | 0.10                     | 0.45     | 0.00                     | 0.98     | 0.00                     | 0.99     |
| Genu     | 0.03                      | 0.99     | 0.03                       | 0.91     | -0.07                   | 0.97     | -0.09                    | 0.69     | -0.08                    | 0.74     | -0.10                    | 0.62     | 0.10                     | 0.64     | 0.07                     | 0.74     | 0.11                     | 0.43     | 0.09                     | 0.45     | 0.00                     | 0.98     | -0.01                    | 0.98     |
| Rost     | -0.11                     | 0.55     | -0.12                      | 0.48     | -0.08                   | 0.97     | -0.10                    | 0.69     | -0.09                    | 0.72     | -0.11                    | 0.62     | 0.02                     | 0.89     | -0.01                    | 0.93     | -0.08                    | 0.46     | -0.10                    | 0.45     | -0.13                    | 0.47     | -0.15                    | 0.47     |
| Splen    | -0.01                     | 1.00     | 0.00                       | 0.97     | -0.02                   | 0.98     | -0.03                    | 0.95     | 0.02                     | 0.83     | -0.01                    | 0.94     | 0.00                     | 1.00     | 0.00                     | 0.96     | 0.01                     | 0.85     | 0.01                     | 0.93     | -0.03                    | 0.97     | -0.03                    | 0.98     |

Table 6.5.b: Comparison between Age-Sex Corrected and Unadjusted Correlations –RD at age 2 and MSEL Scores at age 2

Tables display Pearson’s correlations by each tract with FDR-corrected p-values. Age-Sex models are corrected for age at 2-year visit. Cells highlighted in yellow are significant in one model (i.e. unadjusted or Age-Sex), cells in yellow are significant in both models, and cells highlighted in gray are of a similar magnitude/trend to those significant in the other model.

| Tract    | Age - Sex<br>RD 2 - ELC 2 |          | Unadjusted<br>RD 2 - ELC 2 |          | Age - Sex<br>RD 2 - GM 2 |          | Unadjusted<br>RD 2 - GM2 |          | Age - Sex<br>RD 2 - FM 2 |          | Unadjusted<br>RD 2 - FM2 |          | Age - Sex<br>RD 2 - EL 2 |          | Unadjusted<br>RD 2 - EL2 |          | Age - Sex<br>RD 2 - RL 2 |          | Unadjusted<br>RD 2 - RL2 |          | Age - Sex<br>RD 2 - VR 2 |          | Unadjusted<br>RD 2 - VR2 |          |
|----------|---------------------------|----------|----------------------------|----------|--------------------------|----------|--------------------------|----------|--------------------------|----------|--------------------------|----------|--------------------------|----------|--------------------------|----------|--------------------------|----------|--------------------------|----------|--------------------------|----------|--------------------------|----------|
|          | Pearson's r               | Idr Pval | Pearson's r                | Idr Pval | Pearson's r              | Idr Pval | Pearson's r              | Idr Pval | Pearson's r              | Idr Pval | Pearson's r              | Idr Pval | Pearson's r              | Idr Pval | Pearson's r              | Idr Pval | Pearson's r              | Idr Pval | Pearson's r              | Idr Pval | Pearson's r              | Idr Pval | Pearson's r              | Idr Pval |
| ARC_FP_L | 0.00                      | 0.97     | 0.03                       | 0.93     | -0.07                    | 0.77     | 0.07                     | 0.68     | -0.11                    | 0.42     | 0.09                     | 0.49     | -0.04                    | 0.96     | 0.01                     | 0.99     | 0.06                     | 0.87     | 0.09                     | 0.72     | 0.03                     | 0.86     | 0.04                     | 0.91     |
| ARC_FP_R | 0.09                      | 0.81     | 0.12                       | 0.73     | -0.02                    | 0.89     | -0.02                    | 0.82     | -0.06                    | 0.67     | -0.04                    | 0.67     | 0.06                     | 0.96     | 0.08                     | 0.99     | 0.10                     | 0.80     | 0.13                     | 0.50     | 0.08                     | 0.80     | 0.09                     | 0.88     |
| ARC_FT_L | 0.01                      | 0.97     | 0.03                       | 0.93     | -0.06                    | 0.77     | -0.06                    | 0.68     | -0.10                    | 0.42     | -0.09                    | 0.50     | -0.03                    | 0.96     | 0.00                     | 0.99     | 0.10                     | 0.80     | 0.12                     | 0.53     | 0.05                     | 0.86     | 0.06                     | 0.91     |
| ARC_FT_R | -0.01                     | 0.97     | 0.03                       | 0.93     | -0.04                    | 0.85     | 0.05                     | 0.73     | -0.11                    | 0.42     | 0.09                     | 0.49     | -0.03                    | 0.96     | -0.01                    | 0.99     | 0.04                     | 0.87     | 0.07                     | 0.72     | 0.03                     | 0.86     | 0.04                     | 0.91     |
| ARC_TP_L | -0.02                     | 0.97     | 0.00                       | 1.00     | -0.09                    | 0.77     | -0.10                    | 0.68     | -0.11                    | 0.42     | -0.10                    | 0.48     | -0.01                    | 0.96     | 0.00                     | 0.99     | 0.04                     | 0.87     | 0.05                     | 0.72     | 0.02                     | 0.86     | 0.03                     | 0.91     |
| ARC_TP_R | 0.01                      | 0.97     | 0.03                       | 0.93     | -0.08                    | 0.77     | -0.09                    | 0.68     | -0.12                    | 0.42     | -0.10                    | 0.48     | 0.00                     | 0.99     | 0.01                     | 0.99     | 0.03                     | 0.91     | 0.05                     | 0.72     | 0.07                     | 0.85     | 0.07                     | 0.88     |
| CF_M_L   | -0.10                     | 0.81     | 0.09                       | 0.89     | -0.06                    | 0.77     | 0.09                     | 0.68     | -0.19                    | 0.36     | 0.06                     | 0.65     | -0.05                    | 0.96     | 0.05                     | 0.99     | -0.03                    | 0.91     | 0.12                     | 0.53     | -0.03                    | 0.86     | 0.02                     | 0.93     |
| CF_M_R   | -0.06                     | 0.97     | -0.06                      | 0.93     | -0.14                    | 0.77     | 0.15                     | 0.50     | -0.12                    | 0.42     | -0.11                    | 0.47     | -0.03                    | 0.96     | -0.03                    | 0.99     | 0.01                     | 0.99     | 0.01                     | 0.93     | -0.05                    | 0.86     | -0.07                    | 0.88     |
| Cng_L    | 0.08                      | 0.81     | -0.01                      | 0.93     | -0.02                    | 0.89     | -0.07                    | 0.68     | -0.09                    | 0.52     | -0.13                    | 0.47     | 0.09                     | 0.96     | 0.02                     | 0.99     | 0.10                     | 0.80     | 0.06                     | 0.72     | 0.11                     | 0.79     | 0.00                     | 0.95     |
| Cng_R    | 0.13                      | 0.73     | 0.15                       | 0.73     | 0.02                     | 0.89     | 0.05                     | 0.73     | -0.04                    | 0.71     | 0.17                     | 0.47     | 0.11                     | 0.96     | 0.05                     | 0.99     | 0.16                     | 0.45     | 0.17                     | 0.37     | 0.11                     | 0.79     | 0.11                     | 0.88     |
| CT_M_L   | -0.03                     | 0.97     | -0.01                      | 0.93     | -0.05                    | 0.85     | 0.07                     | 0.68     | -0.13                    | 0.42     | 0.13                     | 0.47     | 0.01                     | 0.96     | 0.02                     | 0.99     | 0.05                     | 0.87     | 0.06                     | 0.72     | 0.01                     | 0.90     | 0.00                     | 0.95     |
| CT_M_R   | 0.05                      | 0.97     | 0.04                       | 0.93     | -0.04                    | 0.85     | -0.03                    | 0.75     | -0.05                    | 0.67     | -0.05                    | 0.65     | 0.04                     | 0.96     | 0.05                     | 0.99     | 0.07                     | 0.87     | 0.08                     | 0.72     | 0.08                     | 0.79     | 0.07                     | 0.88     |
| CT_Par_L | 0.01                      | 0.97     | 0.03                       | 0.93     | -0.09                    | 0.77     | -0.11                    | 0.68     | -0.10                    | 0.42     | -0.11                    | 0.47     | 0.10                     | 0.96     | 0.10                     | 0.99     | 0.00                     | 0.99     | 0.01                     | 0.93     | 0.06                     | 0.86     | 0.05                     | 0.91     |
| CT_Par_R | 0.02                      | 0.97     | 0.03                       | 0.93     | -0.04                    | 0.85     | 0.05                     | 0.73     | -0.09                    | 0.53     | 0.10                     | 0.49     | 0.05                     | 0.96     | 0.05                     | 0.99     | 0.01                     | 0.98     | 0.01                     | 0.93     | 0.05                     | 0.86     | 0.04                     | 0.91     |
| CT_PFC_L | 0.17                      | 0.73     | 0.15                       | 0.73     | -0.10                    | 0.77     | -0.11                    | 0.68     | 0.00                     | 0.99     | -0.02                    | 0.84     | 0.13                     | 0.96     | 0.12                     | 0.99     | 0.10                     | 0.80     | 0.08                     | 0.72     | 0.22                     | 0.16     | 0.19                     | 0.36     |
| CT_PFC_R | 0.03                      | 0.97     | 0.05                       | 0.93     | -0.09                    | 0.77     | -0.11                    | 0.68     | -0.06                    | 0.67     | -0.06                    | 0.65     | 0.10                     | 0.96     | 0.10                     | 0.99     | 0.04                     | 0.87     | 0.05                     | 0.72     | 0.04                     | 0.86     | 0.02                     | 0.91     |
| CT_PM_L  | 0.00                      | 0.97     | 0.01                       | 0.93     | -0.01                    | 0.91     | 0.03                     | 0.82     | -0.07                    | 0.58     | 0.08                     | 0.57     | 0.04                     | 0.96     | 0.05                     | 0.99     | 0.02                     | 0.93     | 0.03                     | 0.79     | 0.02                     | 0.86     | 0.01                     | 0.95     |
| CT_PM_R  | 0.05                      | 0.97     | 0.04                       | 0.93     | -0.06                    | 0.77     | -0.07                    | 0.68     | -0.04                    | 0.69     | -0.05                    | 0.65     | 0.02                     | 0.96     | 0.03                     | 0.99     | 0.08                     | 0.82     | 0.08                     | 0.72     | 0.08                     | 0.79     | 0.07                     | 0.88     |
| IFOF_L   | 0.03                      | 0.97     | 0.02                       | 0.93     | -0.06                    | 0.77     | -0.06                    | 0.69     | -0.05                    | 0.67     | -0.07                    | 0.57     | -0.01                    | 0.96     | 0.00                     | 0.99     | 0.06                     | 0.87     | 0.06                     | 0.72     | 0.06                     | 0.86     | 0.04                     | 0.91     |
| IFOF_R   | -0.02                     | 0.97     | -0.01                      | 0.93     | -0.04                    | 0.85     | 0.04                     | 0.73     | -0.12                    | 0.42     | 0.13                     | 0.47     | -0.02                    | 0.96     | 0.00                     | 0.99     | 0.03                     | 0.91     | 0.04                     | 0.72     | 0.01                     | 0.92     | 0.01                     | 0.95     |
| ILF_L    | 0.06                      | 0.97     | 0.05                       | 0.93     | -0.09                    | 0.77     | -0.08                    | 0.68     | -0.03                    | 0.80     | -0.04                    | 0.67     | 0.03                     | 0.96     | 0.05                     | 0.99     | 0.07                     | 0.87     | 0.07                     | 0.72     | 0.09                     | 0.79     | 0.07                     | 0.88     |
| ILF_R    | -0.04                     | 0.97     | -0.02                      | 0.93     | -0.08                    | 0.77     | -0.08                    | 0.68     | -0.12                    | 0.42     | -0.13                    | 0.47     | 0.01                     | 0.96     | 0.01                     | 0.99     | 0.00                     | 0.99     | 0.01                     | 0.93     | -0.03                    | 0.86     | -0.03                    | 0.91     |
| SLF_L    | 0.02                      | 0.97     | 0.02                       | 0.93     | -0.06                    | 0.77     | -0.06                    | 0.68     | -0.05                    | 0.67     | -0.05                    | 0.65     | 0.01                     | 0.96     | 0.03                     | 0.99     | 0.06                     | 0.87     | 0.07                     | 0.72     | 0.03                     | 0.86     | 0.03                     | 0.91     |
| SLF_R    | -0.04                     | 0.97     | 0.01                       | 0.93     | -0.01                    | 0.93     | 0.02                     | 0.82     | -0.14                    | 0.42     | -0.12                    | 0.47     | -0.02                    | 0.96     | 0.01                     | 0.99     | 0.01                     | 0.98     | 0.02                     | 0.90     | 0.02                     | 0.88     | 0.03                     | 0.91     |
| UNC_L    | 0.13                      | 0.73     | 0.12                       | 0.73     | -0.02                    | 0.89     | -0.02                    | 0.82     | -0.05                    | 0.68     | -0.04                    | 0.68     | 0.06                     | 0.96     | 0.07                     | 0.99     | 0.16                     | 0.45     | 0.17                     | 0.37     | 0.18                     | 0.34     | 0.17                     | 0.36     |
| UNC_R    | 0.09                      | 0.81     | 0.08                       | 0.90     | -0.03                    | 0.89     | -0.04                    | 0.73     | -0.05                    | 0.67     | -0.05                    | 0.65     | 0.03                     | 0.96     | 0.03                     | 0.99     | 0.15                     | 0.45     | 0.14                     | 0.44     | 0.10                     | 0.79     | 0.08                     | 0.88     |
| Genu     | 0.12                      | 0.73     | 0.13                       | 0.73     | -0.15                    | 0.77     | -0.16                    | 0.50     | 0.01                     | 0.90     | 0.02                     | 0.84     | 0.07                     | 0.96     | 0.06                     | 0.99     | 0.15                     | 0.45     | 0.15                     | 0.44     | 0.15                     | 0.64     | 0.13                     | 0.85     |
| Rost     | 0.12                      | 0.73     | 0.10                       | 0.89     | -0.13                    | 0.77     | -0.15                    | 0.50     | 0.08                     | 0.58     | 0.05                     | 0.65     | 0.07                     | 0.96     | 0.05                     | 0.99     | 0.09                     | 0.82     | 0.06                     | 0.72     | 0.12                     | 0.79     | 0.09                     | 0.88     |
| Splen    | -0.11                     | 0.73     | -0.09                      | 0.89     | -0.09                    | 0.77     | -0.11                    | 0.68     | -0.13                    | 0.42     | -0.14                    | 0.47     | -0.11                    | 0.96     | -0.11                    | 0.99     | -0.05                    | 0.87     | -0.05                    | 0.72     | -0.08                    | 0.79     | -0.09                    | 0.88     |



Table 6.5.c: Comparison between Age-Sex Corrected and Unadjusted Correlations –FA at age 2 and MSEL Scores at age 2

Tables display Pearson's correlations by each tract with FDR-corrected p-values. Age-Sex models are corrected for age at 2-year visit. Cells highlighted in yellow are significant in one model (i.e. unadjusted *or* Age-Sex), cells in yellow are significant in both models, and cells highlighted in gray are of a similar magnitude/trend to those significant in the other model.

| Tract    | Age - Sex<br>FA 2 - ELC 2 |          | Unadjusted<br>FA 2 - ELC 2 |          | Age - Sex<br>FA 2 - GM 2 |          | Unadjusted<br>FA 2 - GM2 |          | Age - Sex<br>FA 2 - FM 2 |          | Unadjusted<br>FA 2 - FM2 |          | Age - Sex<br>FA 2 - EL 2 |          | Unadjusted<br>FA 2 - EL2 |          | Age - Sex<br>FA 2 - RL 2 |          | Unadjusted<br>FA 2 - RL2 |          | Age - Sex<br>FA 2 - VR 2 |          | Unadjusted<br>FA 2 - VR2 |          |
|----------|---------------------------|----------|----------------------------|----------|--------------------------|----------|--------------------------|----------|--------------------------|----------|--------------------------|----------|--------------------------|----------|--------------------------|----------|--------------------------|----------|--------------------------|----------|--------------------------|----------|--------------------------|----------|
|          | Pearson's r               | Idr Pval | Pearson's r                | Idr Pval | Pearson's r              | Idr Pval | Pearson's r              | Idr Pval | Pearson's r              | Idr Pval | Pearson's r              | Idr Pval | Pearson's r              | Idr Pval | Pearson's r              | Idr Pval | Pearson's r              | Idr Pval | Pearson's r              | Idr Pval | Pearson's r              | Idr Pval | Pearson's r              | Idr Pval |
| ARC_FP_L | 0.09                      | 0.58     | 0.06                       | 0.84     | 0.03                     | 0.95     | 0.02                     | 0.93     | 0.08                     | 0.70     | 0.05                     | 0.76     | 0.15                     | 0.51     | 0.11                     | 0.89     | 0.05                     | 0.94     | 0.01                     | 0.98     | 0.03                     | 0.97     | 0.02                     | 0.92     |
| ARC_FP_R | -0.12                     | 0.43     | -0.15                      | 0.33     | -0.01                    | 0.95     | -0.01                    | 0.93     | 0.01                     | 0.92     | -0.02                    | 0.82     | -0.07                    | 0.86     | -0.09                    | 0.89     | -0.11                    | 0.68     | -0.14                    | 0.70     | -0.12                    | 0.48     | -0.13                    | 0.35     |
| ARC_FT_L | -0.02                     | 0.95     | -0.04                      | 0.86     | 0.01                     | 0.95     | 0.00                     | 1.00     | 0.06                     | 0.70     | 0.02                     | 0.82     | 0.03                     | 0.86     | 0.00                     | 0.99     | -0.09                    | 0.76     | -0.12                    | 0.70     | -0.07                    | 0.68     | -0.09                    | 0.75     |
| ARC_FT_R | -0.01                     | 0.96     | -0.03                      | 0.86     | 0.04                     | 0.95     | 0.04                     | 0.93     | 0.11                     | 0.70     | 0.08                     | 0.74     | 0.03                     | 0.86     | 0.01                     | 0.99     | 0.03                     | 0.94     | -0.06                    | 0.98     | -0.07                    | 0.70     | -0.08                    | 0.76     |
| ARC_TP_L | 0.05                      | 0.80     | 0.04                       | 0.86     | 0.02                     | 0.95     | 0.02                     | 0.93     | 0.09                     | 0.70     | 0.09                     | 0.71     | 0.04                     | 0.86     | 0.02                     | 0.99     | 0.01                     | 0.94     | -0.01                    | 0.98     | 0.02                     | 0.88     | 0.02                     | 0.92     |
| ARC_TP_R | 0.00                      | 0.96     | 0.02                       | 0.93     | 0.08                     | 0.95     | 0.08                     | 0.93     | 0.09                     | 0.70     | 0.09                     | 0.71     | 0.03                     | 0.86     | 0.03                     | 0.99     | 0.03                     | 0.94     | 0.03                     | 0.98     | -0.09                    | 0.68     | -0.07                    | 0.76     |
| CF_M_L   | 0.17                      | 0.22     | -0.06                      | 0.84     | 0.06                     | 0.95     | -0.03                    | 0.93     | 0.17                     | 0.43     | -0.06                    | 0.74     | 0.09                     | 0.67     | 0.01                     | 0.99     | 0.12                     | 0.68     | -0.04                    | 0.98     | 0.11                     | 0.49     | -0.02                    | 0.92     |
| CF_M_R   | 0.15                      | 0.35     | 0.15                       | 0.33     | 0.13                     | 0.95     | 0.13                     | 0.93     | 0.10                     | 0.70     | 0.09                     | 0.71     | 0.07                     | 0.86     | 0.07                     | 0.99     | 0.10                     | 0.68     | 0.10                     | 0.83     | 0.14                     | 0.40     | 0.14                     | 0.30     |
| Cing_L   | -0.09                     | 0.58     | 0.03                       | 0.86     | -0.03                    | 0.95     | 0.02                     | 0.93     | 0.02                     | 0.86     | 0.09                     | 0.71     | -0.11                    | 0.67     | 0.01                     | 0.99     | -0.07                    | 0.94     | 0.00                     | 0.98     | -0.07                    | 0.68     | 0.03                     | 0.92     |
| Cing_R   | -0.21                     | 0.18     | -0.20                      | 0.28     | -0.12                    | 0.95     | 0.01                     | 0.93     | -0.07                    | 0.70     | -0.16                    | 0.50     | -0.15                    | 0.51     | -0.13                    | 0.89     | -0.20                    | 0.32     | -0.20                    | 0.30     | -0.15                    | 0.34     | -0.18                    | 0.18     |
| CT_M_L   | 0.04                      | 0.86     | 0.03                       | 0.86     | 0.01                     | 0.95     | 0.02                     | 0.93     | 0.10                     | 0.70     | 0.09                     | 0.71     | 0.01                     | 0.92     | 0.01                     | 0.99     | 0.01                     | 0.94     | 0.00                     | 0.98     | 0.02                     | 0.88     | 0.03                     | 0.92     |
| CT_M_R   | -0.02                     | 0.95     | 0.00                       | 0.99     | -0.01                    | 0.95     | -0.01                    | 0.93     | -0.03                    | 0.82     | -0.03                    | 0.82     | 0.01                     | 0.93     | 0.00                     | 0.99     | -0.01                    | 0.94     | -0.01                    | 0.98     | -0.04                    | 0.84     | -0.02                    | 0.92     |
| CT_Par_L | 0.03                      | 0.95     | 0.04                       | 0.86     | 0.02                     | 0.95     | 0.03                     | 0.93     | 0.08                     | 0.70     | 0.09                     | 0.71     | -0.13                    | 0.58     | -0.11                    | 0.89     | 0.01                     | 0.94     | 0.02                     | 0.98     | 0.06                     | 0.70     | 0.09                     | 0.75     |
| CT_Par_R | 0.05                      | 0.80     | 0.04                       | 0.86     | -0.07                    | 0.95     | -0.05                    | 0.93     | 0.07                     | 0.70     | 0.07                     | 0.74     | -0.01                    | 0.92     | -0.01                    | 0.99     | 0.02                     | 0.98     | 0.02                     | 0.98     | 0.04                     | 0.84     | 0.06                     | 0.81     |
| CT_PFC_L | -0.13                     | 0.43     | -0.13                      | 0.42     | 0.10                     | 0.95     | 0.11                     | 0.93     | -0.04                    | 0.79     | -0.05                    | 0.76     | -0.04                    | 0.86     | -0.04                    | 0.99     | -0.06                    | 0.94     | -0.07                    | 0.98     | -0.20                    | 0.14     | -0.18                    | 0.18     |
| CT_PFC_R | -0.06                     | 0.80     | -0.06                      | 0.84     | 0.07                     | 0.95     | 0.08                     | 0.93     | -0.03                    | 0.82     | -0.04                    | 0.82     | -0.03                    | 0.86     | -0.03                    | 0.99     | -0.03                    | 0.94     | -0.04                    | 0.98     | -0.08                    | 0.68     | -0.07                    | 0.76     |
| CT_PM_L  | 0.10                      | 0.54     | 0.09                       | 0.84     | -0.04                    | 0.95     | -0.02                    | 0.93     | 0.04                     | 0.79     | 0.03                     | 0.82     | 0.03                     | 0.86     | 0.03                     | 0.99     | 0.09                     | 0.76     | 0.07                     | 0.98     | 0.12                     | 0.48     | 0.12                     | 0.42     |
| CT_PM_R  | -0.02                     | 0.95     | 0.00                       | 0.99     | -0.02                    | 0.95     | -0.01                    | 0.93     | -0.06                    | 0.70     | -0.05                    | 0.76     | 0.03                     | 0.86     | 0.03                     | 0.99     | -0.02                    | 0.94     | -0.02                    | 0.98     | -0.03                    | 0.88     | -0.01                    | 0.92     |
| IFOF_L   | 0.06                      | 0.80     | 0.06                       | 0.84     | 0.08                     | 0.95     | 0.07                     | 0.93     | 0.06                     | 0.70     | 0.06                     | 0.74     | 0.13                     | 0.58     | 0.11                     | 0.89     | 0.01                     | 0.94     | 0.00                     | 0.98     | 0.04                     | 0.84     | 0.04                     | 0.92     |
| IFOF_R   | 0.01                      | 0.96     | 0.00                       | 0.99     | 0.04                     | 0.95     | 0.05                     | 0.93     | 0.06                     | 0.70     | 0.06                     | 0.74     | 0.06                     | 0.86     | 0.04                     | 0.99     | 0.01                     | 0.94     | -0.03                    | 0.98     | -0.04                    | 0.84     | -0.04                    | 0.92     |
| ILF_L    | 0.07                      | 0.80     | 0.07                       | 0.84     | 0.06                     | 0.95     | 0.06                     | 0.93     | 0.06                     | 0.70     | 0.06                     | 0.74     | 0.09                     | 0.67     | 0.09                     | 0.89     | 0.05                     | 0.94     | 0.05                     | 0.98     | 0.02                     | 0.88     | 0.03                     | 0.92     |
| ILF_R    | 0.08                      | 0.73     | 0.06                       | 0.84     | 0.06                     | 0.95     | 0.06                     | 0.93     | 0.13                     | 0.70     | 0.14                     | 0.71     | 0.04                     | 0.86     | 0.03                     | 0.99     | 0.04                     | 0.94     | 0.03                     | 0.98     | 0.05                     | 0.84     | 0.05                     | 0.86     |
| SLF_L    | 0.06                      | 0.80     | 0.06                       | 0.84     | 0.02                     | 0.95     | 0.02                     | 0.93     | 0.04                     | 0.79     | 0.02                     | 0.82     | 0.10                     | 0.67     | 0.09                     | 0.89     | 0.05                     | 0.94     | 0.04                     | 0.98     | 0.00                     | 0.99     | 0.01                     | 0.92     |
| SLF_R    | 0.12                      | 0.43     | 0.09                       | 0.84     | -0.03                    | 0.95     | -0.03                    | 0.93     | 0.12                     | 0.70     | 0.10                     | 0.71     | 0.10                     | 0.67     | 0.07                     | 0.99     | 0.13                     | 0.68     | 0.09                     | 0.98     | 0.02                     | 0.88     | 0.01                     | 0.92     |
| UNC_L    | -0.01                     | 0.96     | -0.02                      | 0.91     | 0.04                     | 0.95     | 0.04                     | 0.93     | 0.04                     | 0.79     | 0.02                     | 0.82     | 0.09                     | 0.67     | 0.07                     | 0.99     | -0.03                    | 0.94     | -0.05                    | 0.98     | -0.08                    | 0.68     | -0.08                    | 0.76     |
| UNC_R    | -0.03                     | 0.93     | -0.03                      | 0.86     | 0.08                     | 0.95     | 0.08                     | 0.93     | 0.00                     | 0.99     | 0.00                     | 0.98     | 0.04                     | 0.86     | 0.03                     | 0.99     | -0.03                    | 0.94     | -0.04                    | 0.98     | -0.08                    | 0.68     | -0.07                    | 0.76     |
| Genu     | -0.12                     | 0.47     | -0.13                      | 0.42     | 0.10                     | 0.95     | 0.11                     | 0.93     | -0.04                    | 0.79     | -0.06                    | 0.74     | 0.01                     | 0.92     | 0.00                     | 0.99     | -0.13                    | 0.68     | -0.13                    | 0.70     | -0.17                    | 0.29     | -0.17                    | 0.22     |
| Rost     | -0.18                     | 0.18     | -0.17                      | 0.28     | 0.10                     | 0.95     | 0.11                     | 0.93     | -0.13                    | 0.70     | -0.11                    | 0.71     | -0.04                    | 0.86     | -0.03                    | 0.99     | -0.14                    | 0.68     | -0.12                    | 0.70     | -0.21                    | 0.14     | -0.19                    | 0.18     |
| Splen    | 0.19                      | 0.18     | 0.17                       | 0.28     | 0.08                     | 0.95     | 0.10                     | 0.93     | 0.21                     | 0.17     | 0.19                     | 0.33     | 0.19                     | 0.39     | 0.19                     | 0.39     | 0.11                     | 0.68     | 0.10                     | 0.83     | 0.14                     | 0.40     | 0.15                     | 0.30     |
